# Supplementary material for: CG methylated microarrays identify a novel methylated sequence bound by the CEBPB|ATF4 heterodimer that is active in vivo
Source: HighWire-hosted journal article supplement (doi:10.1101/gr.146654.112), 2013-04-16
Supplement: Supplemental_Material.pdf [file Supplemental_Material.pdf]

## Supplemental Information

### Supplemental Figure Legends

**Supplementary Figure 1. (A-B)** Validation of methylation of protein binding microarray using methylation insensitive (MspI) endonuclease. The 40K feature microarray is scanned at 570 nm to detect Cy3-cytosine spiked into the DNA double stranding reactions. Fluorescence intensities before and after methylation were normalized. Probes containing CCGG are in red and remaining features are in black. **(A)** Normalized fluorescence intensities of unmethylated 40K feature microarray before and after MspI digestion. **(B)** Normalized fluorescence intensities of methylated 40K feature microarray before and after MspI digestion. **(C-F)** Effect of protease treatment after methylation on CEBPA-GST and CEBPB-GST binding to the 180K feature microarray. Scatter plot presenting fluorescence intensities **(C-D)** without protease treatment and **(E-F)** with protease treatment after methylation from **(C and E)** CEBPA-GST and **(D and F)** CEBPB-GST. CG-containing 8-mers are in grey; non-CG containing 8-mers are in black. UM: unmethylated array, M: methylated array.

**Supplementary Figure 2. Effect of methylation on DNA binding properties of B-ZIP homodimers and heterodimer:** **(A-C)** Z-scores from 40K feature microarray for B-ZIP proteins **(A)** JUN-GST, **(B)** JUND-GST, **(C)** CEBPG-GST. The 8-mers (32,896) are plotted with and without methylation and are color-coded: CG (grey), non-CG (black), TTGC|G (green), CGAT|G (blue) and TGAC|G (red). The best-bound 8-mer is labeled. **(D)** Logos for the 8 B-ZIP homodimers derived from the best-bound unmethylated 8-mers (up to 10) based on Z-scores above 10. **(E)** Hierarchical clustering based on Z-scores obtained from 40K arrays. Replicated experiments cluster together confirming the reproducibility of array results.

**Supplementary Figure 3. Effect of methylation on DNA binding properties of 8 B-ZIP homodimers:** E-scores from 40K feature microarray for 8 B-ZIP proteins **(A)** CEBPA-GST. **(B)** CEBPG-GST. **(C)** CEBPB-GST. **(D)** CEBPD-GST. **(E)** JUN-GST. **(F)** JUND-GST. **(G)** ATF4-GST. **(H)** CREB1-GST. The figure is based on the same data used in Fig. 1C-H, 2 and SFigure 2A-C. The 8-mers (32,896) are plotted with and without methylation and are color-coded: CG (grey), non-CG (black), TTGC|G (green), and TGAC|G (red). The best-bound 8-mer is labeled and logos are derived from the best-bound unmethylated 8-mers (up to 10) based on E-scores above 0.4.

**Supplementary Figure 4. Effect of methylation on DNA binding properties of B-ZIP homodimers.** Z-scores from 40K feature microarray for B-ZIP proteins **(A)** CEBPA-GST, **(B)** CEBPG-GST, **(C)** CEBPB-GST, **(D)** CEBPD-GST, **(E)** JUN-GST, **(F)** JUND-GST, **(G)** ATF4-GST, **(H)** CREB1-GST. The 5-mers (512) are plotted with and without methylation and are color-coded: CG (grey), non-CG (black). The best-bound 5-mers are labeled. Examination of 5-mer binding identifies that some B-ZIP homodimers bind well to specific half-sites (CEBPB, CEBPD, CREB1) while others show little preference for specific 5-mers (CEBPA, CEBPG, ATF4, and JUN). JUND binds the 5-mer (C|GTGA) that is not part of the best-bound CRE 8-mer.

**Supplementary Figure 5. Effect of heterodimerization on the DNA binding properties of CEBPB and ATF4 to unmethylated and methylated 8-mers.** **(A-C)** The 8-mers are color-coded: CG (grey), non-CG (black), TGAC|G (red), TTGC|G (green), and CGAT|G (blue) **(A)** Z-scores from 40K array showing the effect of methylation on binding properties of CEBPB|ATF4-GST. **(B-C)** E-scores from 40K array showing the effect of methylation on the DNA binding properties of the **(B)** CEBPB-GST|ATF4 and **(C)** CEBPB|ATF4-GST heterodimers. Chimeric sequence (TGAC|GCAA) is preferentially bound by both CEBPB-GST|ATF4 (**Fig.1H**) and CEBPB|ATF4-GST when it is unmethylated. The best-bound non-CG 8-mer is TGAT|GCAA, which is the deamination product of the chimeric sequence, TGAC|GCAA. CGAT|GCAA is again the best-bound methylated 8-mer for both CEBPB-GST|ATF4 and CEBPB|ATF4-GST. **(D)** Hierarchical clustering based on Z-scores obtained from 40K arrays for replicated experiments, confirming the reproducibility of array results. **(E-F)** Z-scores for 5-mers from 40K feature microarray for B-ZIP proteins CEBPB-GST|ATF4 **(E)** and CEBPB|ATF4-GST **(F)**. The Z-scores for 5-mers (512) are plotted with and without methylation and are color-coded: CG in grey and non-CG in black, and CGATG in blue. The best-bound 5-mers are indicated by arrows.

**Supplementary Figure 6. (A-B)** Effect of three different flanking sequences on fluorescence intensities containing CEBP binding sites. In 180K arrays, all non-CG 8-mers (40,545) are presented 2-3 times and all CG containing 8-mers (24,991) are presented three times in different flanking sequences (FS). Fluorescence intensities obtained from the 180K feature array after methylation for **(A)** CEBPA and **(B)** CEBPB binding to CEBP like sequences in three different flanking sequences are shown. **(C-D)** Digestion of **(C)** unmethylated and **(D)** methylated 180K

feature array using methylation insensitive (MspI) endonuclease. Fluorescence intensities at 570 nm are plotted for all features, CCGG containing features are colored in red and the remaining features are in black.

**Supplementary Figure 7. (A-B)** Fluorescence intensities of CEBPB-GST binding to the 32,640 8-mers and their respective complementary sequences on **(A)** unmethylated and **(B)** methylated 180K arrays. **(C-D)** Scatter plots comparing Z-scores (40K array) and fluorescence intensities (180K array) for CEBPB-GST binding to **(C)** unmethylated or **(D)** methylated arrays. CG-containing 8-mers are in grey and non-CG containing 8-mers in black. The lack of correlation is attributed to the effect of flanking sequences on the 180K array (T-NNNNNNNN-A).

**Supplementary Figure 8. (A-B)** The effect of methylation on DNA binding properties of CEBPB|ATF4 heterodimer. Fluorescence intensities at 660 nm from the 180K feature microarray are plotted for all of the 65,536 8-mers in the background T-NNNNNNNN-A. Lines are fitted to the 64 8-mers containing the color coded 5-mers and non-CG 8-mers as described in **Fig. 3. (A)** Effect of methylation on DNA binding of CEBPB|ATF4-GST. **(B)** Effect of methylation on DNA binding when both monomers are labeled with GST (CEBPB-GST|ATF4-GST). Similar results are obtained as in Fig. 3E. **(C)** EMSA using purified CEBPB, ATF4, and CEBPB|ATF4 B-ZIP domain dimers mixed with unmethylated and methylated CGAT|GCAA containing DNA probes. Protein dimer concentrations are indicated. \* indicates protein-DNA complexes at the lowest protein concentration. Note that the CEBPB|ATF4-DNA complex moves slower than CEBPB-DNA complex, and faster than ATF4-DNA complex. **(D)** EMSA using *in vitro* translated CEBPB-GST|ATF4 B-ZIP proteins mixed with unmethylated, two hemimethylated and methylated CGAT|GCAA containing DNA probes (lanes 1-20). Last two lanes are the EMSA using *in vitro* translated CEBPB-GST with unmethylated and methylated CGAT|GCAA containing DNA probes.

**Supplementary Figure 9. (A)** EMSA showing CEBPB|ATF4 heterodimer preferentially binds to unmethylated TTGC|GTCA. Purified CEBPB, ATF4, and CEBPB|ATF4 B-ZIP domain dimers were mixed with unmethylated, hemi-methylated or methylated TTGC|GTCA containing DNA probes. Protein dimer concentrations are indicated. Asterisks mark lanes with the same protein concentration. **(B)** EMSA showing CEBPB preferentially binds to methylated ATTGC|GCAAT without Mg<sup>2+</sup> in the gel or in the binding reactions. Purified CEBPB B-ZIP

domain dimers were mixed with methylated or unmethylated DNA probes containing the same consensus TTGC|GCAA 8-mer but different flanking nucleotides at the 5' and 3' end of the 8-mer. Protein dimer concentrations are indicated. No  $Mg^{2+}$  in the gel or in the binding reactions.

**Supplementary Figure 10.** (A) Distribution of CG methylation status in primary female mouse dermal fibroblasts. (B) Percent of CGs with increasing read depth (red is forward strand and blue is reverse strand). More than 90% of the total cytosine's in the CG have read depth >10X.

**Supplementary Figure 11.** (A) Number of CEBPB ChIP-seq peaks before and after thapsigargin treatment and ATF4 ChIP-seq peaks after thapsigargin treatment (B) Percentage of all 8-mers in CEBPB ChIP-seq peaks in the mouse dermal fibroblasts plotted against CEBPB-GST binding using  $\log_{10}$  Z-scores for methylated array. (C-F) Methylation status of canonical CEBP sites (TTGC|GCAA) in (C) the whole genome and (D) CEBPB ChIP-seq peaks of mouse dermal fibroblasts. (E-F) Methylation status of canonical CREB1 sites (TGAC|GTCA) in (E) whole genome, and (F) CREB1 ChIP-seq peaks of mouse dermal fibroblasts.

**Supplementary Figure 12.** (A-B) Percent of all 8-mers in CEBPB ChIP-seq peaks in mouse dermal fibroblasts after ATF4 induction by thapsigargin plotted against CEBPB-GST|ATF4 heterodimer binding using (A) Z-scores and (B)  $\log_{10}$  Z-scores for methylated arrays. (C) Enrichment of 8-mers in CEBPB ChIP-seq peaks before and after treatment with thapsigargin. (D) Enrichment of 8-mers in CEBPB and ATF4 ChIP-seq peaks after treatment with thapsigargin.

**Supplementary Figure 13.** (A-B) Changes in CEBPB binding to methylated 8-mers 1 CG dinucleotide after ATF4 induction vs. (A) Z-score and (B)  $\log_{10}$  Z-scores for CEBPB-GST|ATF4 heterodimer binding to 8-mers from methylated arrays. (C-D) Enrichment of 8-mers with 1 CG dinucleotide in CEBPB ChIP-seq peaks before and after treatment with thapsigargin in linear (C) and logarithmic (D) scale. (E-F) Enrichment of 8-mers with 1 CG dinucleotide in CEBPB and ATF4 ChIP-seq peaks after treatment with thapsigargin in linear (E) and logarithmic (F) scale.

## Supplemental Tables

**Supplementary Table 1. (A-B)** Estimation of length of CEBP motif from 40K (A) and 180K (B) array. Z-scores obtained from 40K array for CEBP site, TGC|GCAAN to identify the potential 9-mer sequence by extending to the 3' side of the 8-mer. For all CEBP family members (CEBPA, CEBPB, CEBPG and CEBPD), the highest values of Z-scores are for 8-mer with "T" on 3' side (TGCGCAAT). Further extension to the 3' side, GC|GCAATN lead to considerable decrease in Z-score values for all the CEBP family members as well as no preferred binding for any specific nucleotide. Since the Z-score values for the complementary sequences are same we can extend the 8-mer NTTGC|GCA to the 5' side, the most preferred sequence will be the palindromic 10-mer ATTGC|GCAAT. (C) Estimation of length of TRE and CRE motifs. Z-scores obtained from 40K array for TRE-N (TGAGTCAN and TGACTCAN) and CRE-N (GAC|GTCAN) to identify the potential 9-mer sequences by extending to the 3' side of the 8-mer. For JUND and JUN highest values for Z-scores are obtained for TRE 8-mer with a "T" on 3' side TGA[G/C]TCAT. Extending to the 3' side for CRE site, GAC|GTCAN "A" on 3' is least preferred by CREB1 suggesting the site to be GAC|GTCAB, where B= C, G or T. (D) P-values (40K and 180K arrays)

**Supplementary Table 2.** Z-score from 40K array for homodimers (CEBPB and ATF4) and heterodimers (CEBPB-GST|ATF4 and CEBPB|ATF4-GST) for canonical CEBP, canonical CRE, chimera and CGATG site. Binding of CEBPB to the canonical CEBP site (TTGC|GCAA) is enhanced by methylation. However, methylation decreases binding of ATF4 to the best bound canonical CRE site (TGAC|GTCA). Similarly methylation also decreases binding of heterodimers (CEBPB-GST|ATF4 and CEBPB|ATF4-GST) to the chimeric site TGAC|GCAA. However, methylation considerably potentiates binding of heterodimers to CGATG site (CGAT|GCAA).

**Supplementary Table 3. (A)** Ratio of fluorescence intensities for the best versus the worst bound 8-mer sequences by CEBPB or ATF4 homodimers and ATF4|CEBPB heterodimer on 180K array. (B) Fluorescence intensities ( $\times 1,000$ ) from 180K array for homodimers (CEBPB and ATF4) and heterodimers (CEBPB-GST|ATF4 and ATF4-GST|CEBPB) for canonical CEBP, CRE, chimera and CGAT|G. Binding of CEBPB to the canonical CEBP site (ATTGC|GCAA) is enhanced by methylation. A (*italics*) is from the flanking array sequence that is part of the

binding site. However, methylation decreases binding of ATF4 to the best bound canonical CRE site (ATGAC|GTCA). Similarly methylation also decreases binding of heterodimers (CEBPB-GST|ATF4 and ATF4-GST|CEBPB) binding to the chimeric site CTGAC|GCAA. However, methylation considerably potentiates binding of heterodimers to CGAT|G site (CCGAT|GCAA) as observed in 40K array. **(C)** Methylated 8-mer NCGAT|GCAA bound well by ATF4|CEBPB heterodimer. Fluorescence intensities ( $\times 1,000$ ) obtained from 180K array for homodimers (CEBPB and ATF4) and heterodimer (CEBPB|ATF4) binding to NCGAT|GCAA for the identification of the potential 9-mer sequence by extending to the 5' side of 8-mer. A (*italics*) is from the flanking array sequence that is part of the binding site. "T" on the 5' side of "TCGAT|GCAA" is not preferred by heterodimers CEBPB|ATF4 after methylation.

**Supplementary Table 4. (A)** Genome wide cytosine methylation in the context of CG, CHG and CHH (H=A, C, T) in mouse primary dermal fibroblasts with a coverage of 50X. **(B)** Occurrences of CEBP 10-mer, 8-mer, deaminated 8-mer, CGAT|GCA and deaminated chimeric CEBP-CRE motifs in the genome, number with a known methylation status in dermal fibroblasts, and fraction of unmethylated and methylated motifs bound by CEBPB before and after ATF4 induction in the unmasked genome. **(C)** CREB1 binding to unmethylated and methylated CRE 8-mers (TGAC|GTCA) in female mouse primary dermal fibroblasts

**Supplementary Table 5. (A)** *In vivo* and *in vitro* CEBPB binding to unmethylated and methylated CEBP like 9-mers. **(B)** CEBPB binding to unmethylated and methylated CEBP like 10-mers in mouse primary dermal fibroblasts.

**Supplementary Table 6. (A)** Enriched GO Terms for genes bound by CEBPB in dermal fibroblasts with TGAT|GCAA motif within -10kbp to 1kbp of the TSS after ATF4 induction by *Tg*. **(B)** P-values based on fraction of CEBP ChIP-seq peaks vs non peaks containing K-mers with mCGAT|G before and after ATF4 induction. **(C)** Enriched GO Terms for genes bound by CEBPB in dermal fibroblasts with methylated and unmethylated CGAT|G motif within -10kbp to 1kbp of the TSS after ATF4 induction by *Tg*.

**Supplementary Table 7.** B-ZIP domain sequences used in this study.

Supplementary Figure 1:

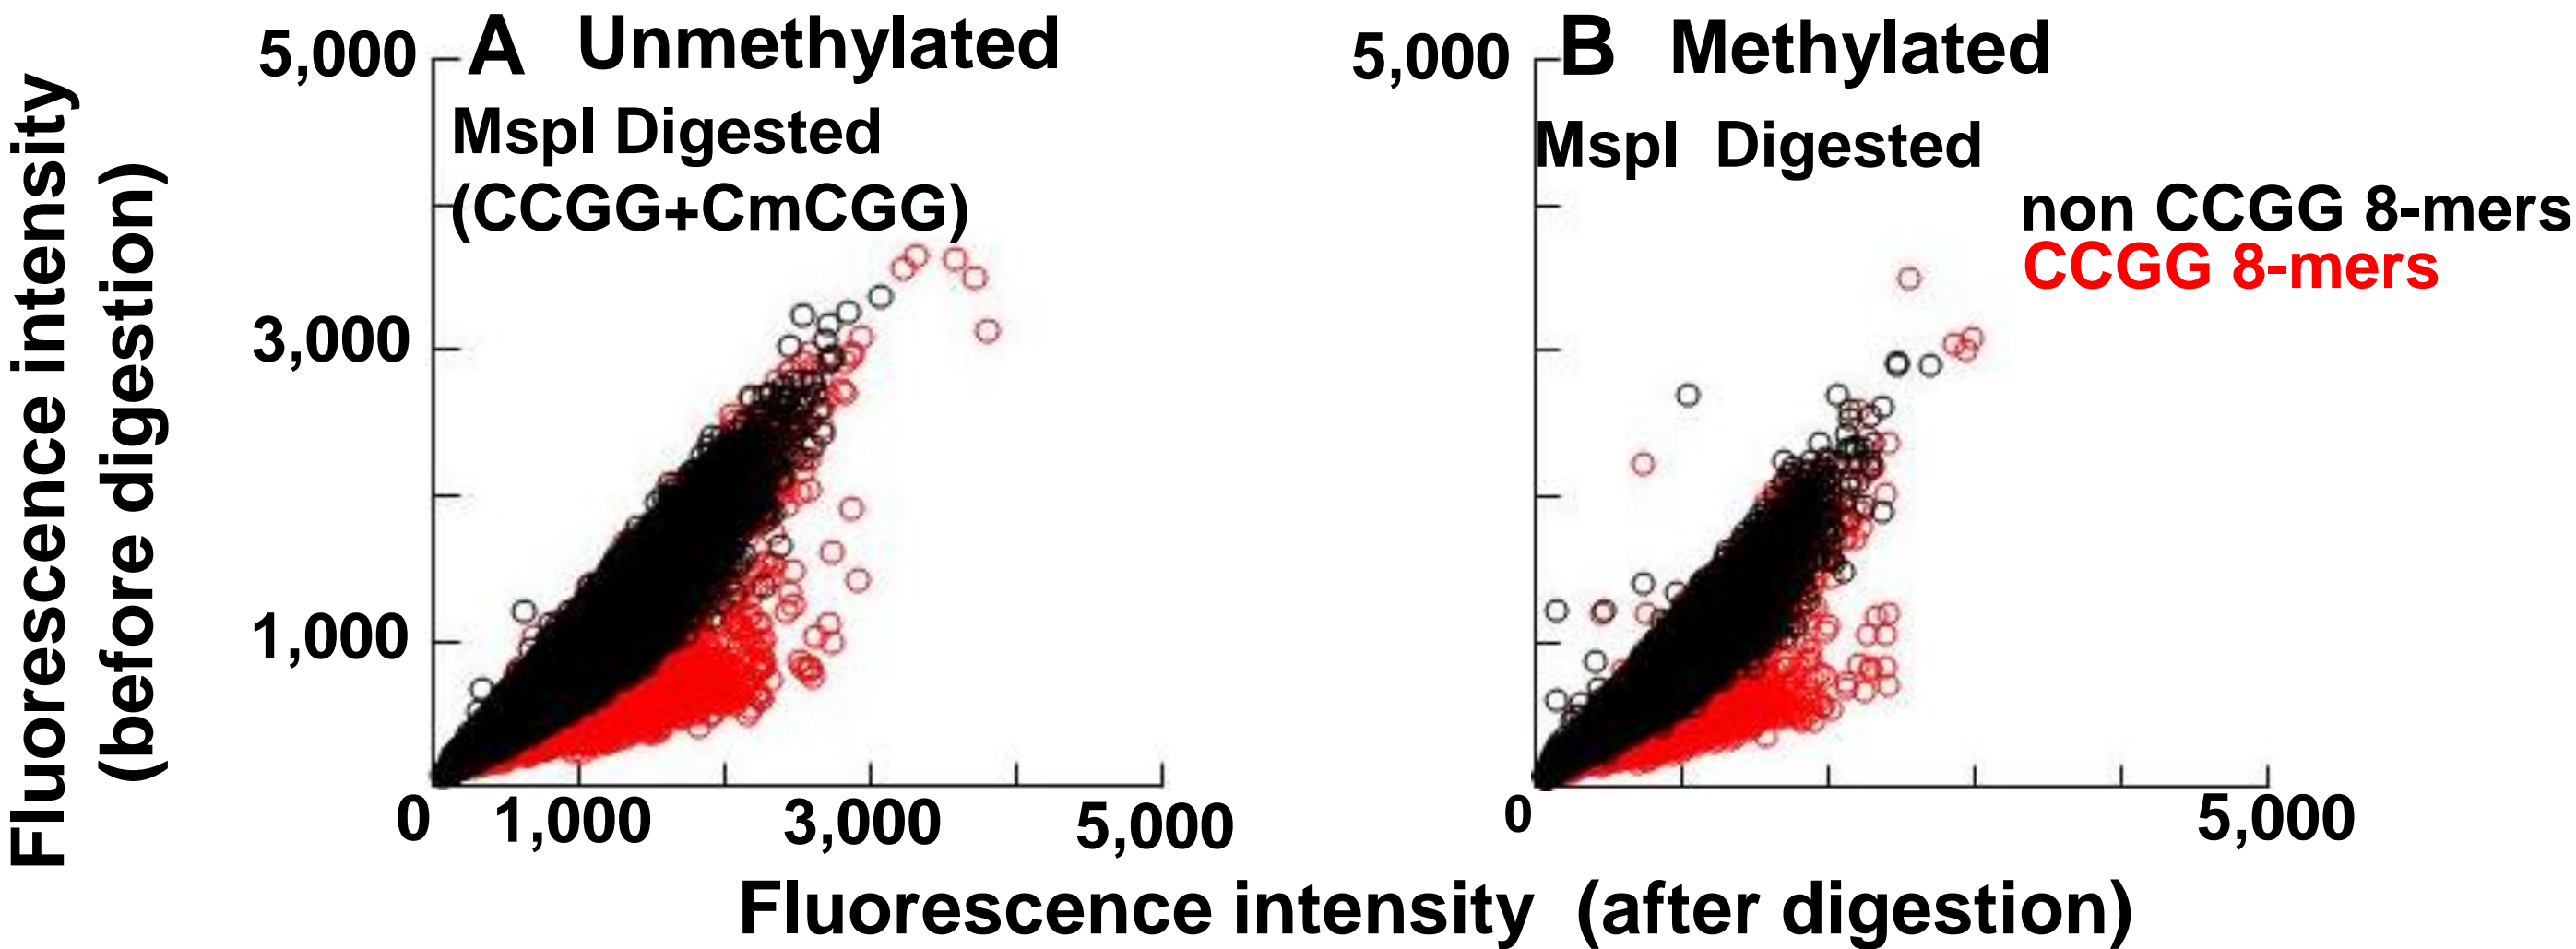

Non protease data

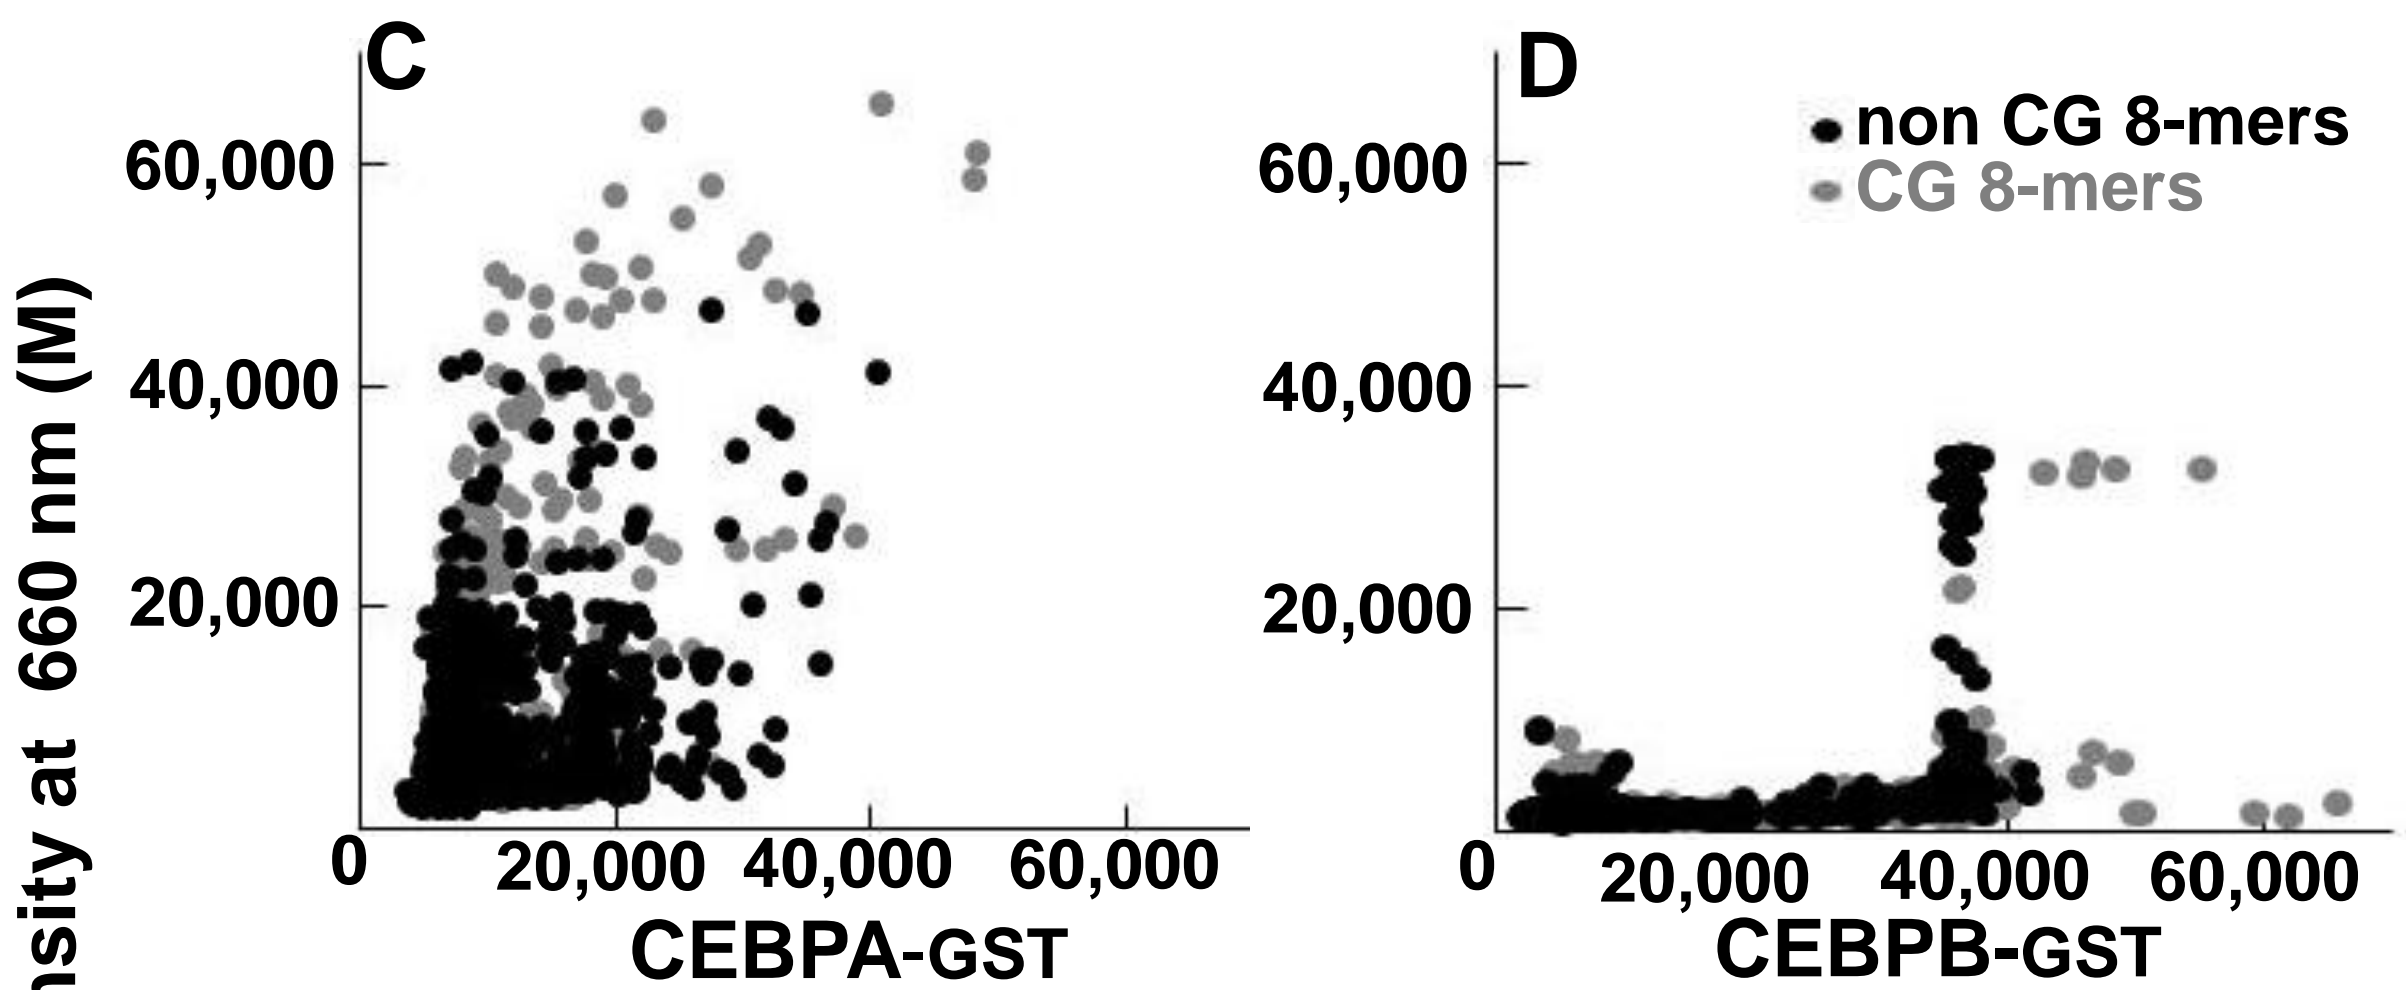

Protease data

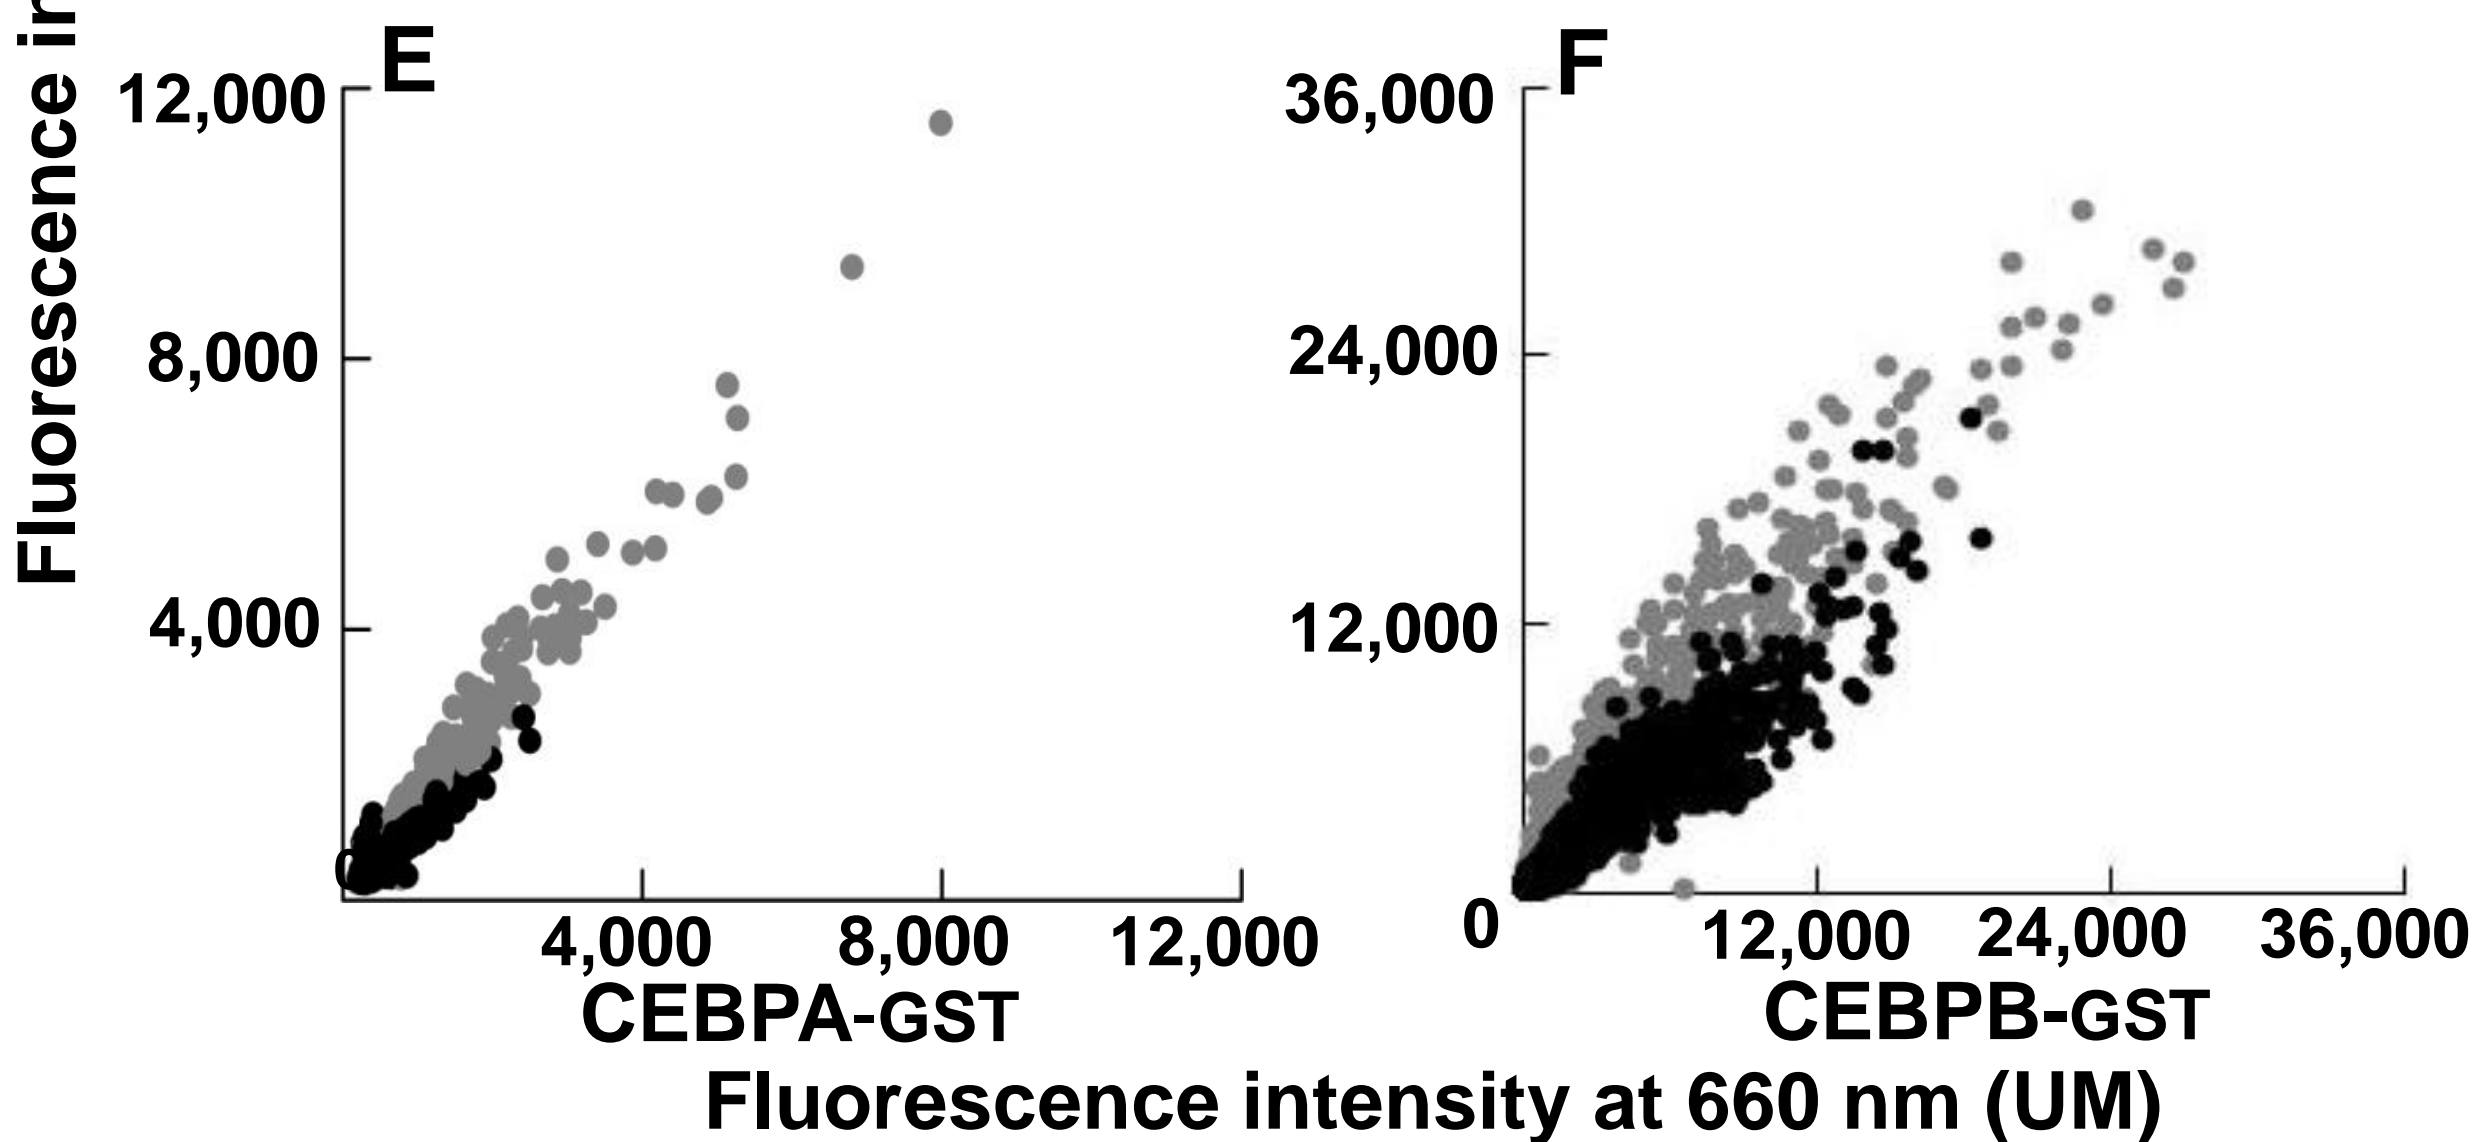



Supplementary Figure 2:

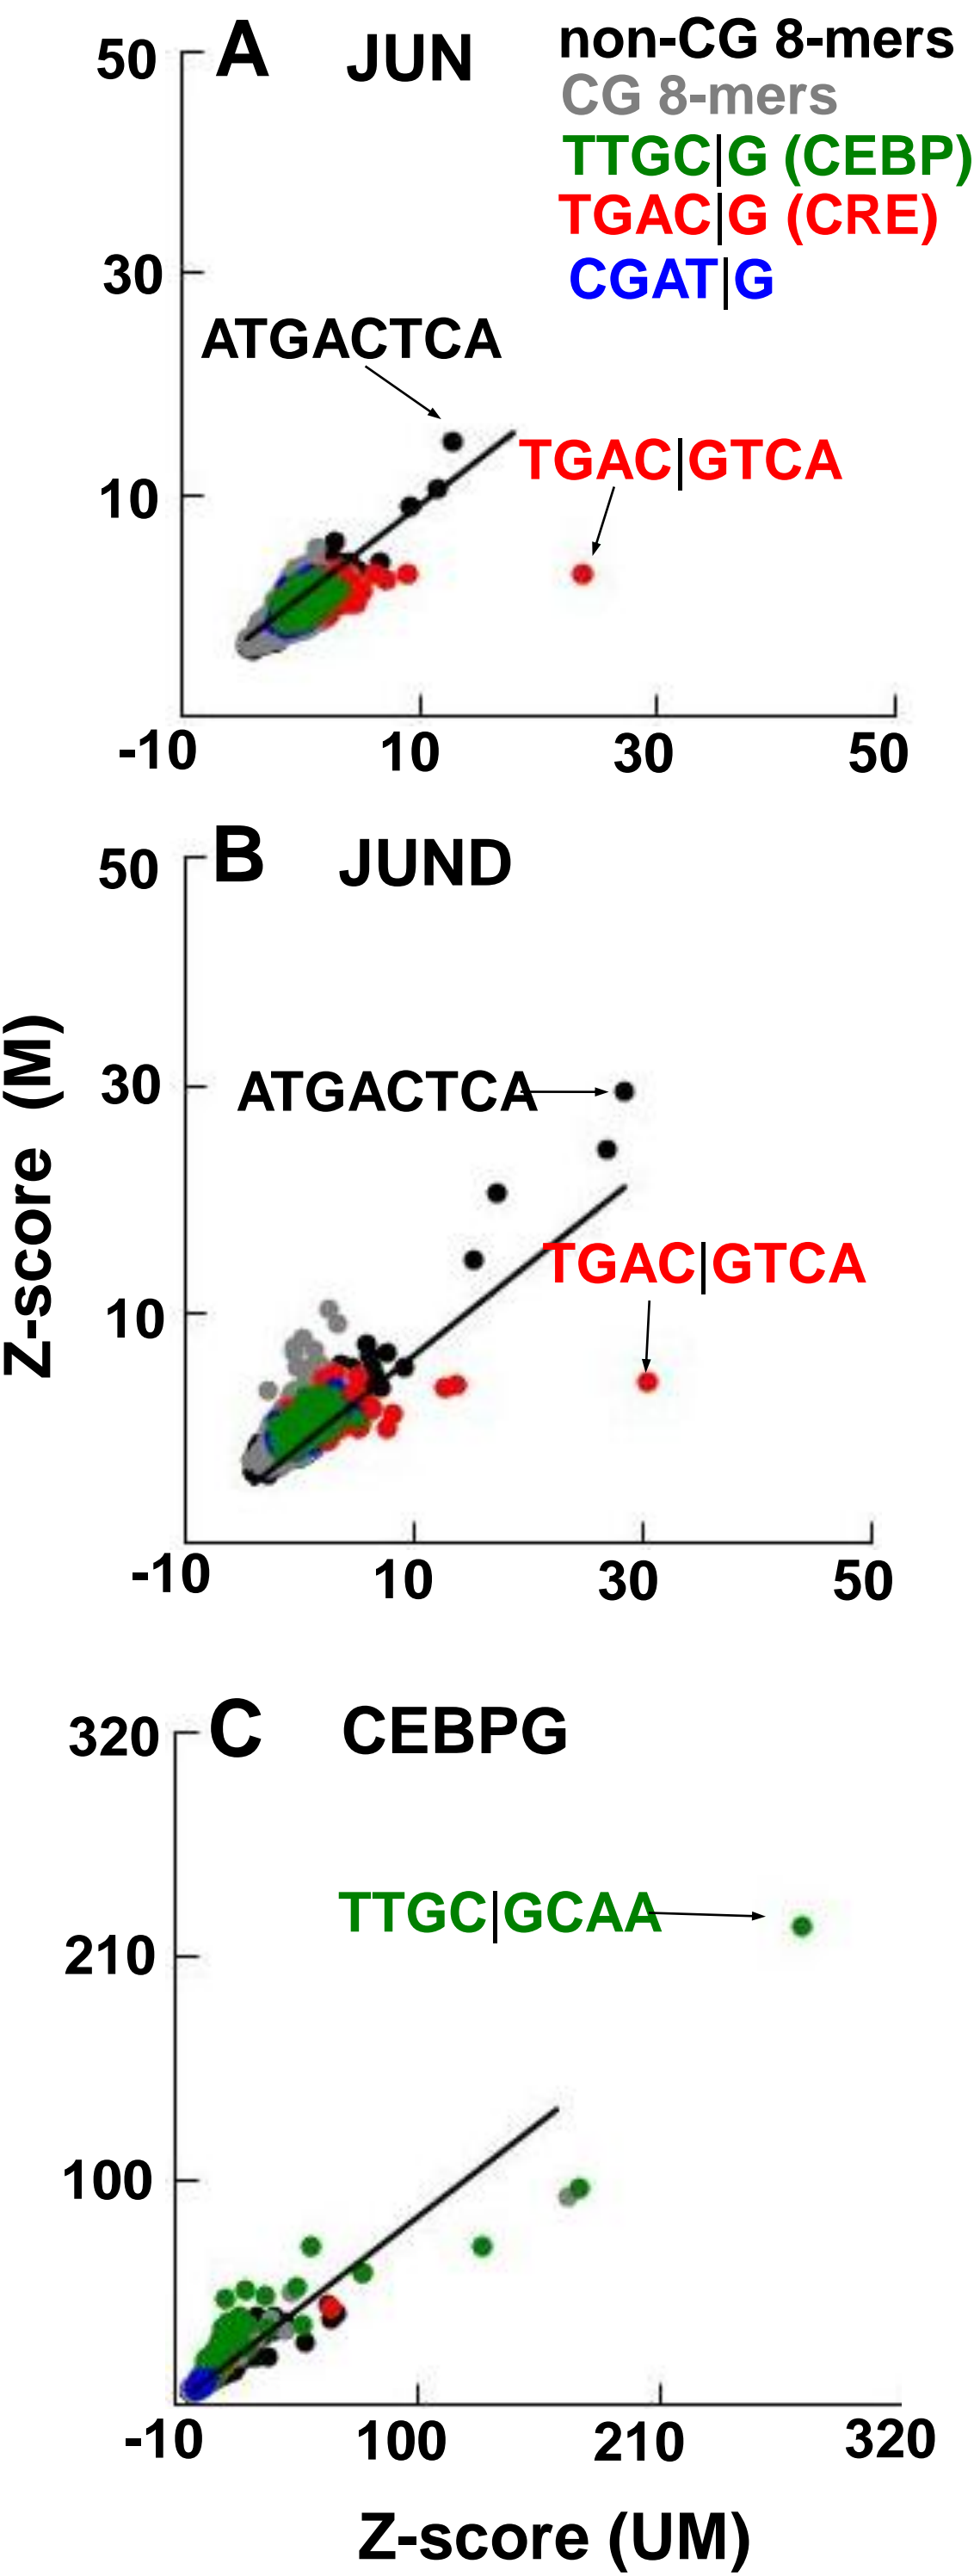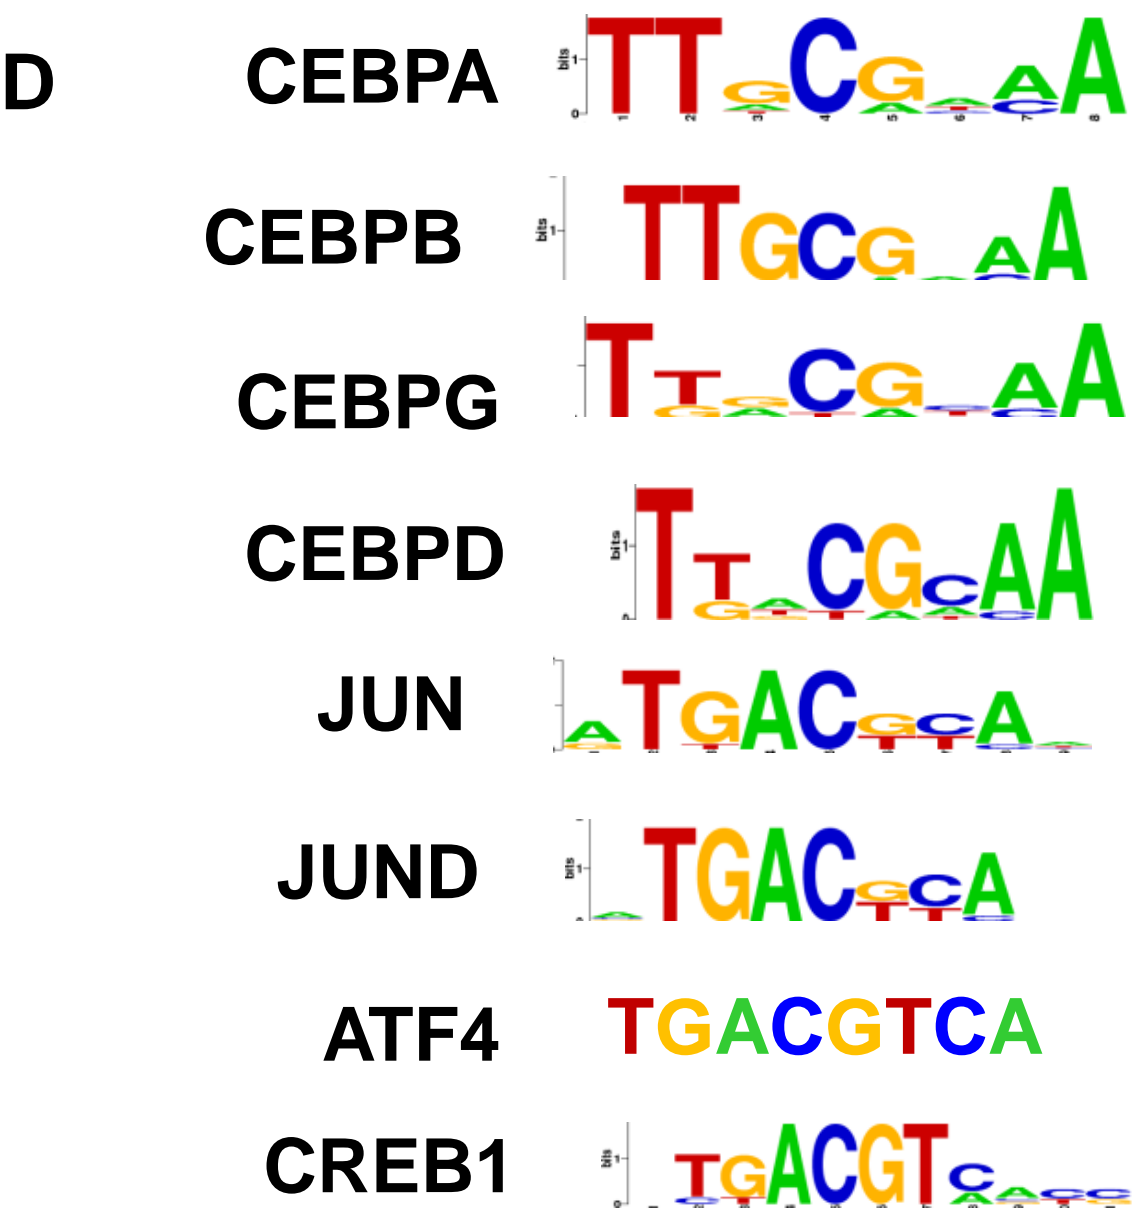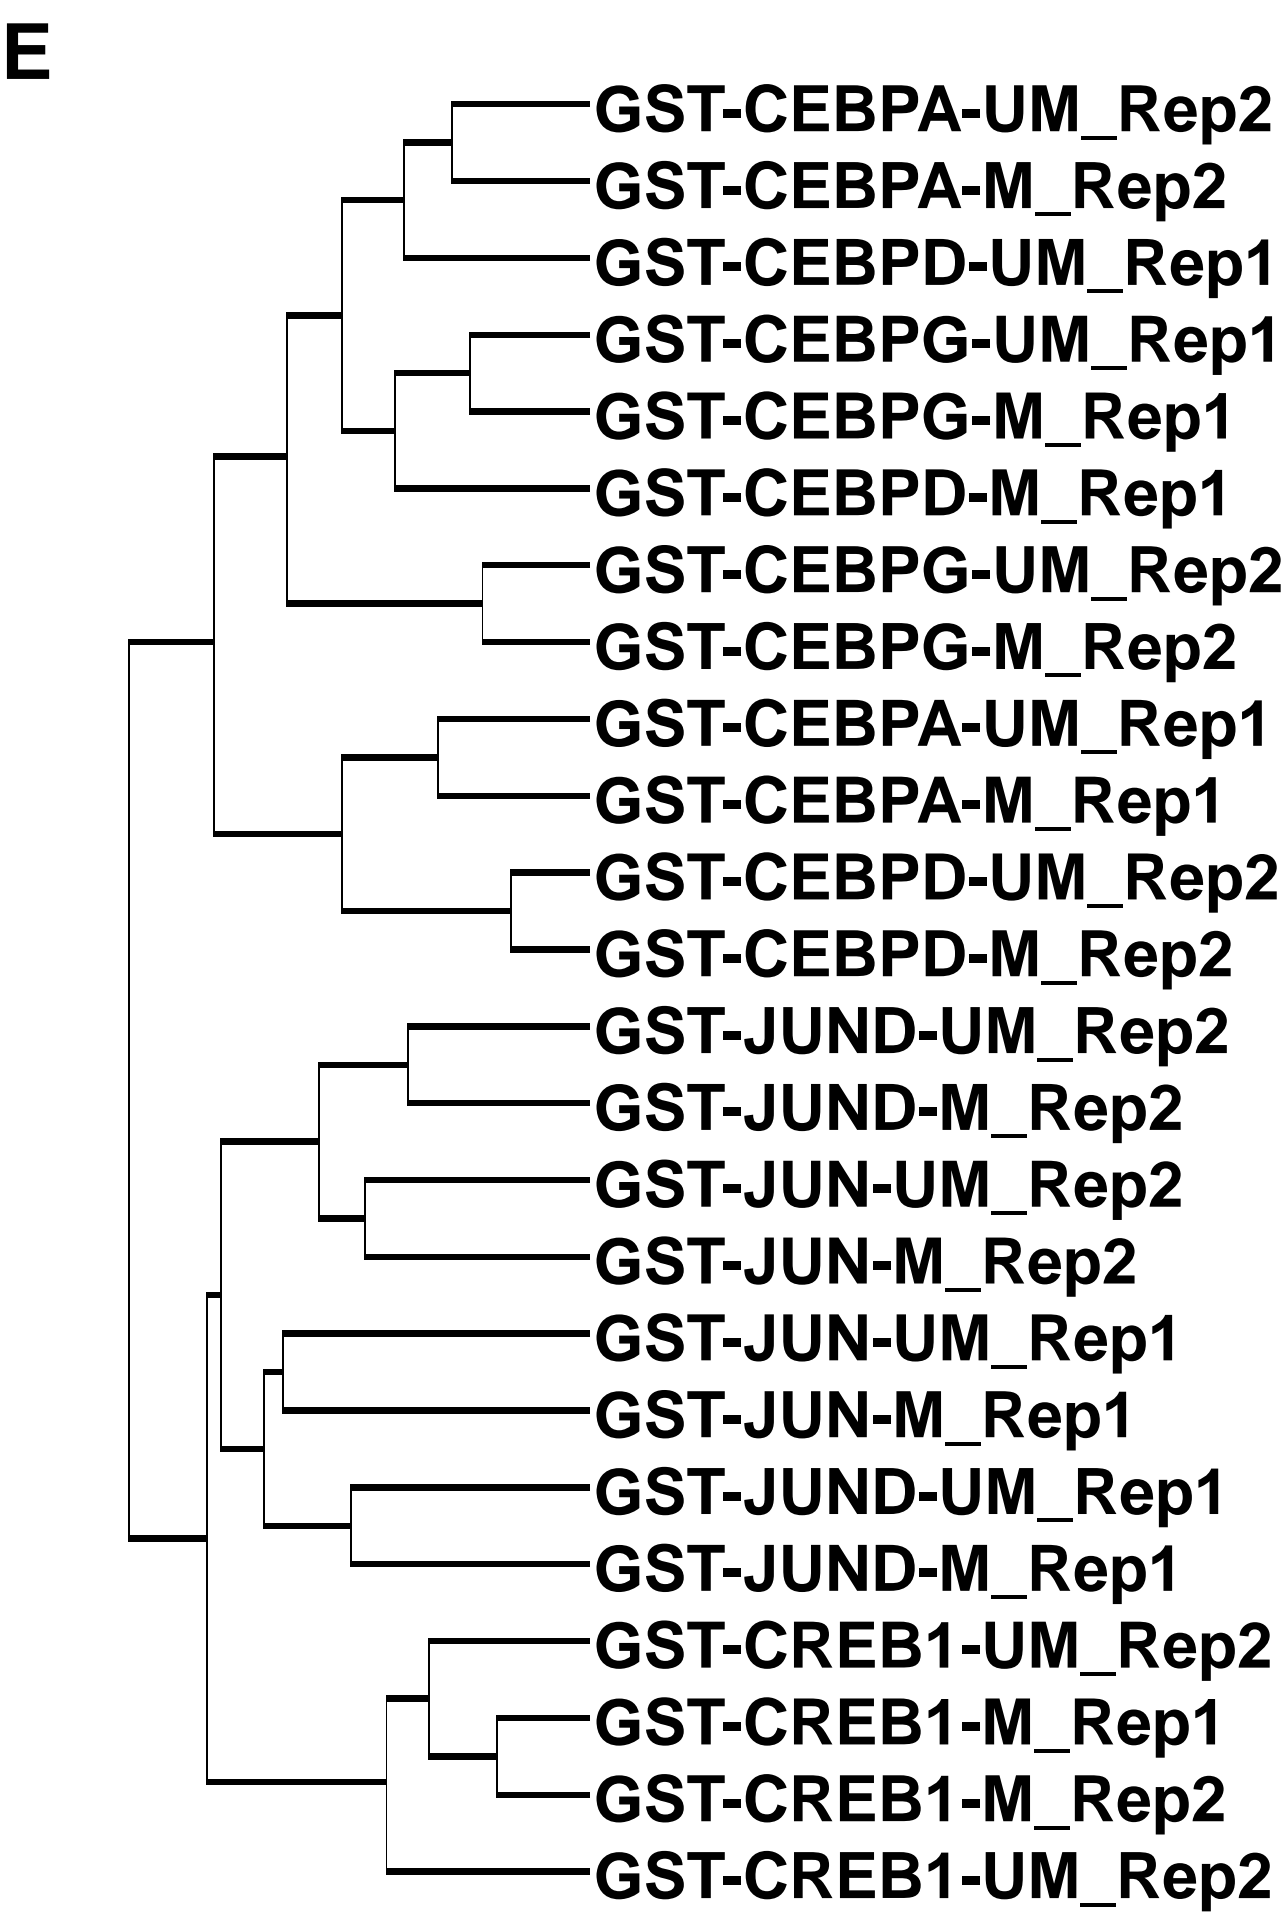



Supplementary Figure 3:

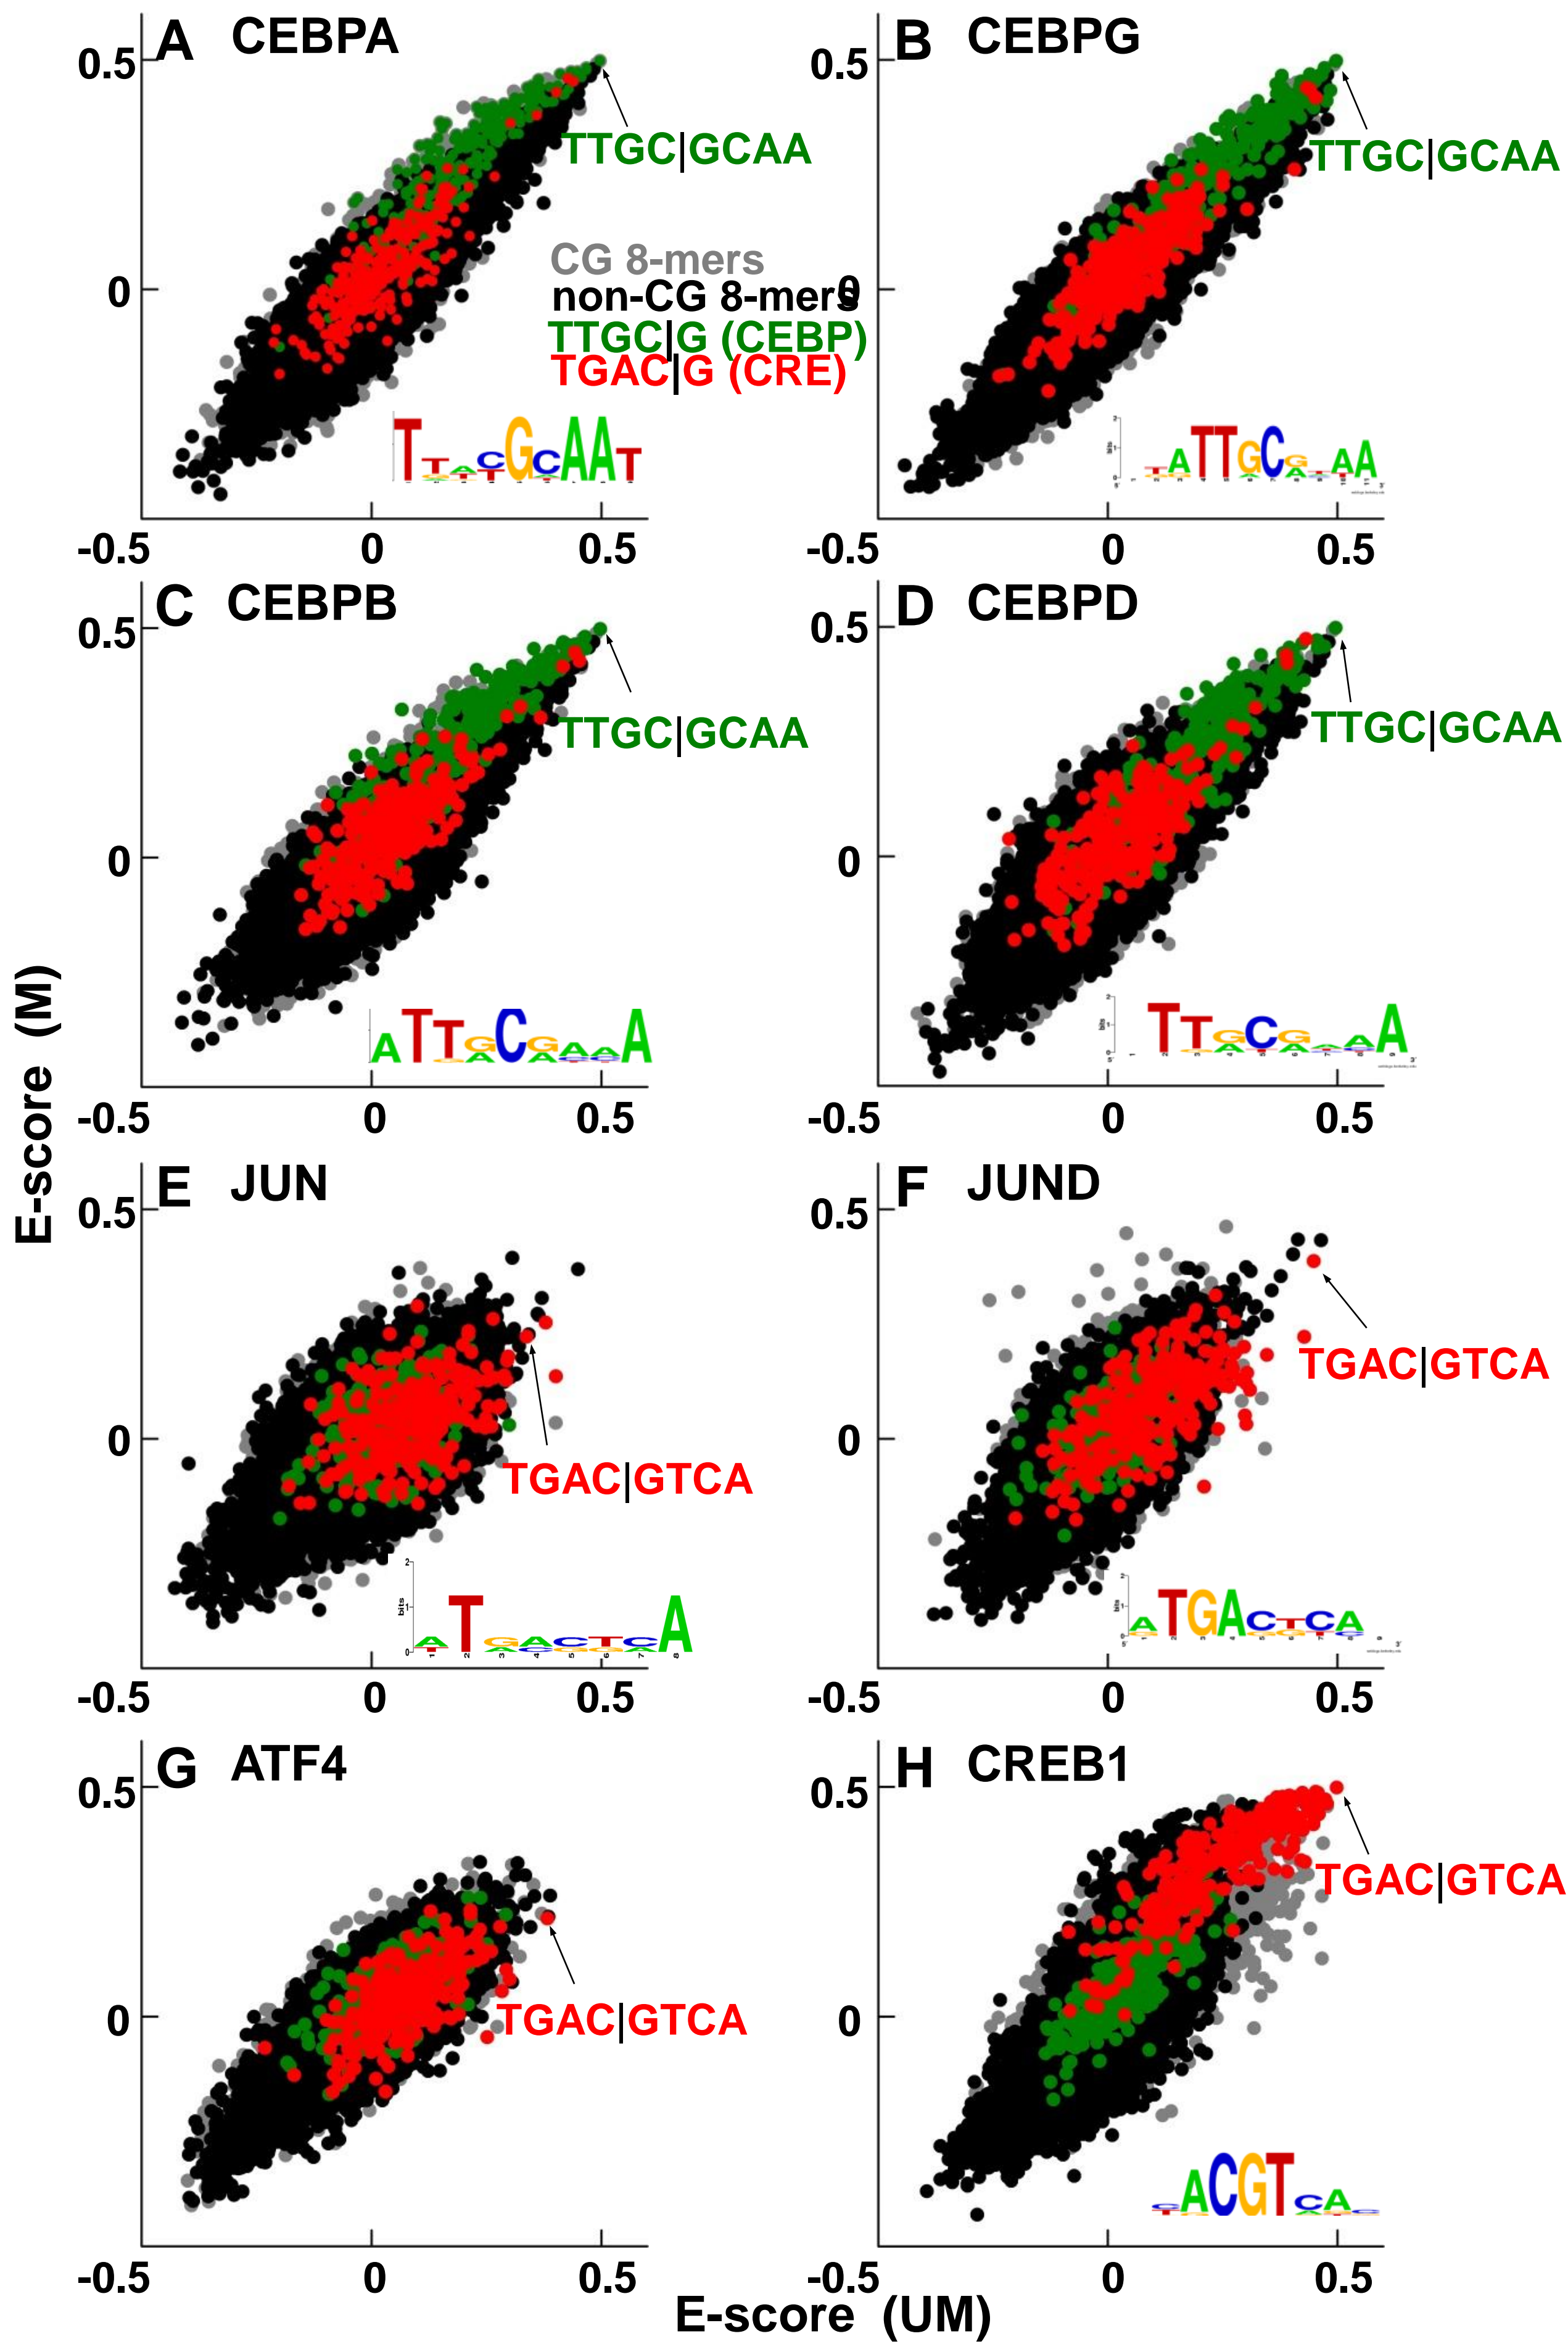

Supplementary Figure 4:

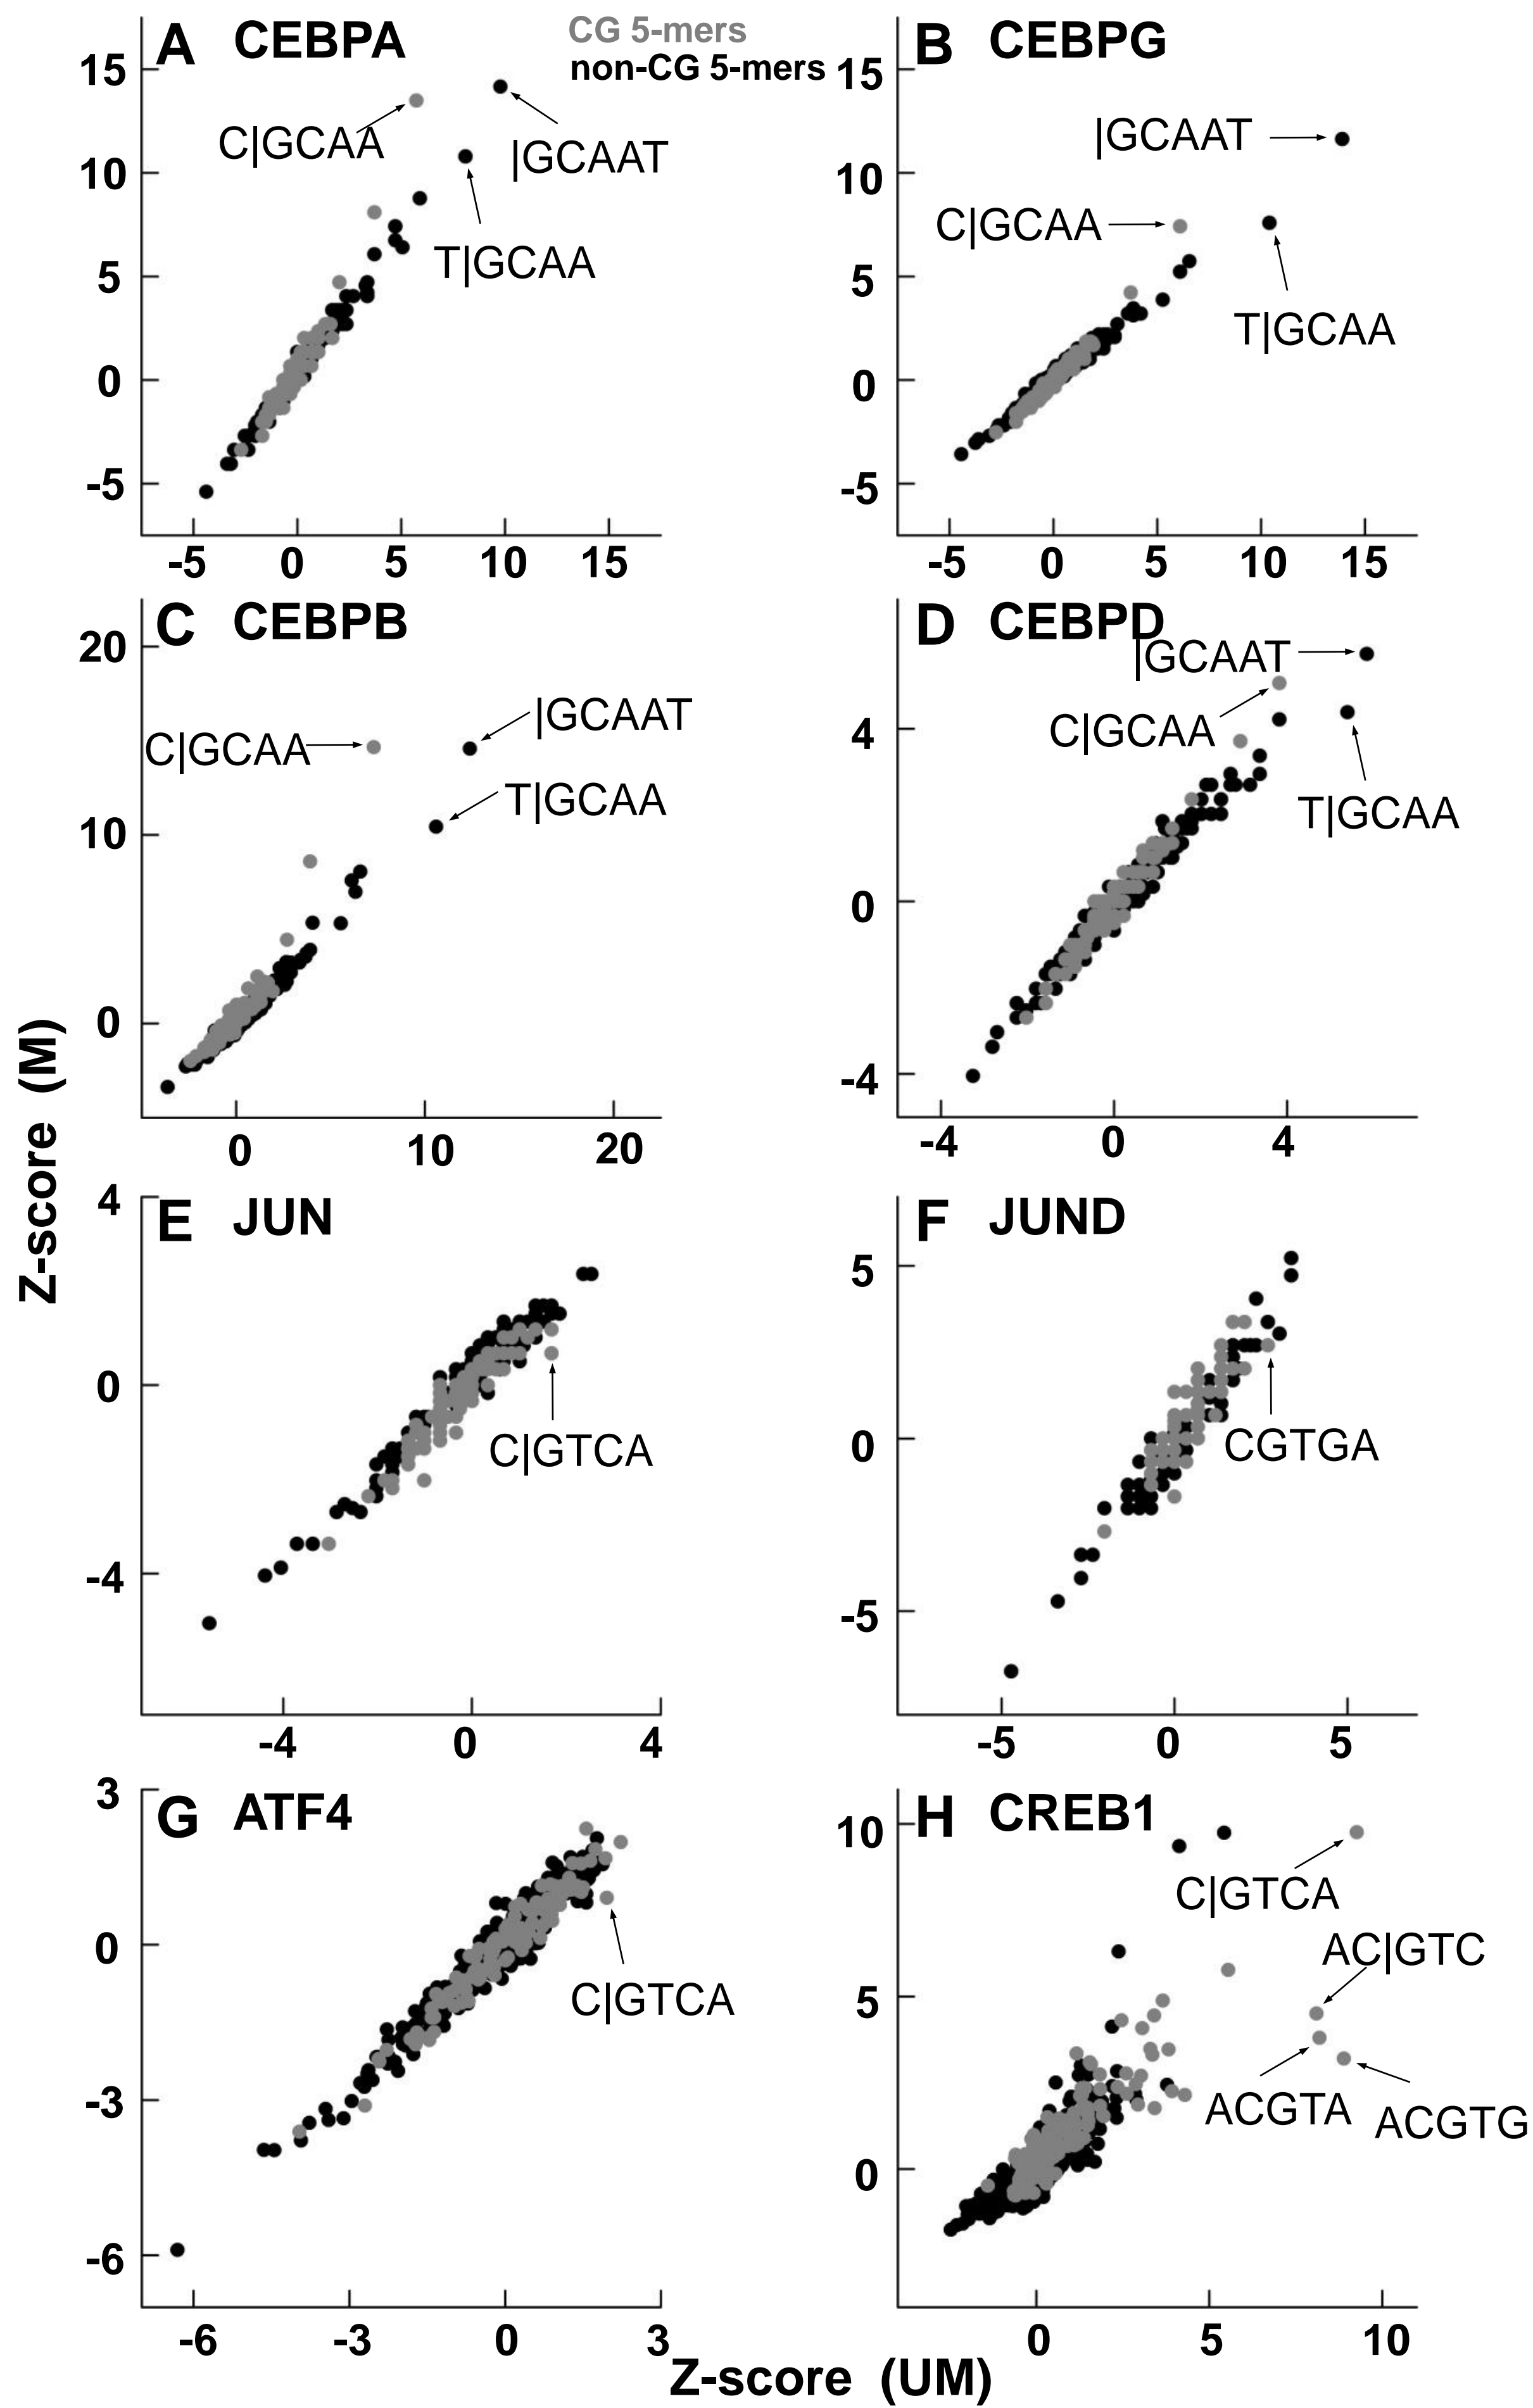



Supplementary Figure 5:

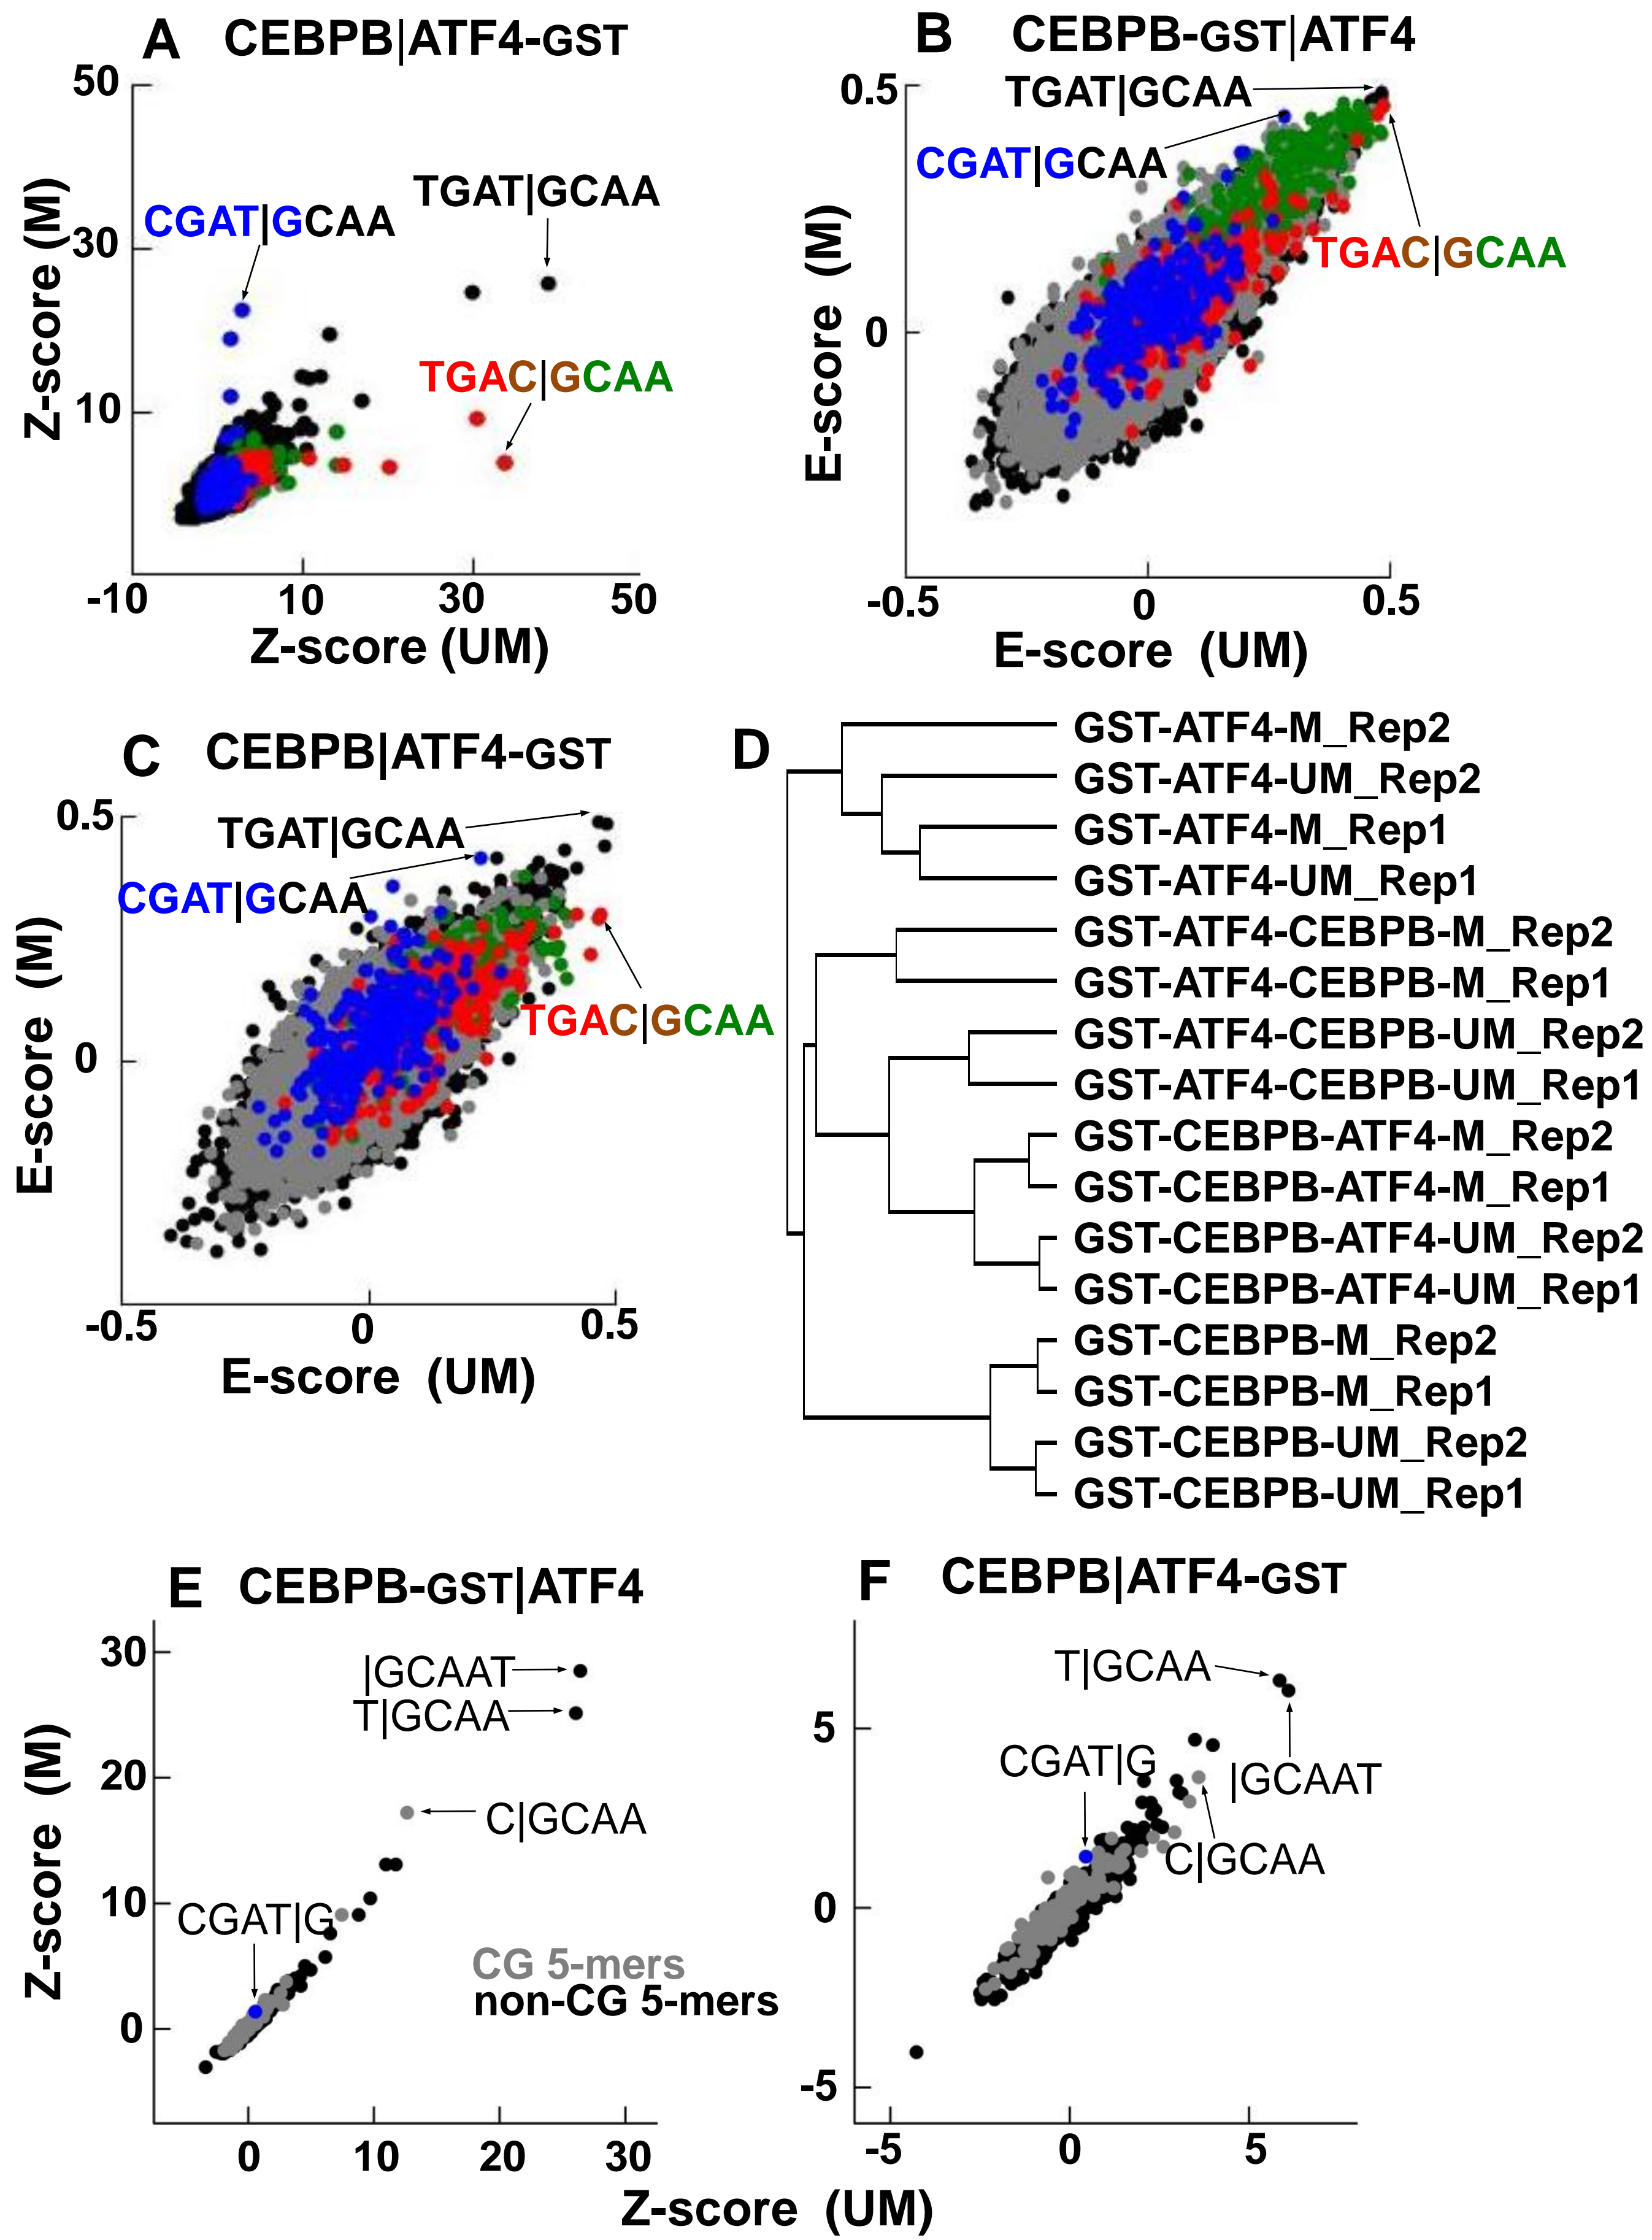

Supplementary Figure 6:

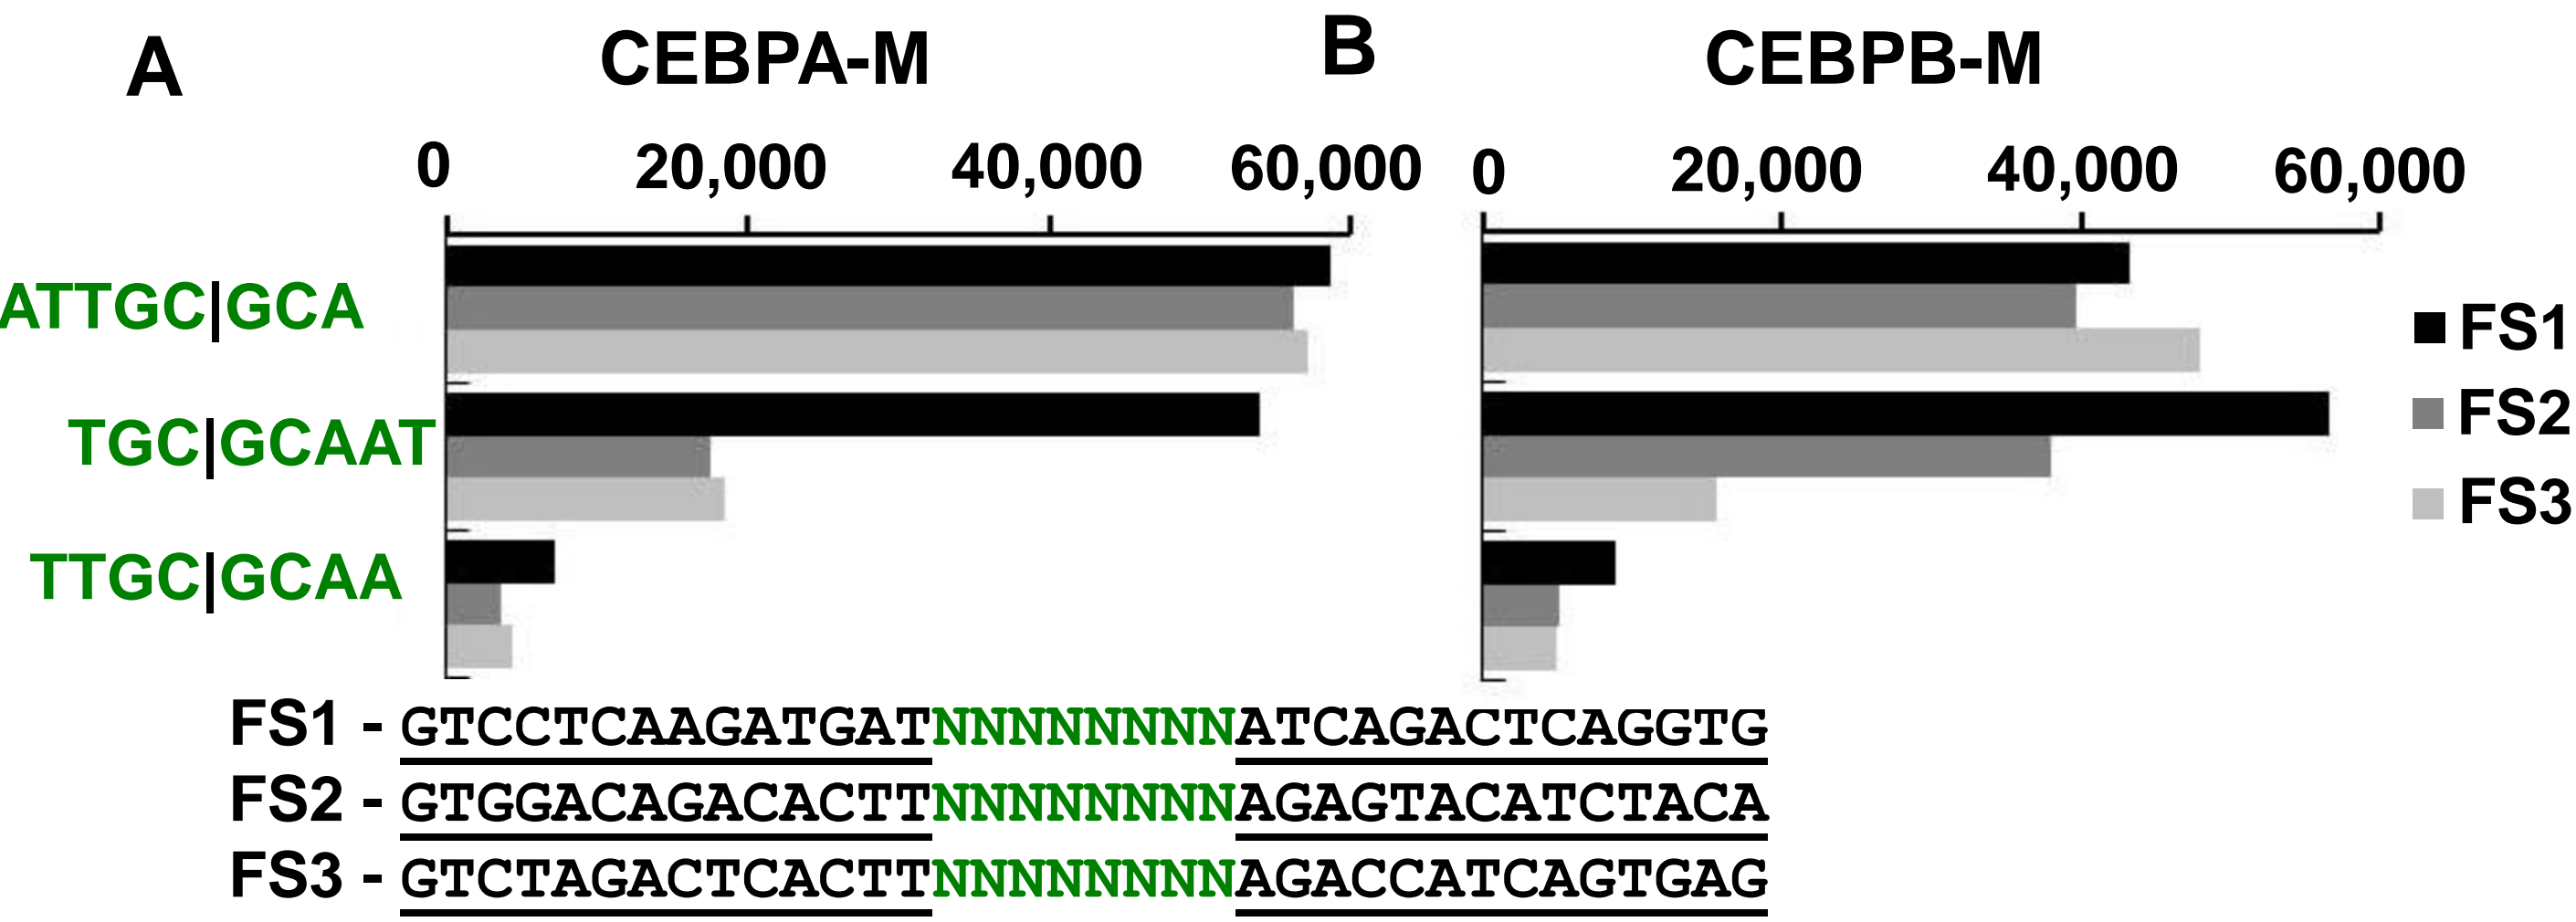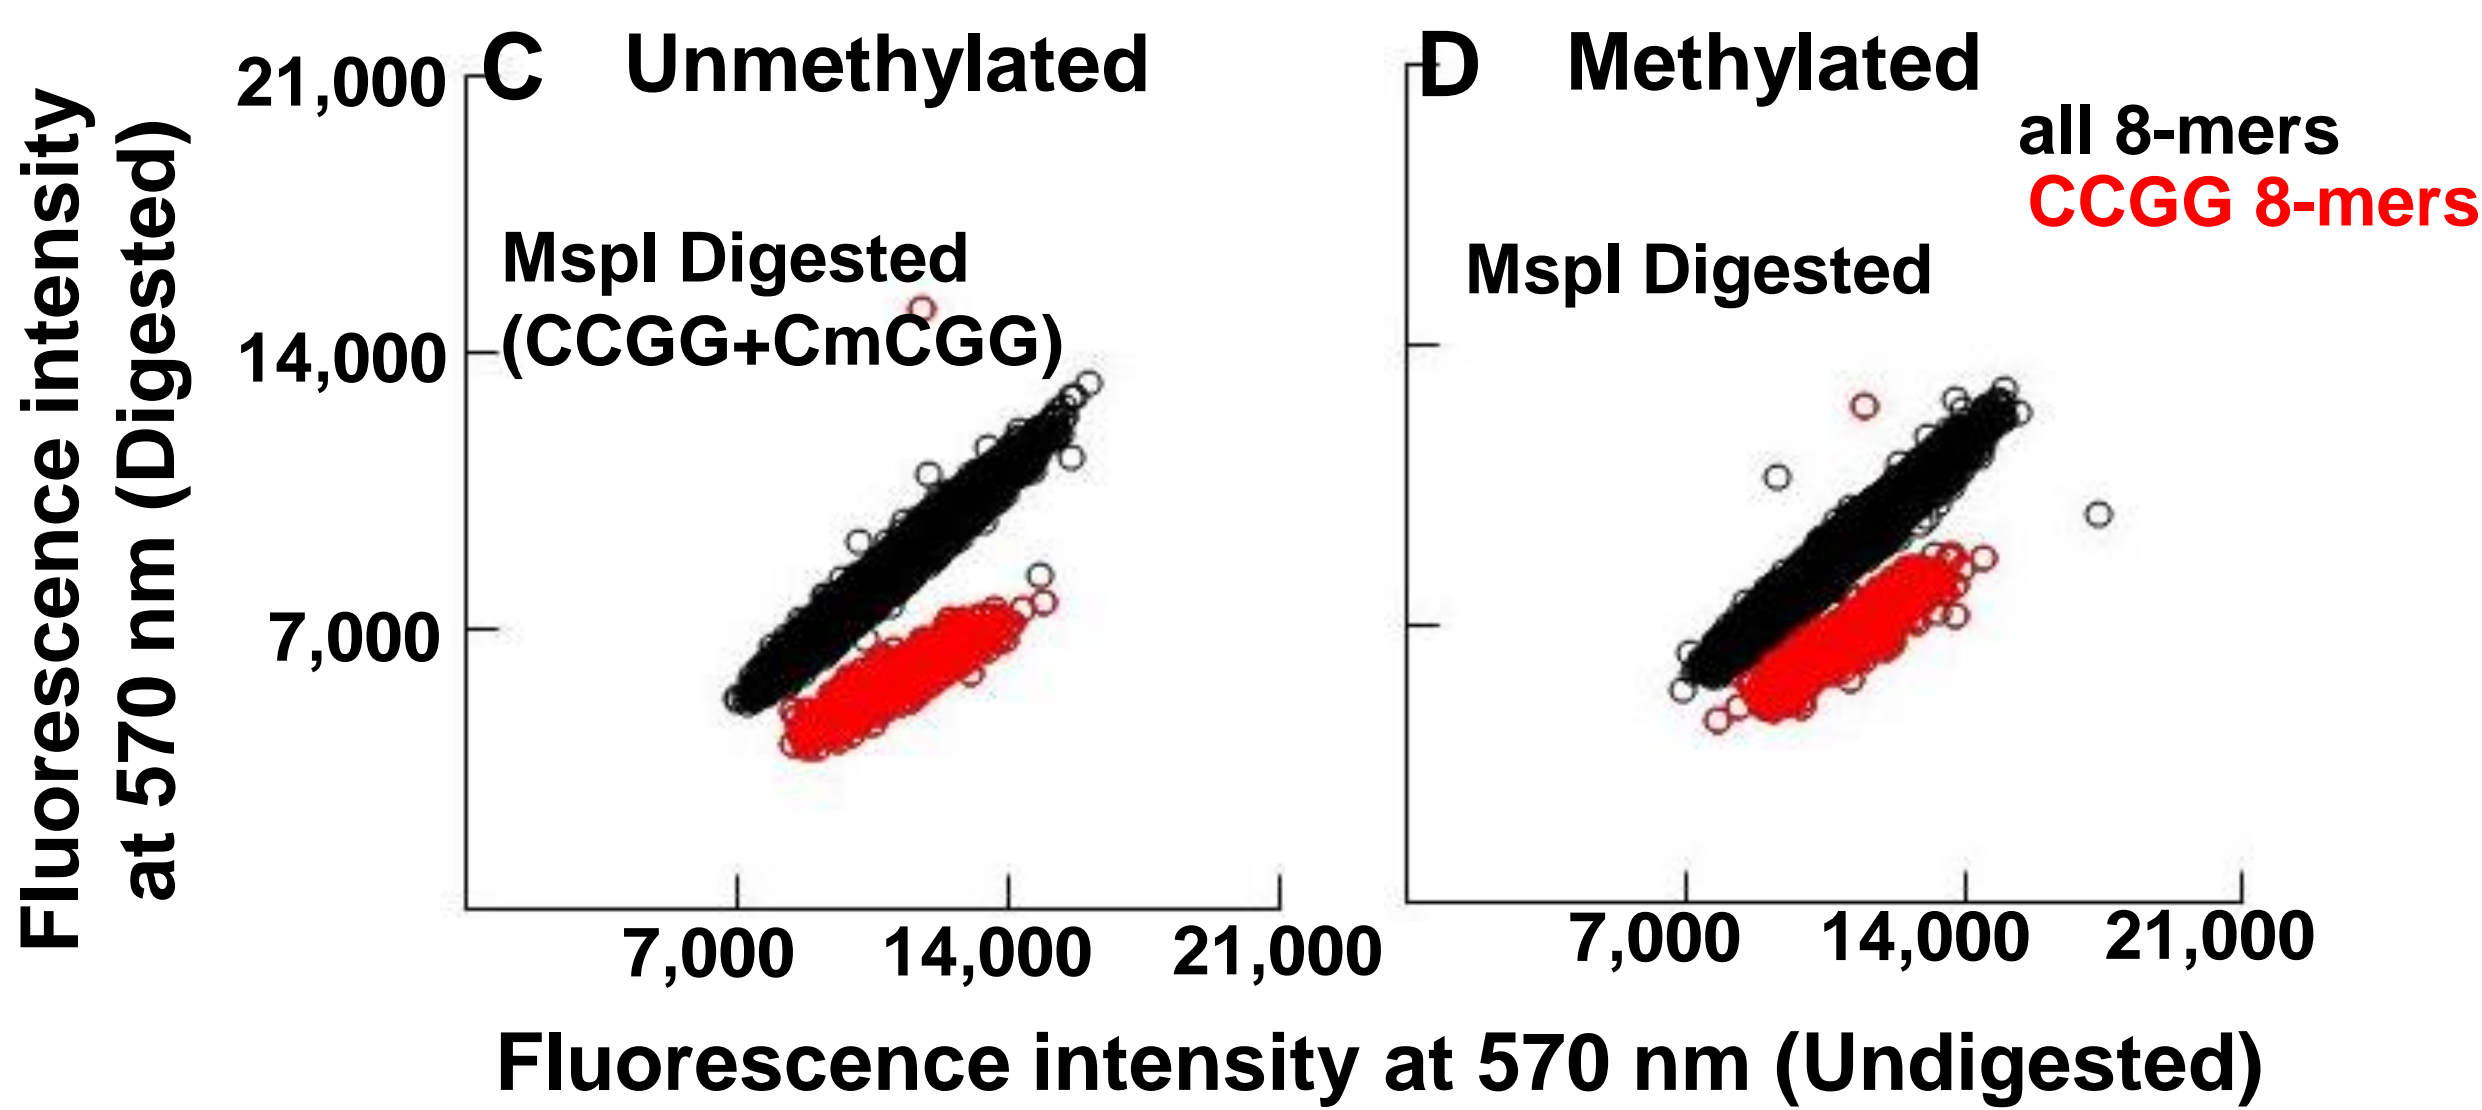

Supplementary Figure 7:

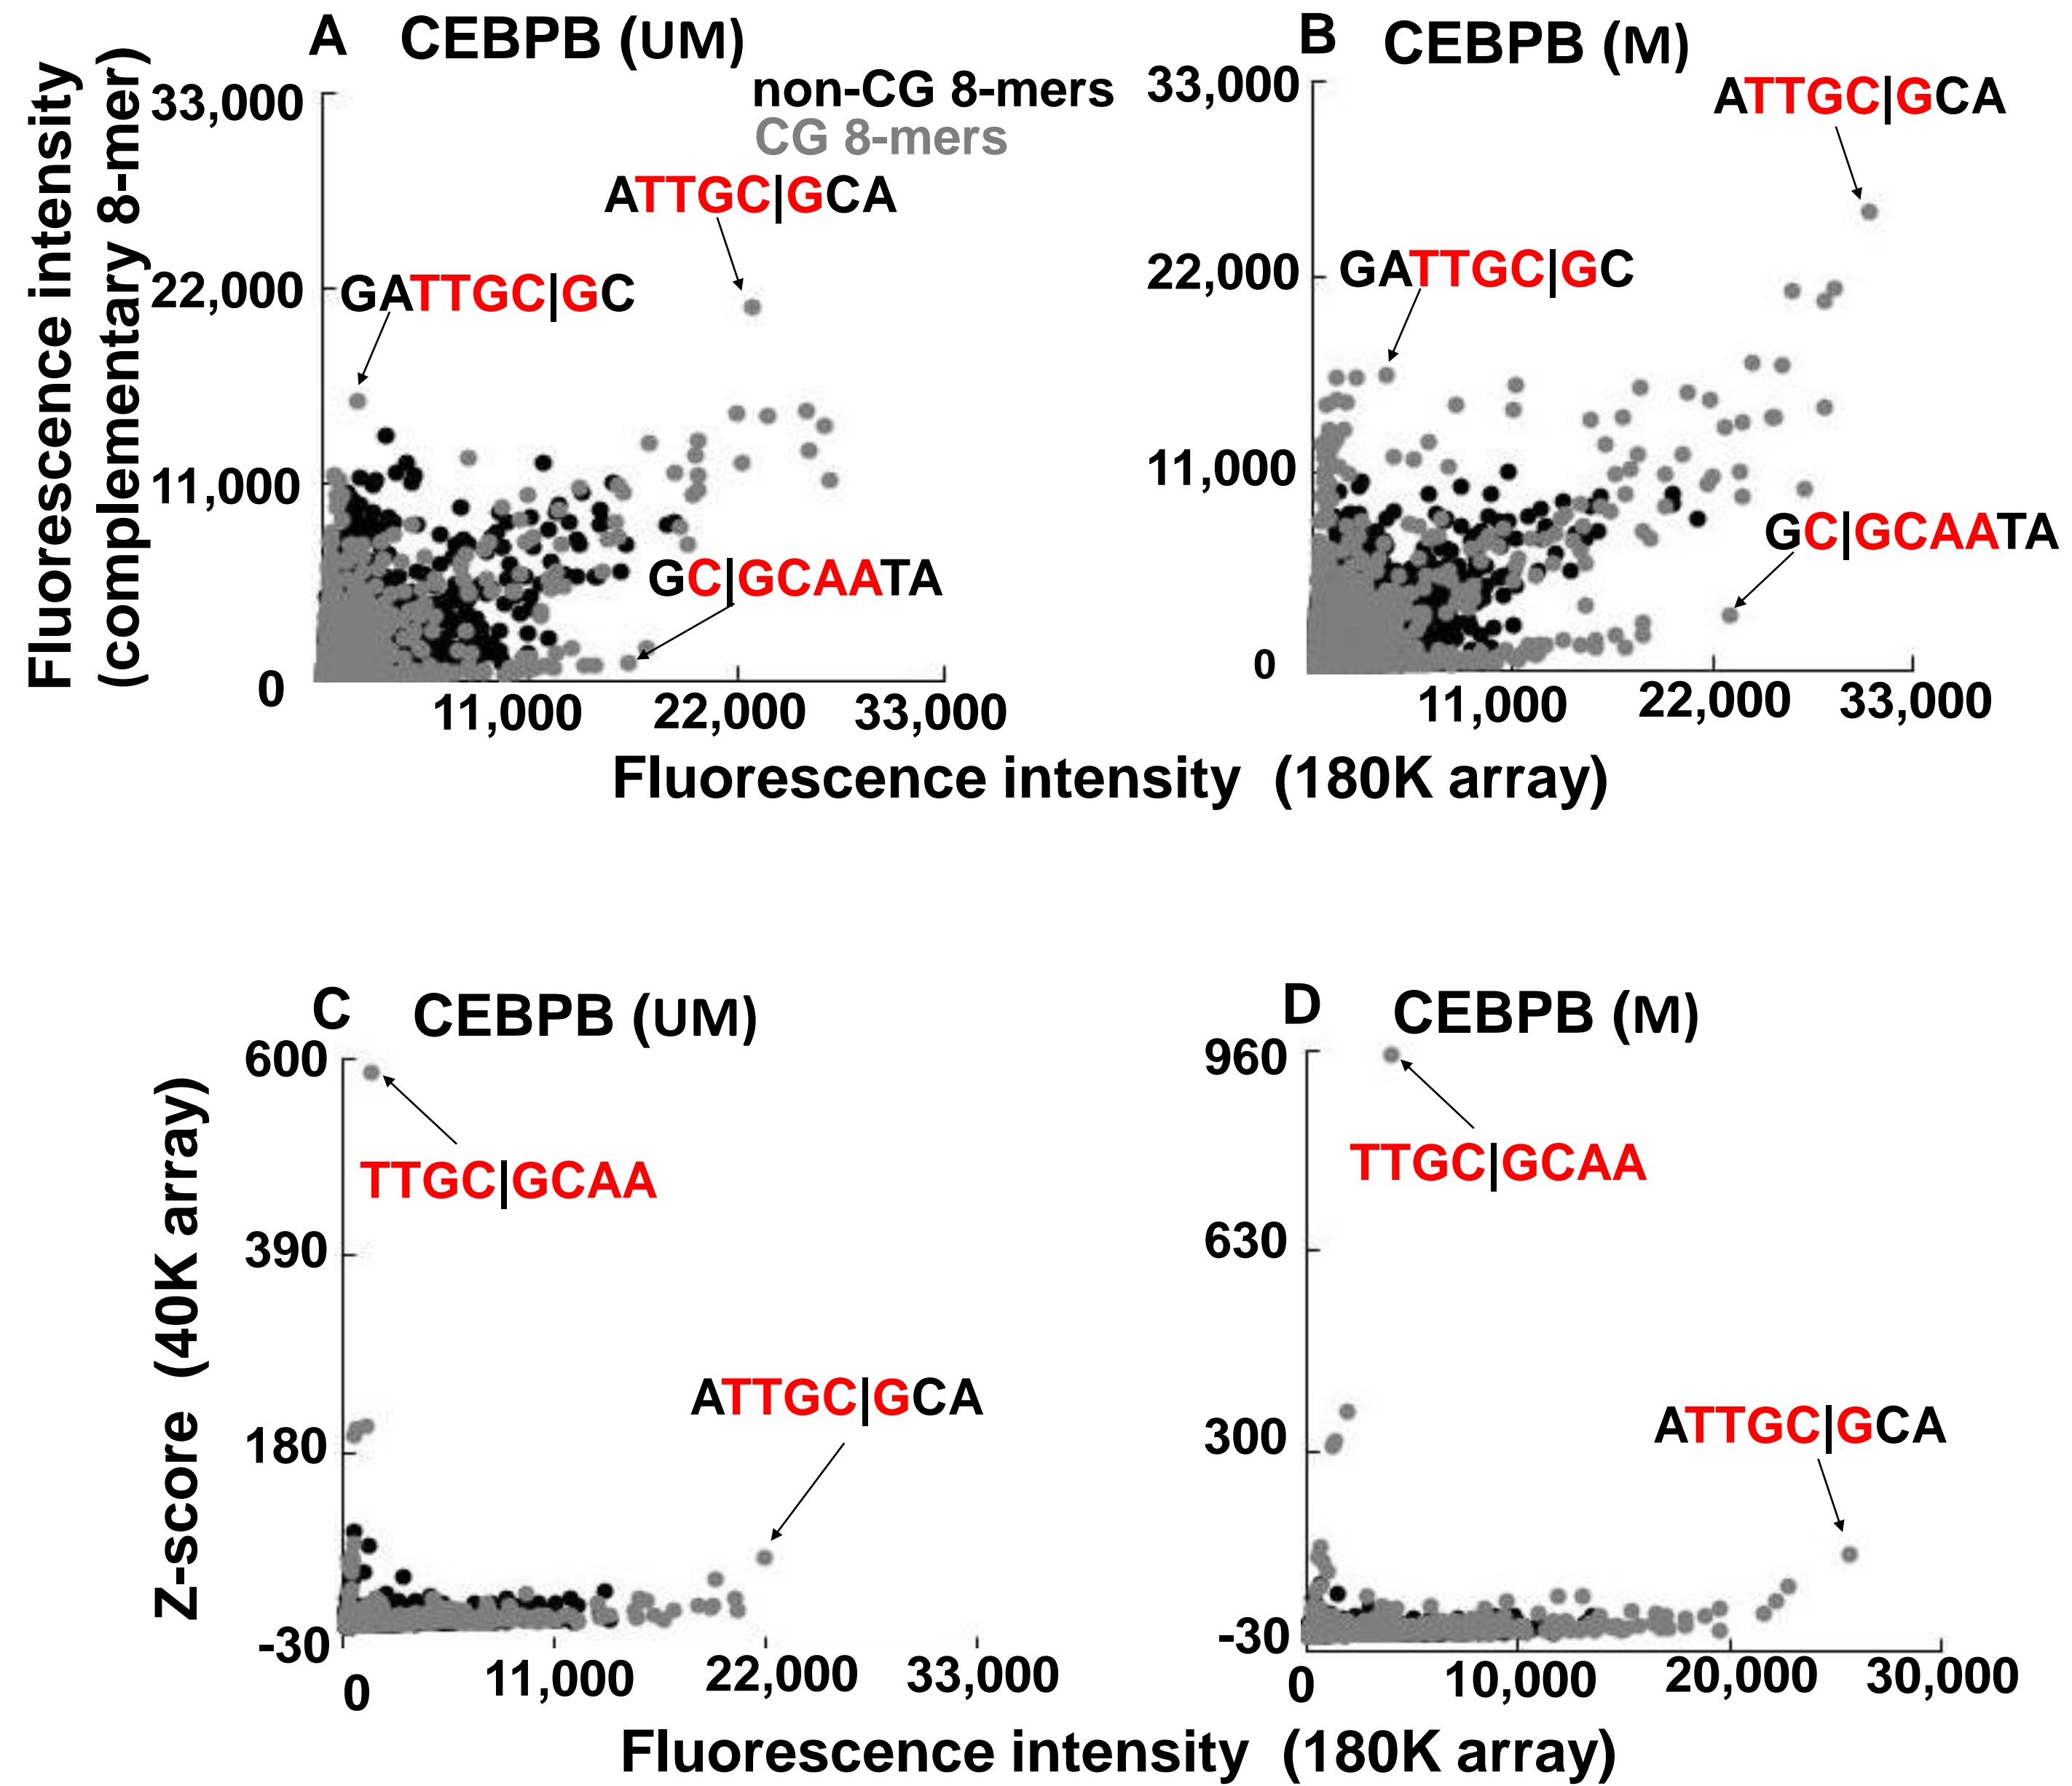



Supplementary Figure 8:

non-CG 8-mers  
CG 8-mers  
TTGC|G (C/EBP)  
TGAC|G (CRE)  
CGAT|G

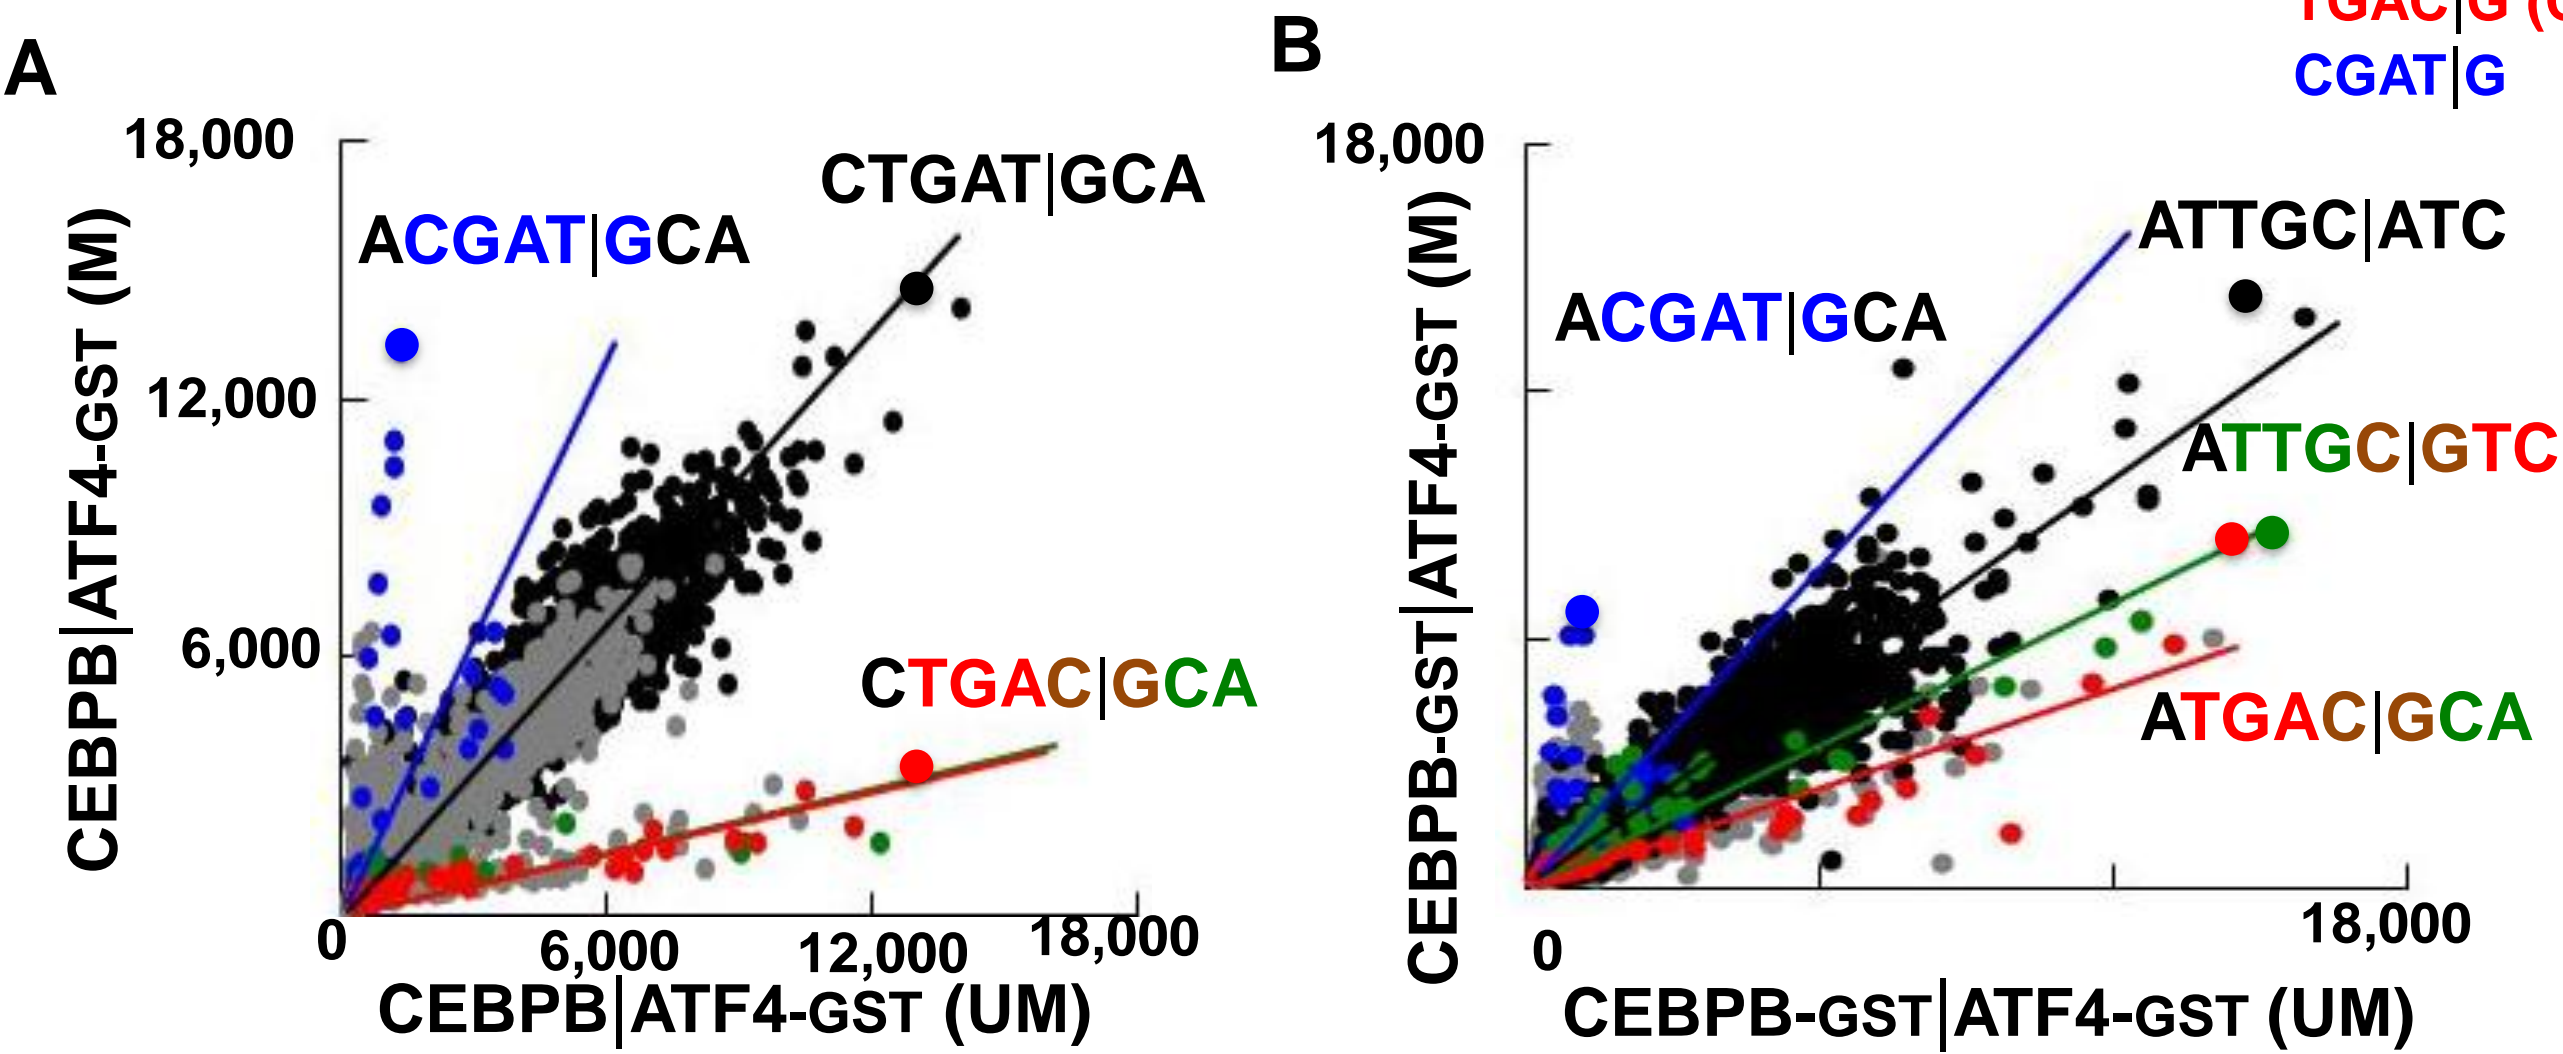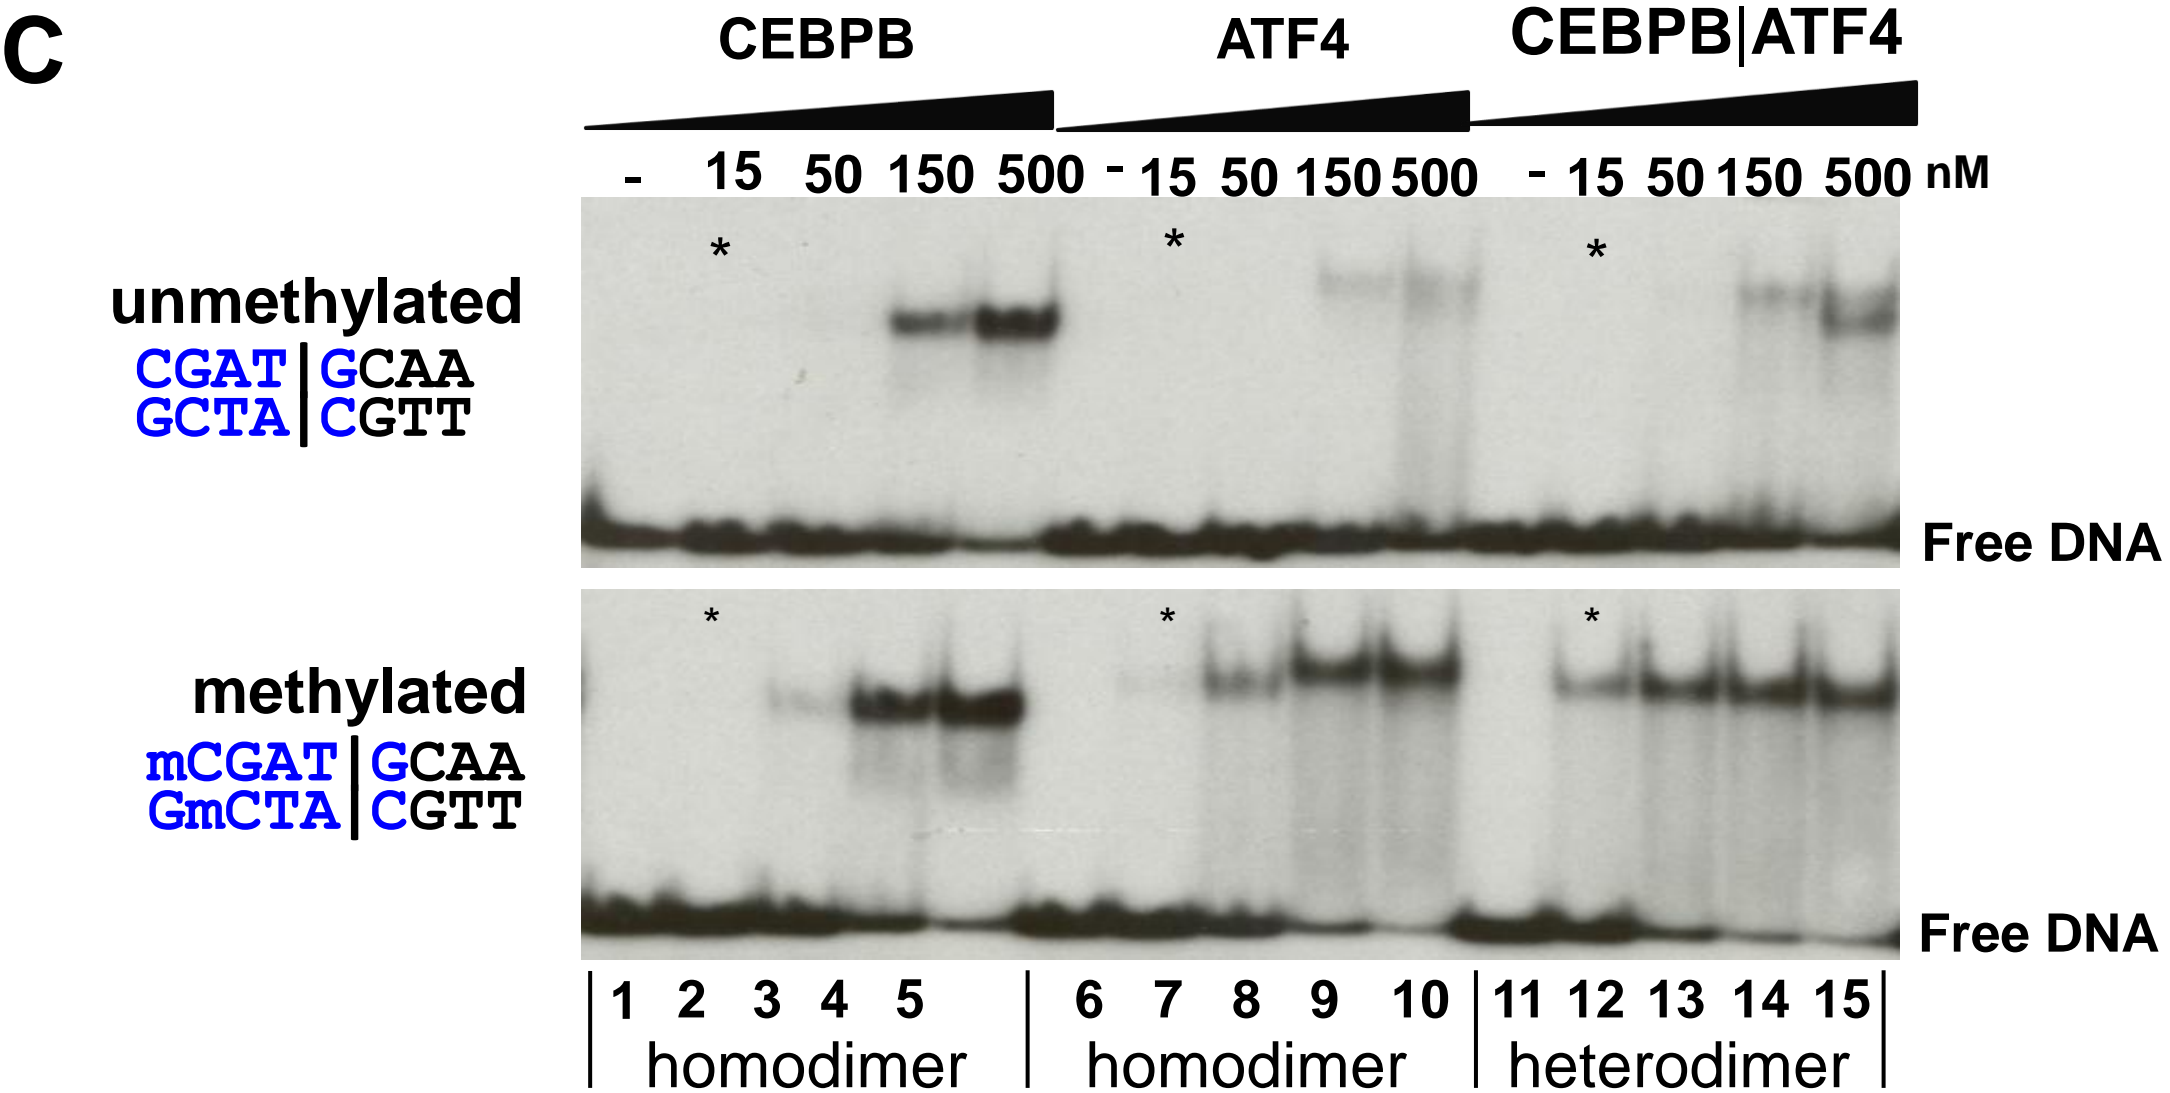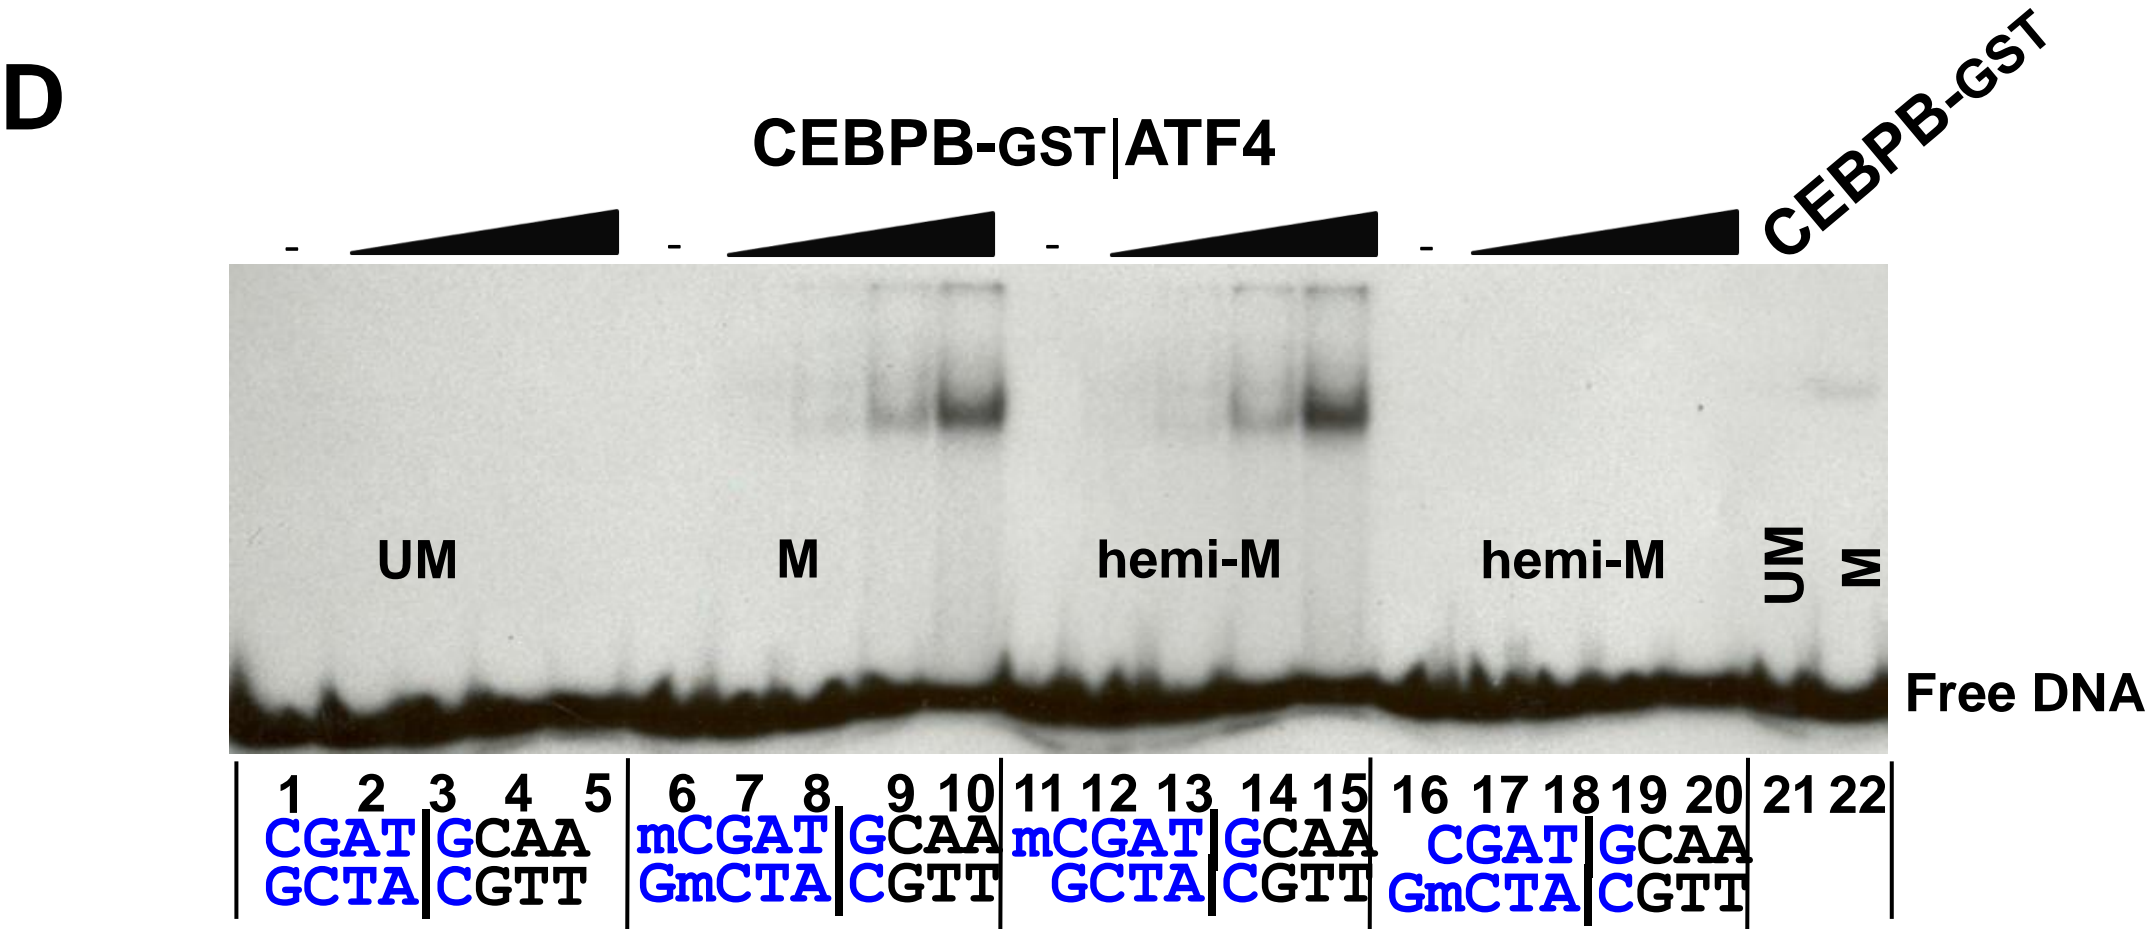

Supplementary Figure 9:

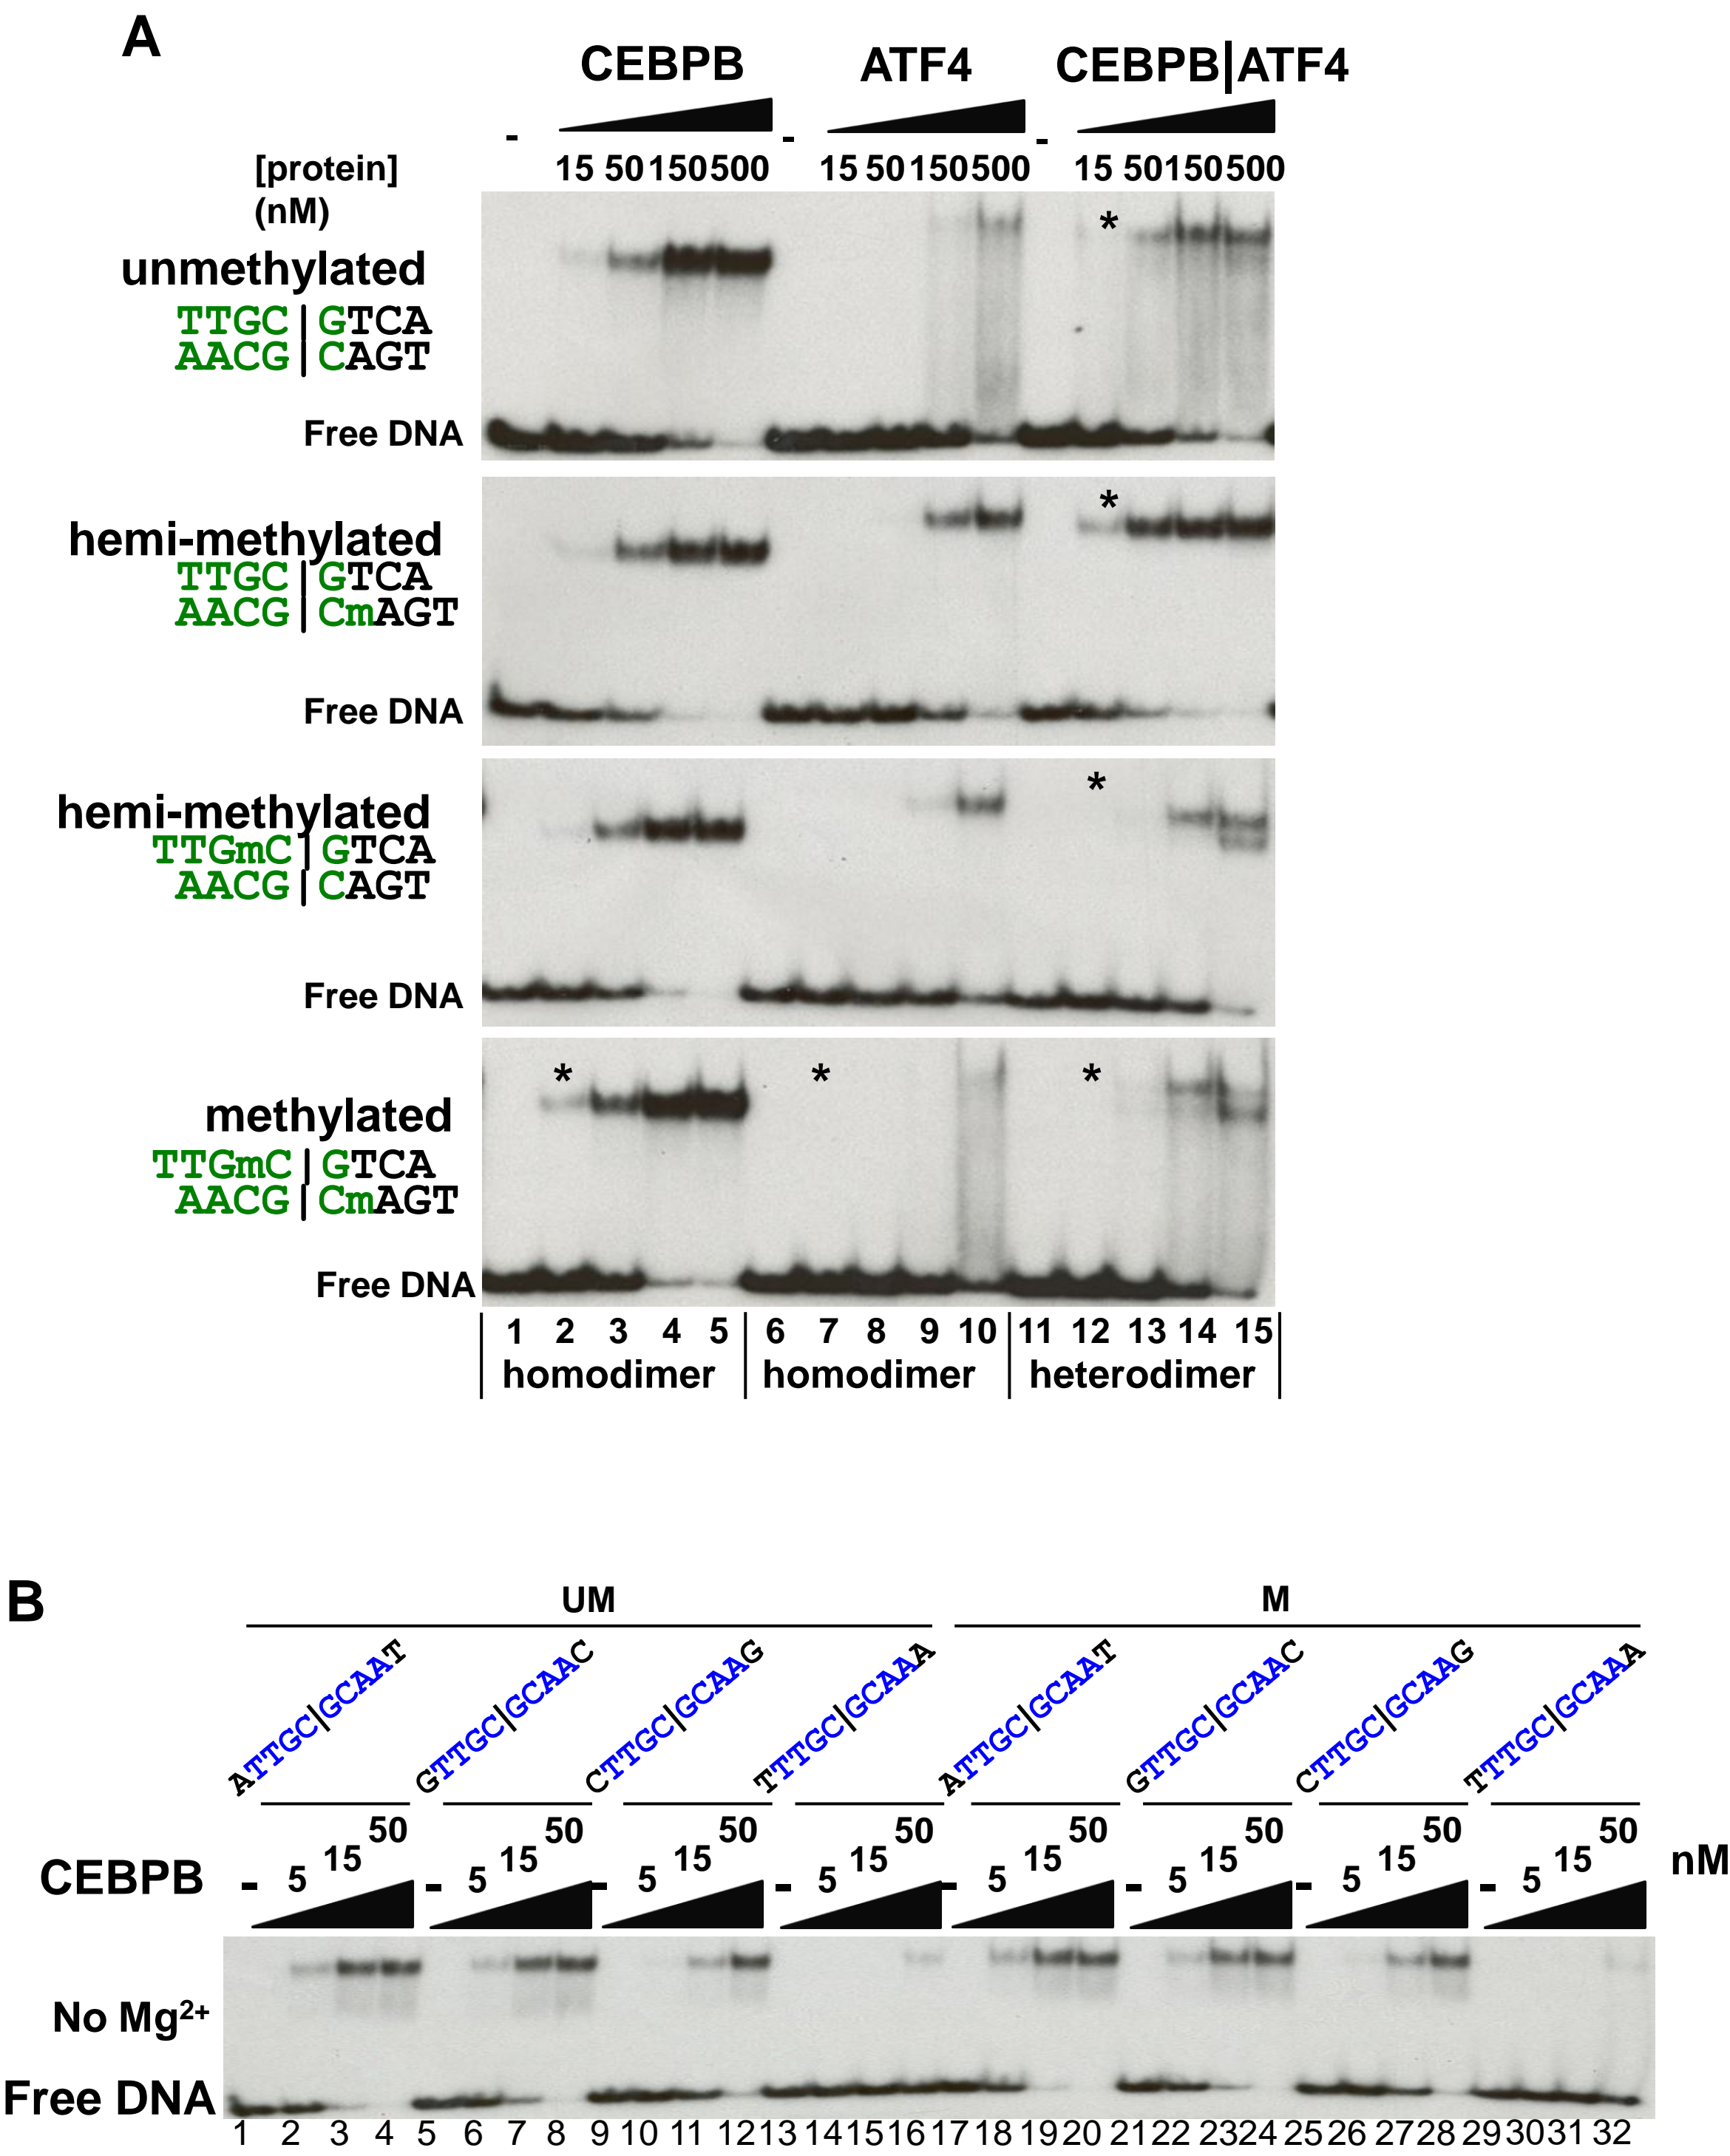



Supplementary Figure 10:

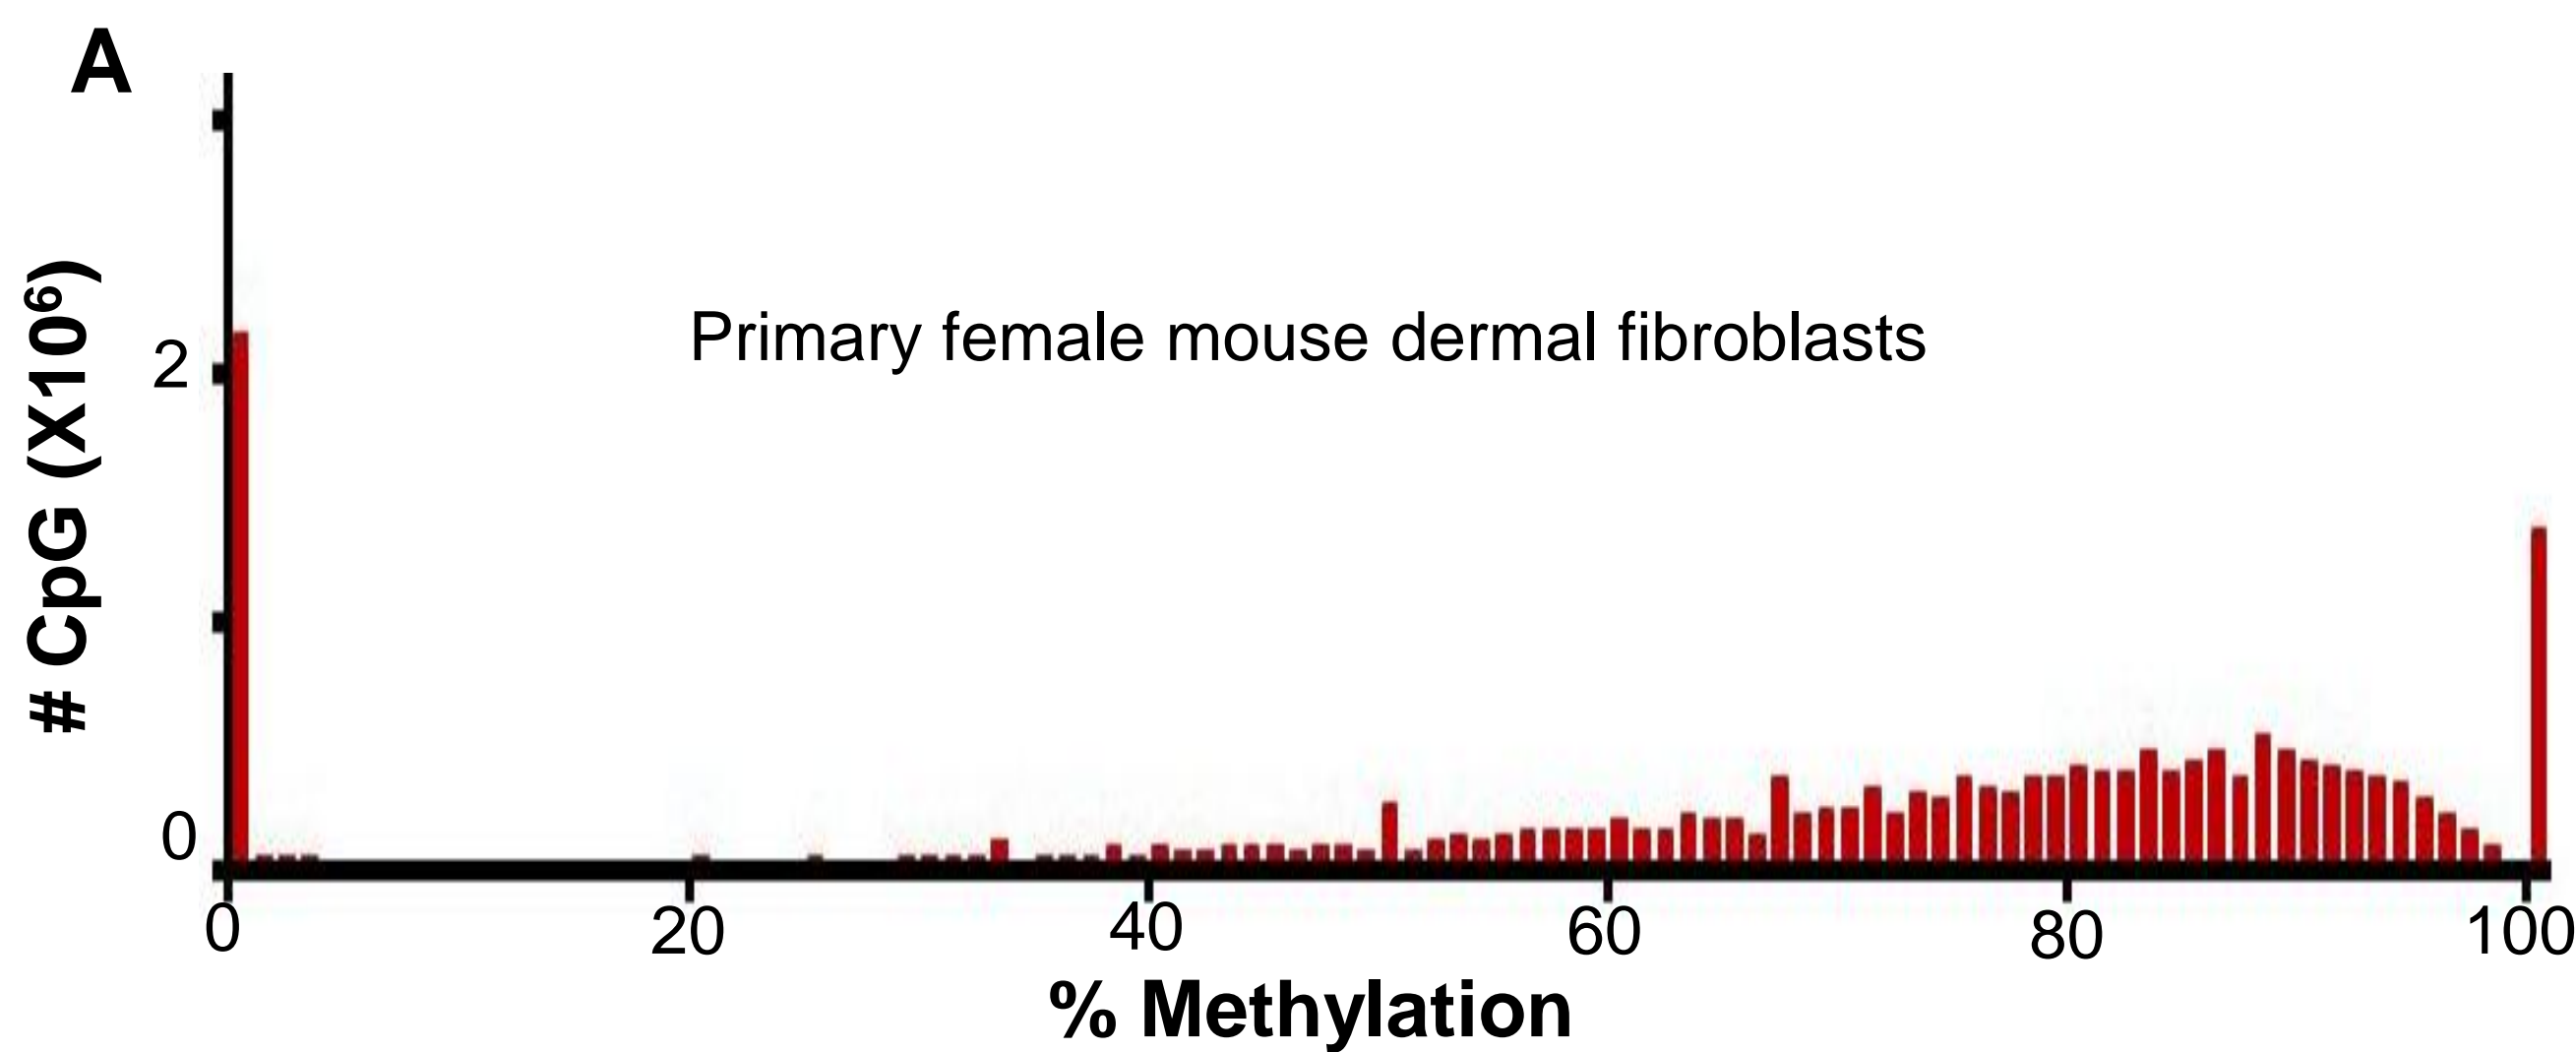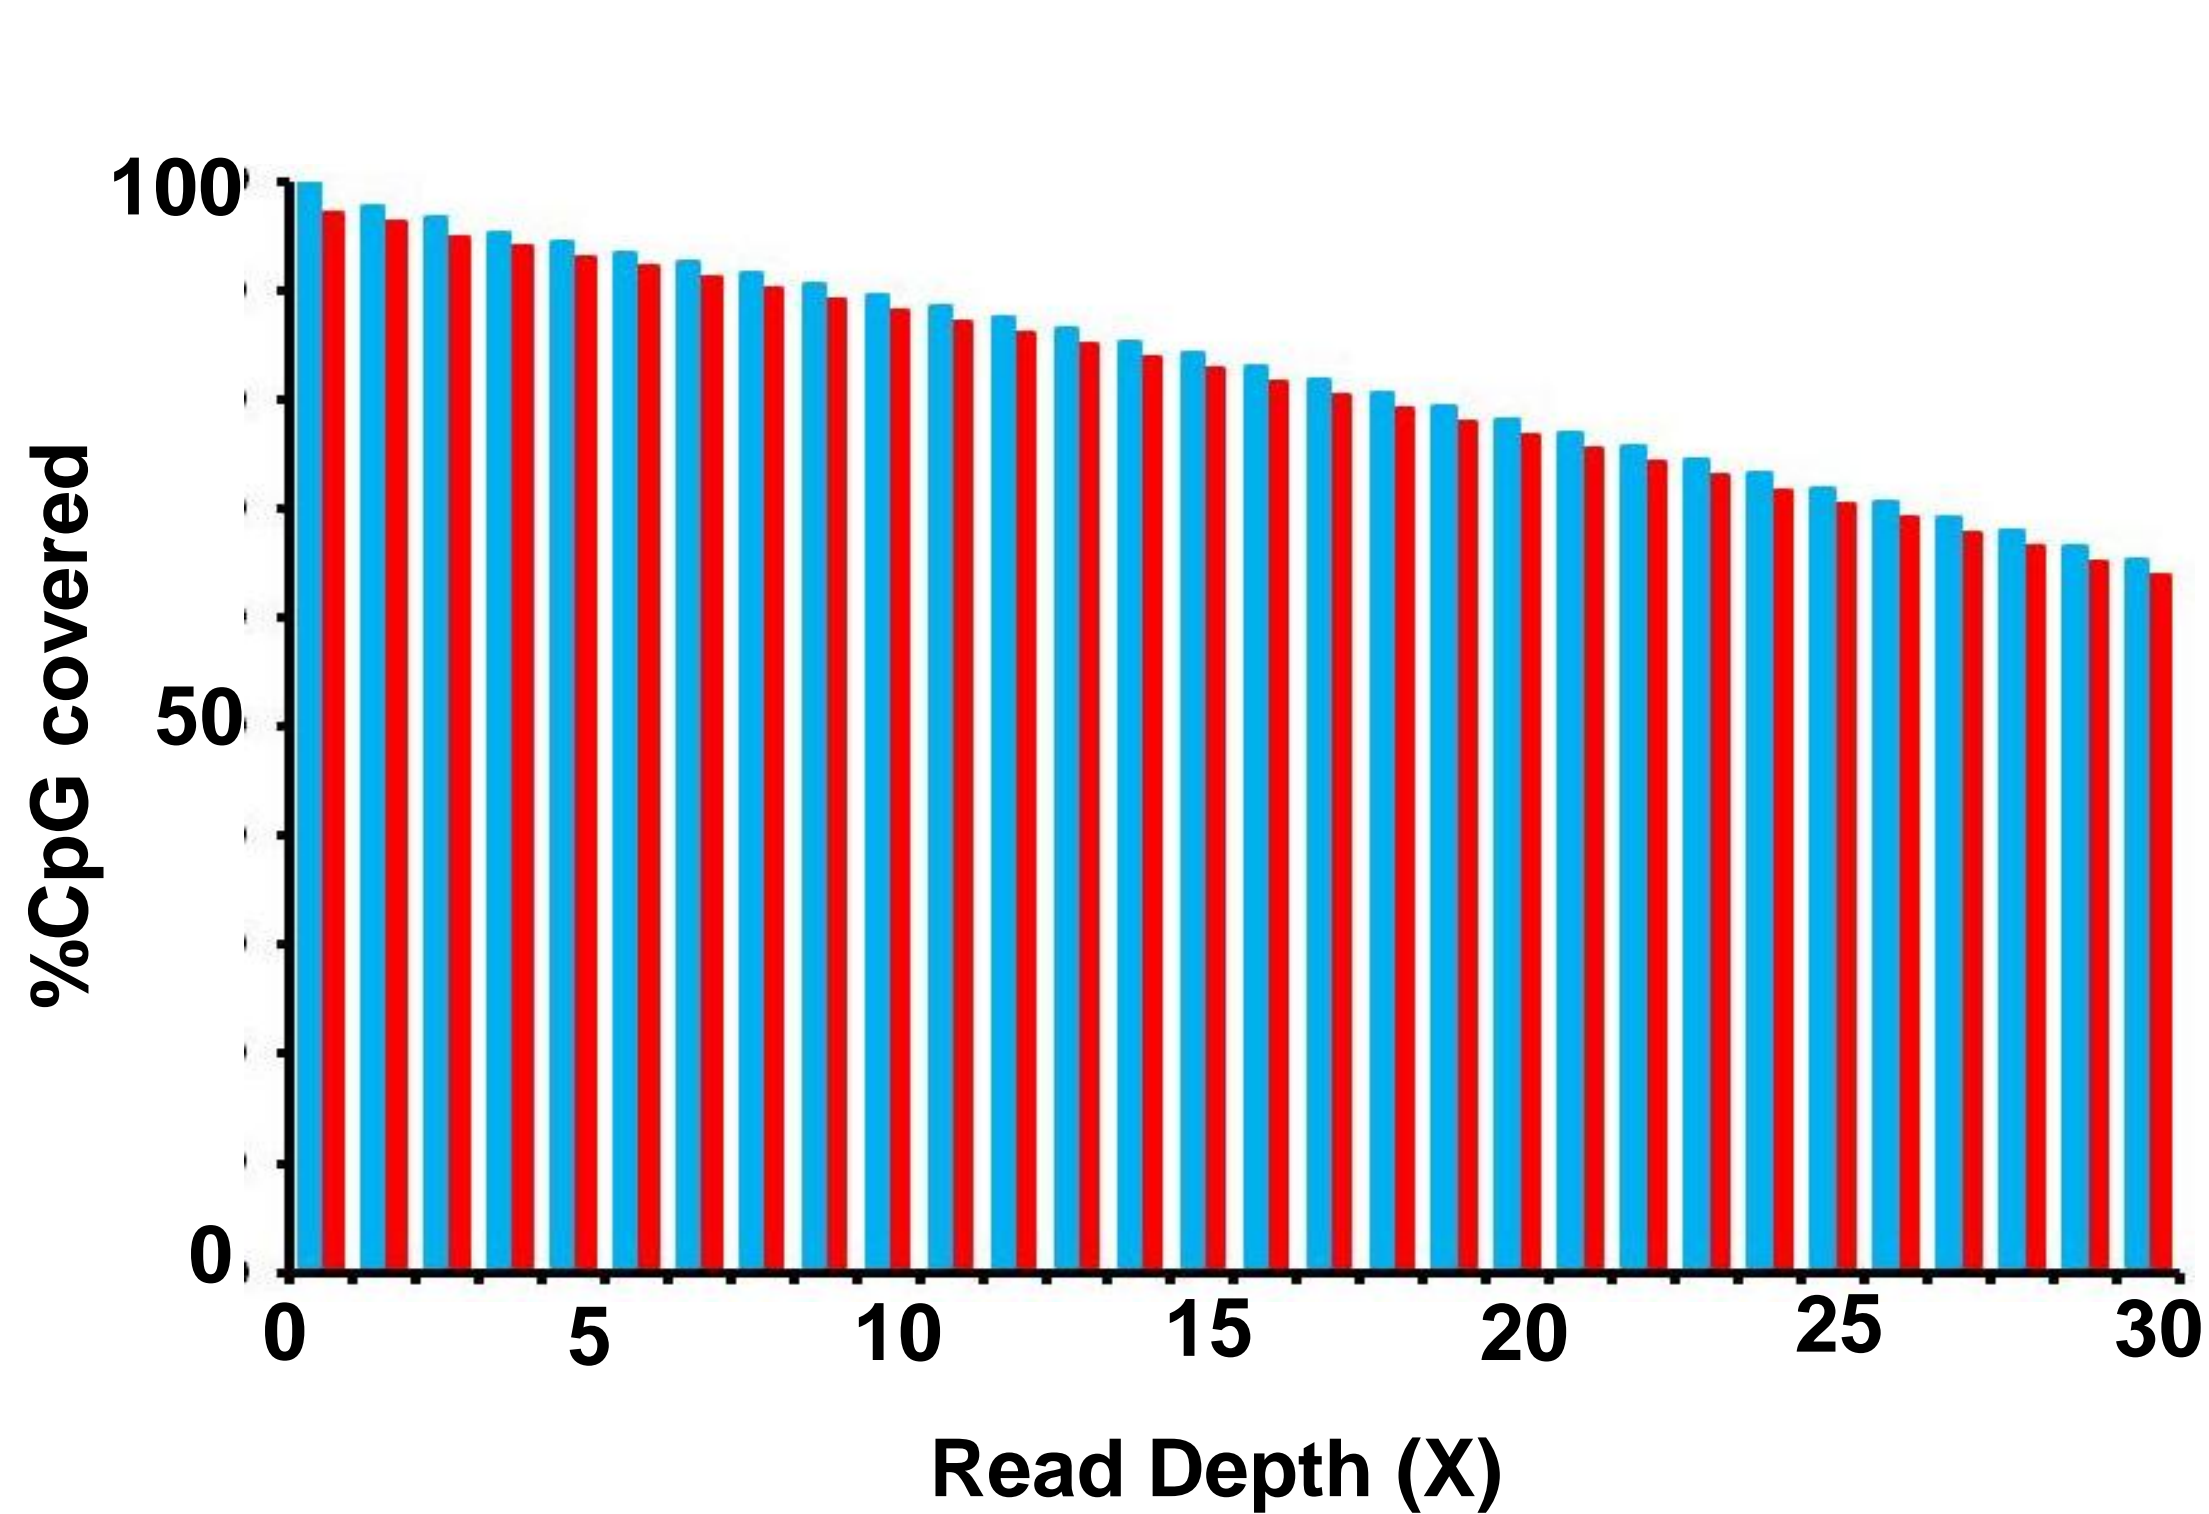

Supplementary Figure 11:

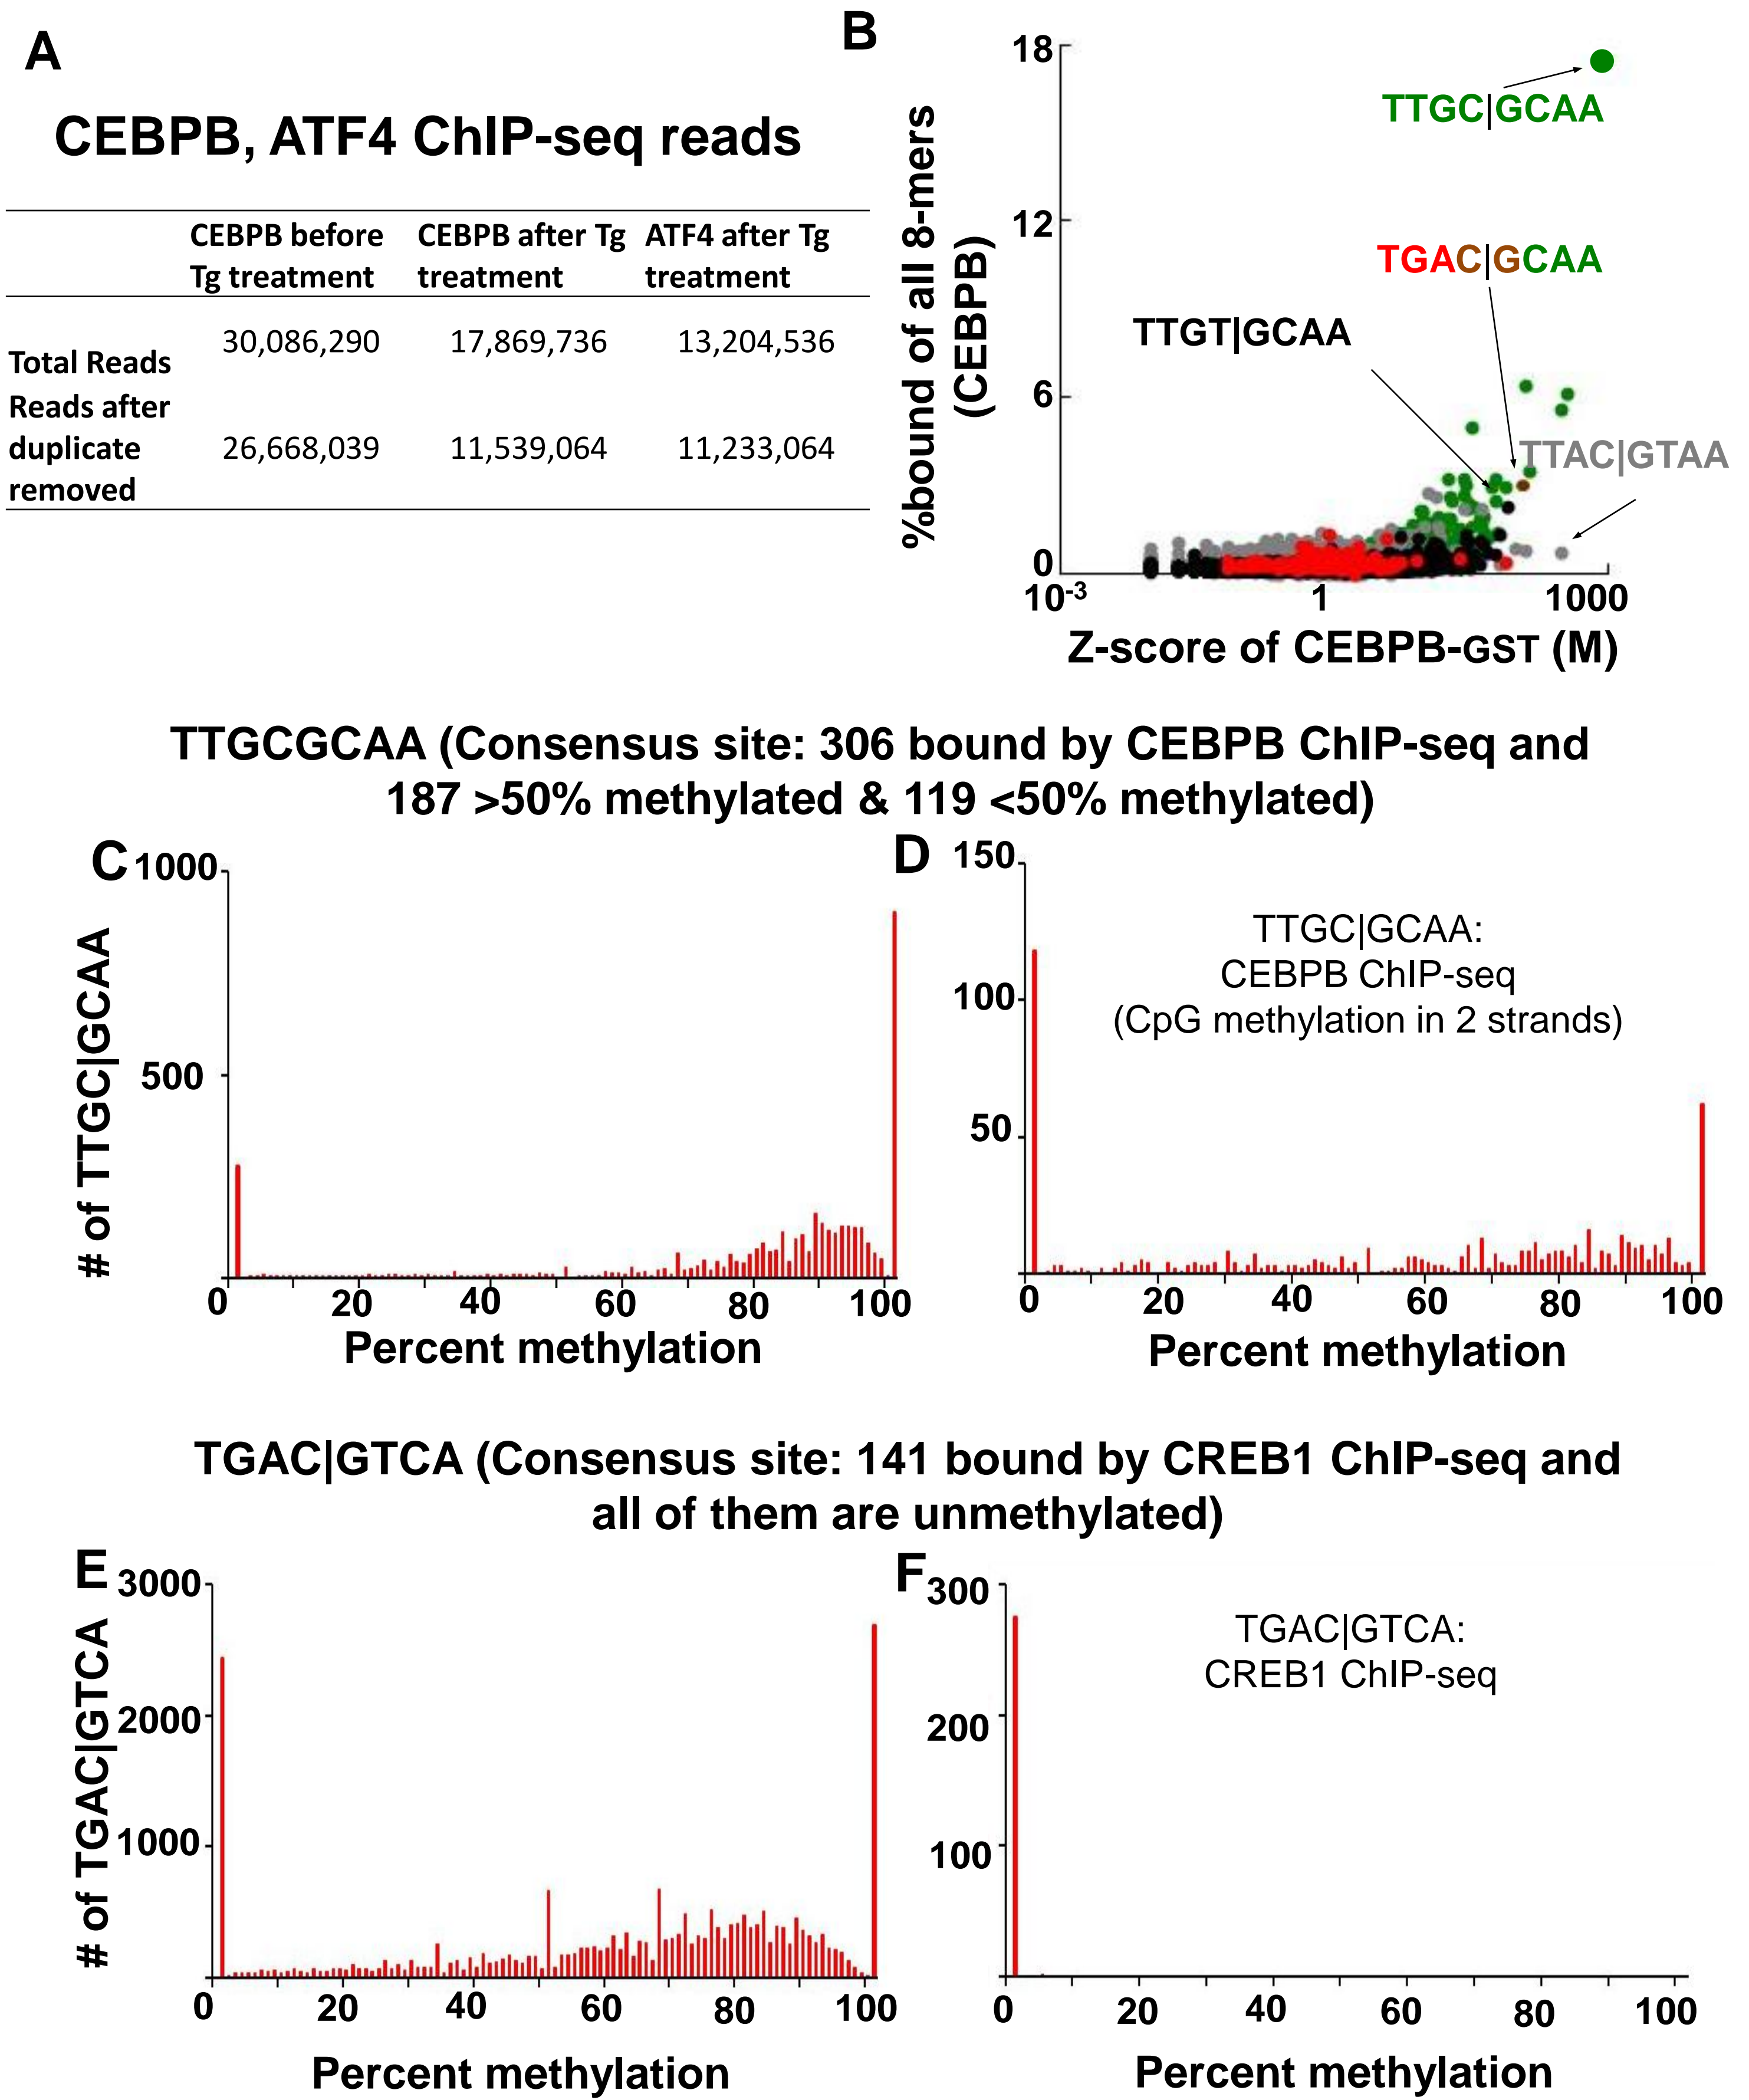

Supplementary Figure 12:

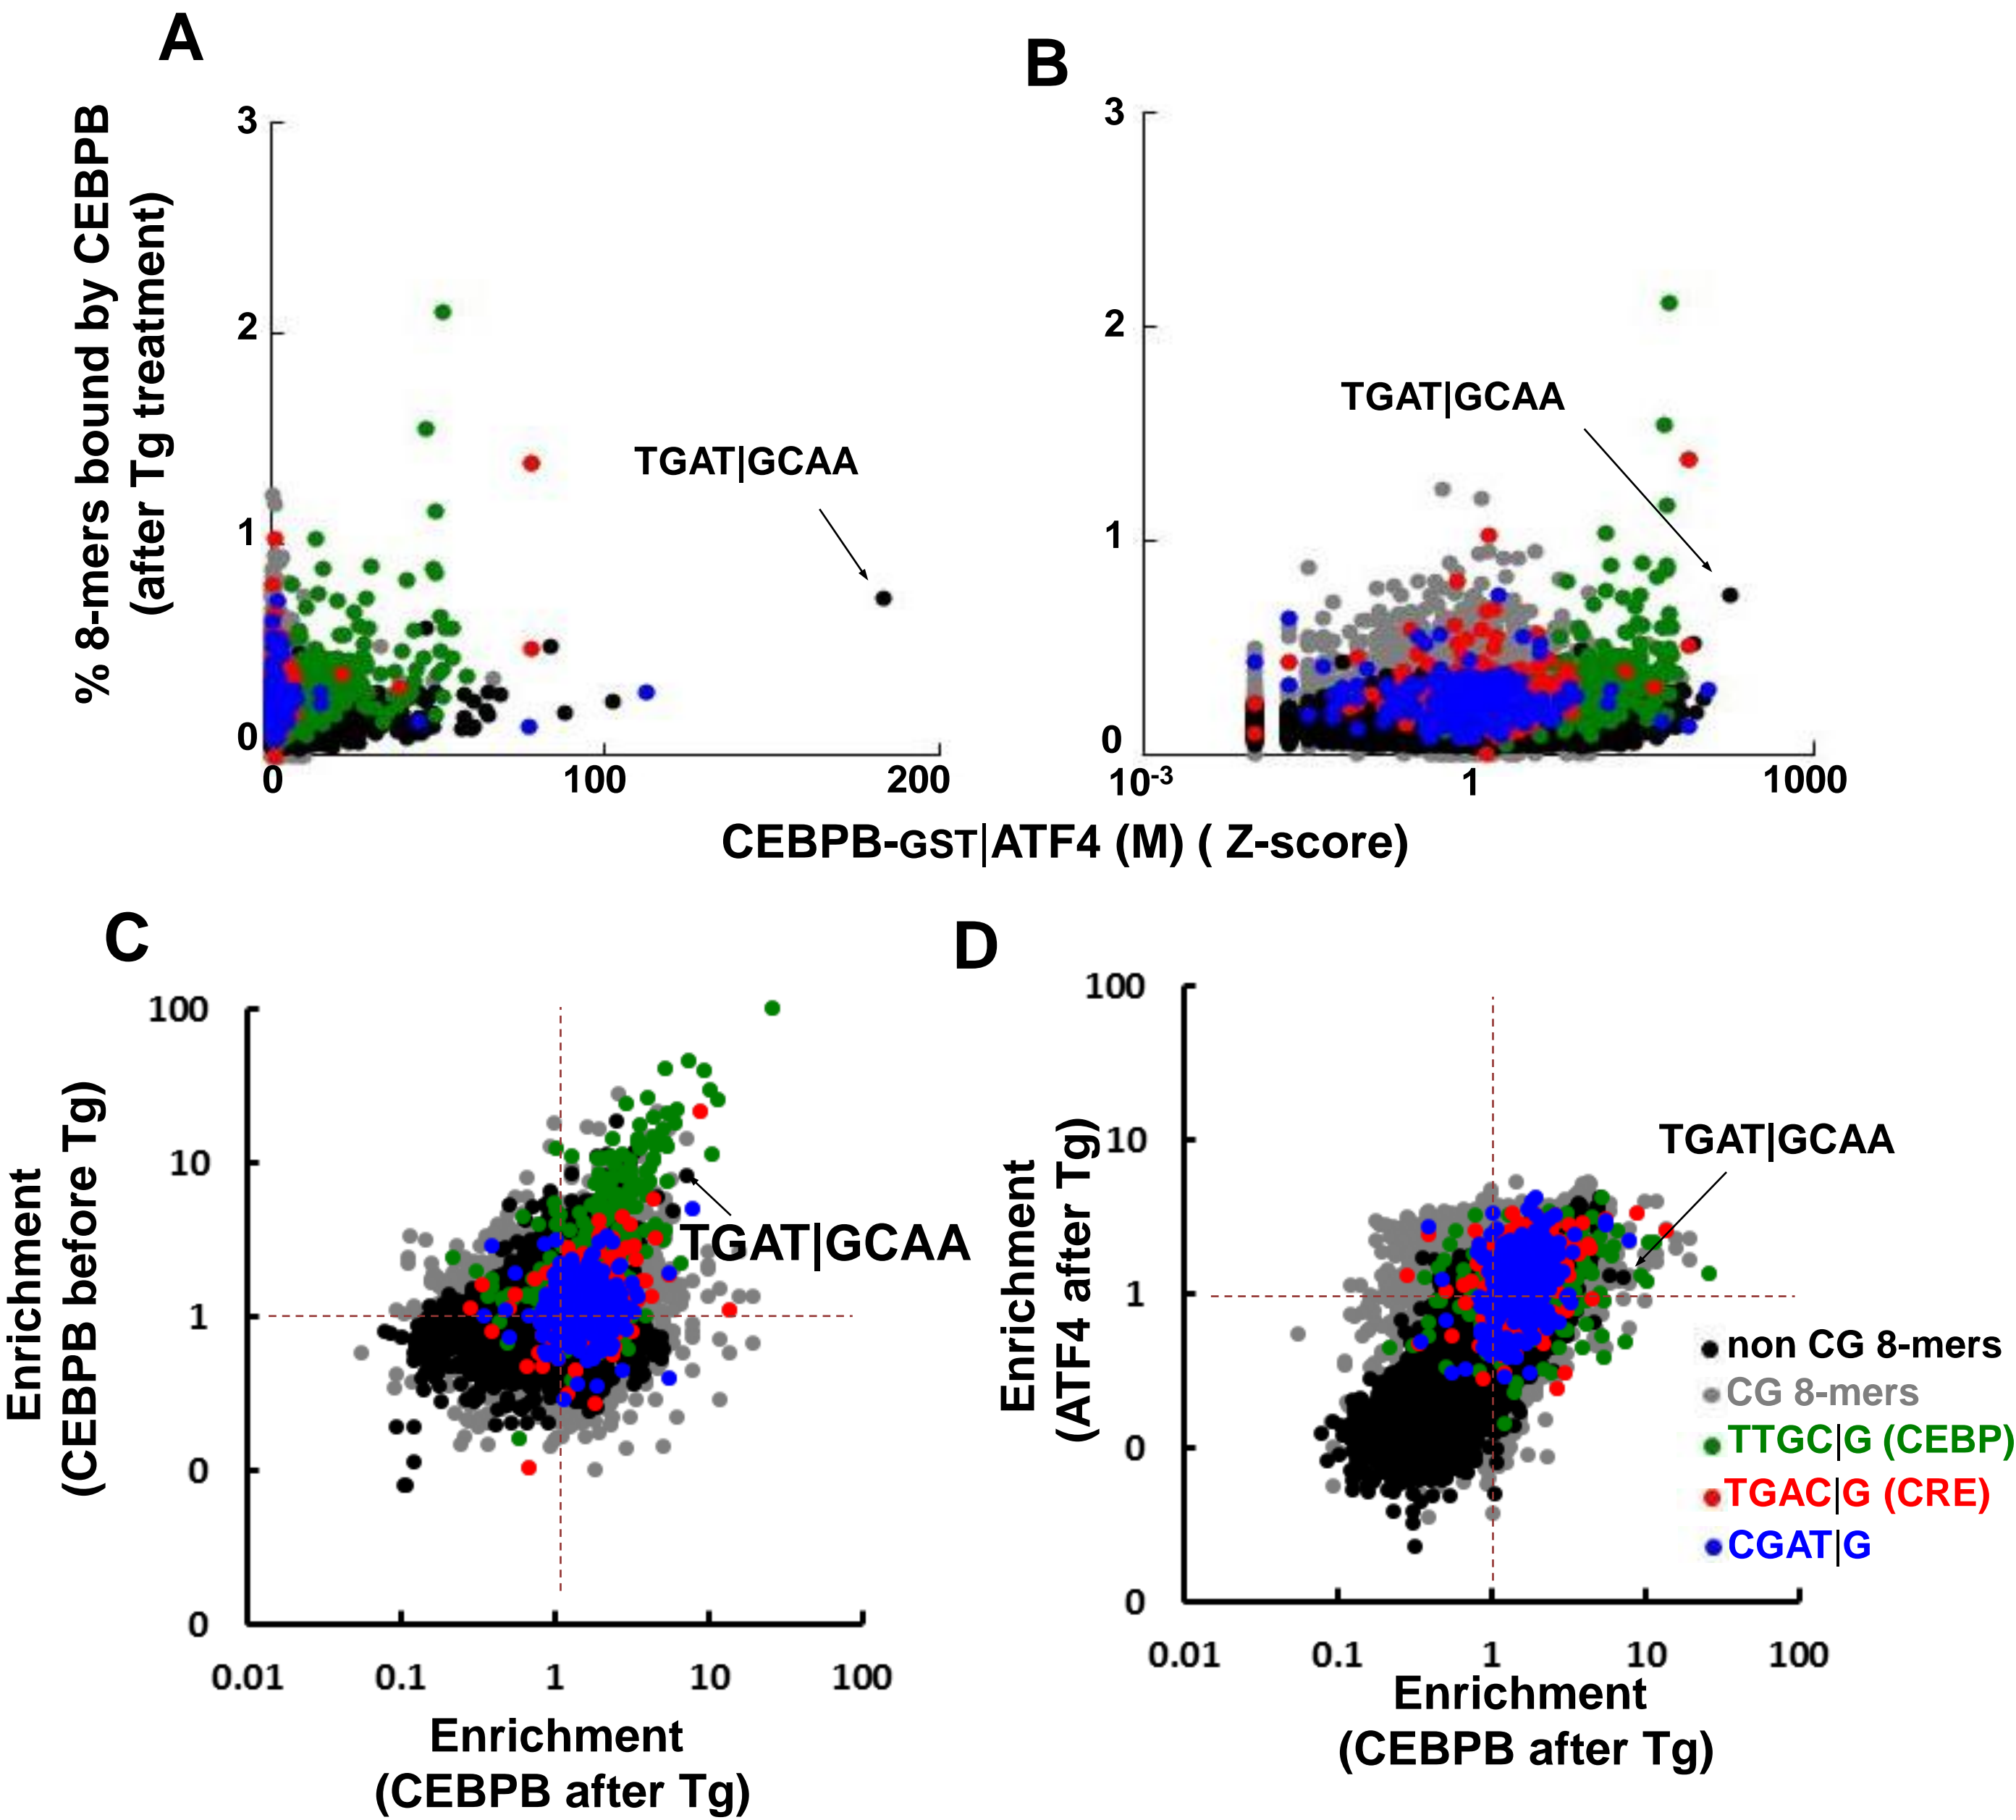



Supplementary Figure 13:

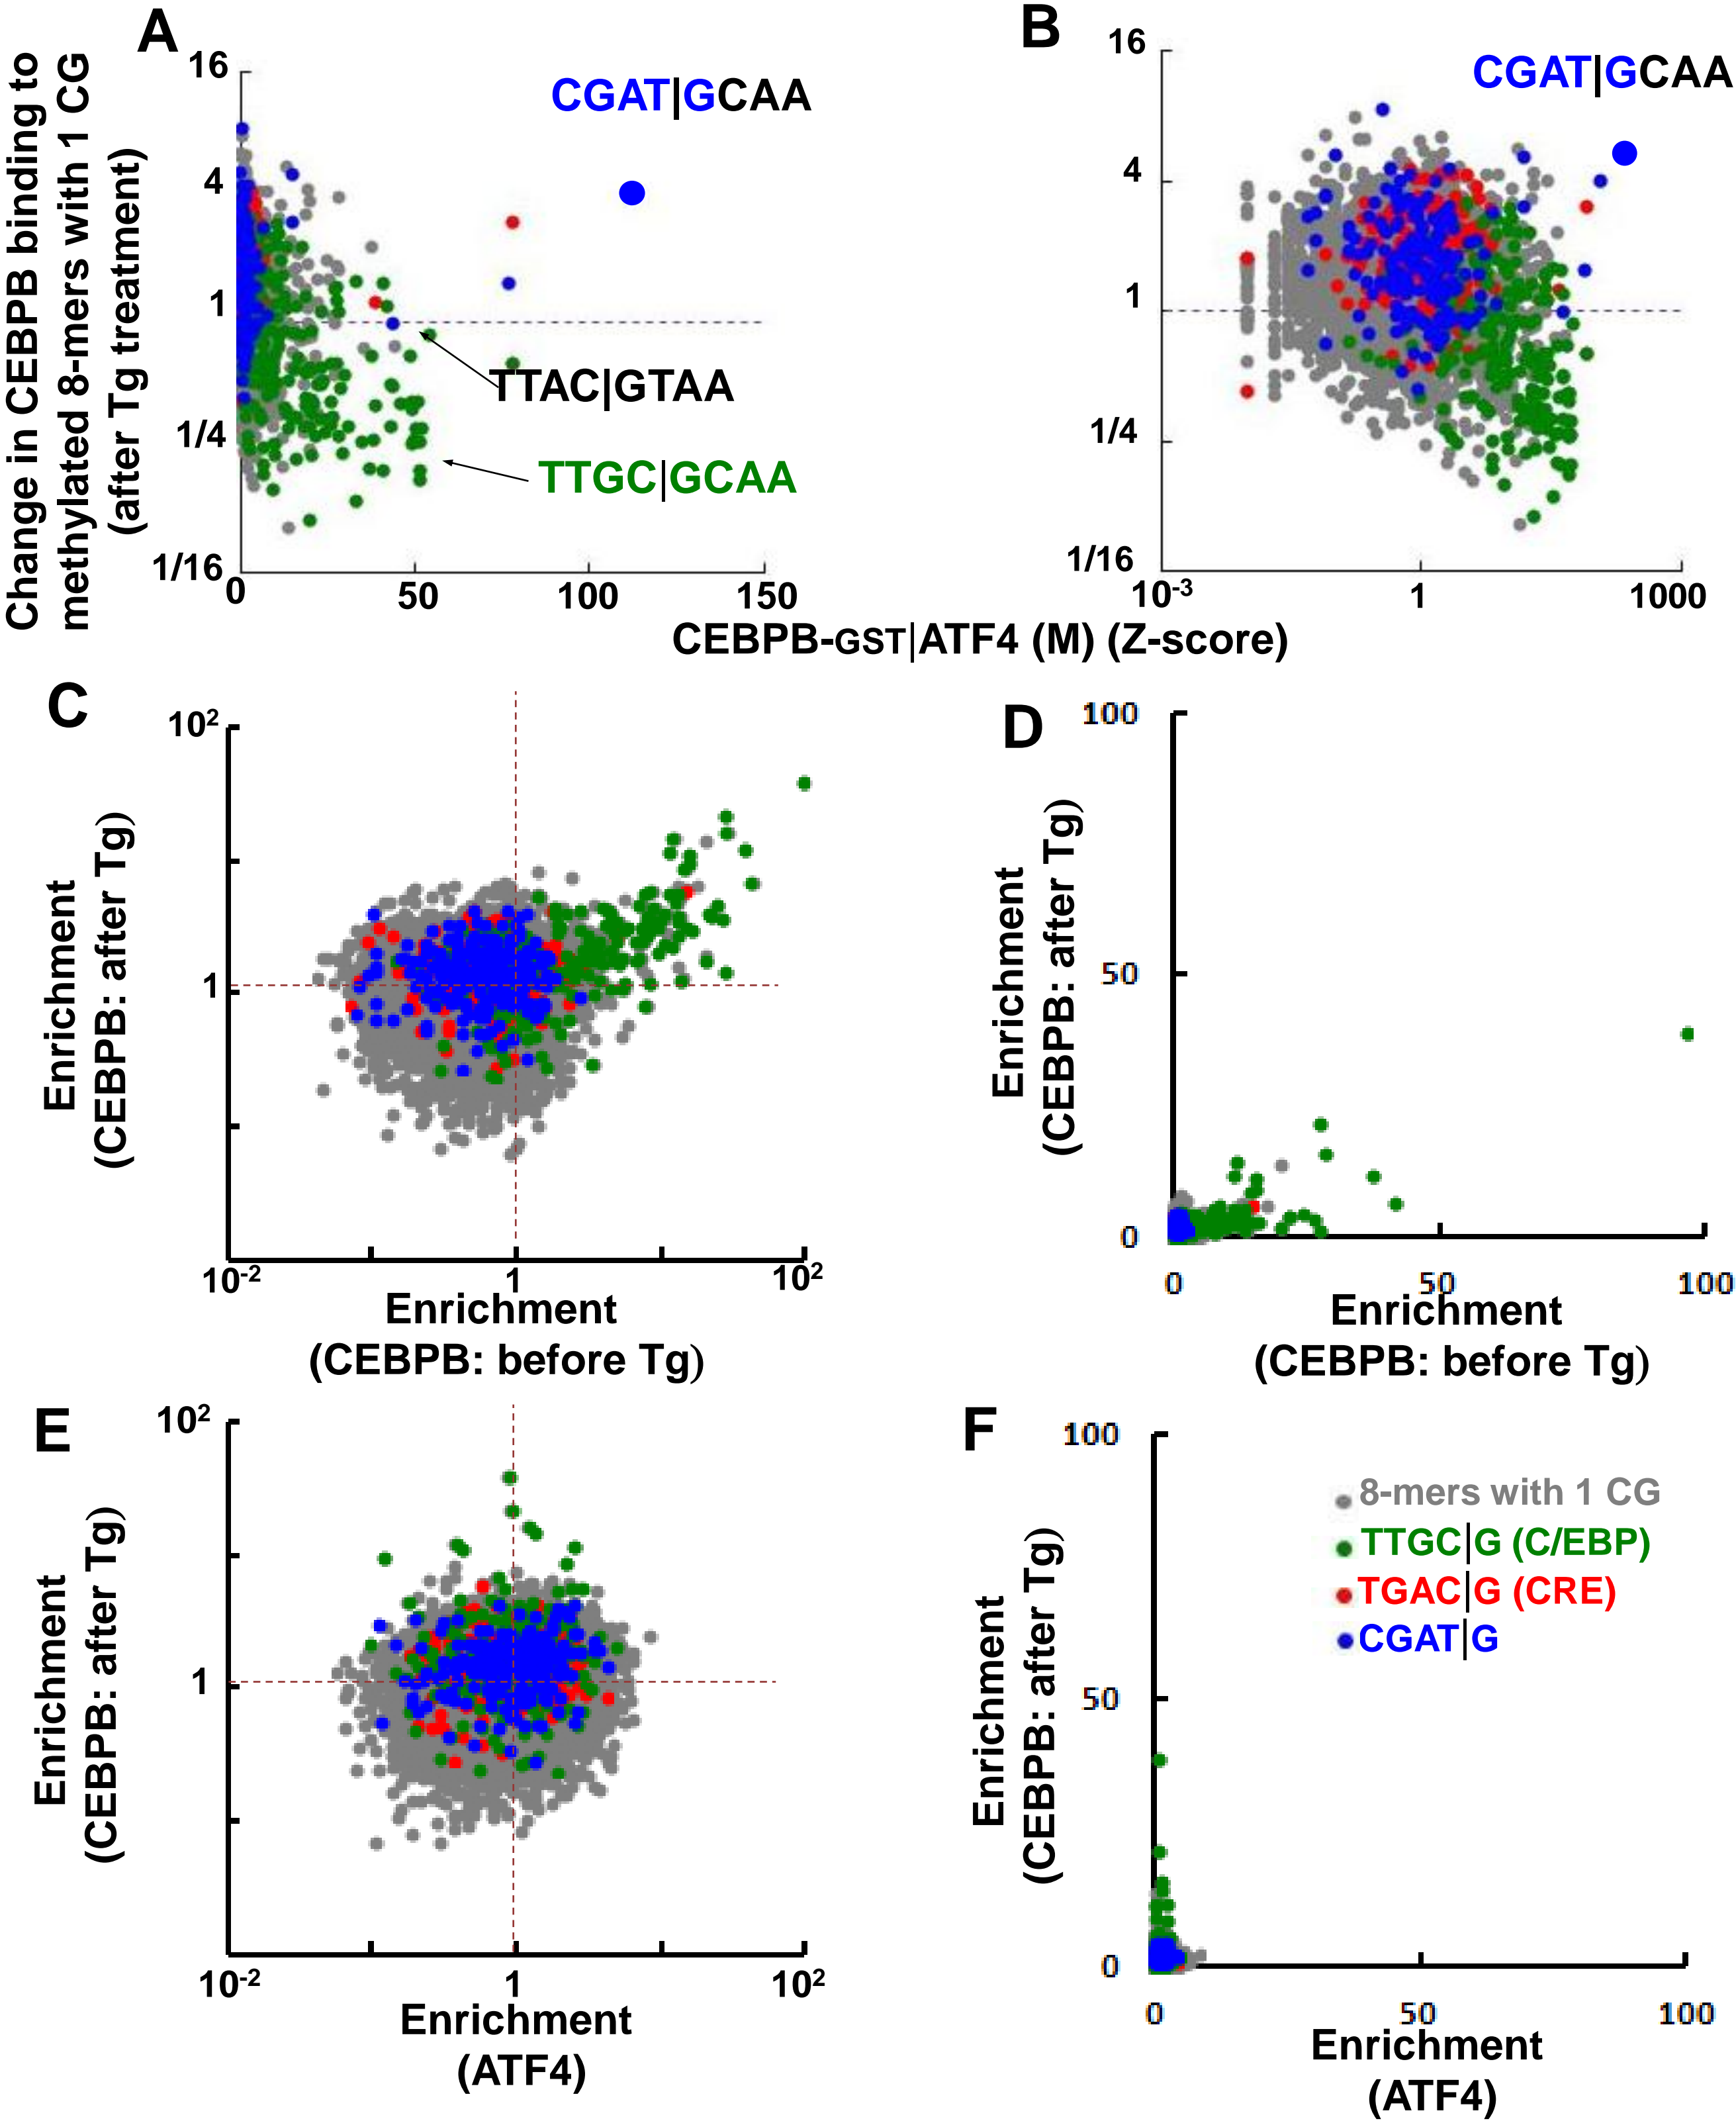

Supplementary Table1A. Estimation of length of CEBP motif (40K array)

|             | CEBPB |     | CEBPA |    | CEBPG |    | CEBPD |    |
|-------------|-------|-----|-------|----|-------|----|-------|----|
|             | UM*   | M‡  | UM    | M  | UM    | M  | UM    | M  |
| TGC   GCAAT | 70    | 129 | 42    | 84 | 51    | 69 | 26    | 39 |
| TGC   GCAAG | 13    | 28  | 12    | 16 | 8     | 15 | 7     | 5  |
| TGC   GCAAC | 20    | 33  | 14    | 24 | 16    | 27 | 9     | 10 |
| TGC   GCAA  | 5     | 14  | 3     | 6  | 3     | 6  | 2     | 4  |

Supplementary Table1B. Estimation of length of CEBP motif (180K array)

|             | CEBPB |      | CEBPA |     |
|-------------|-------|------|-------|-----|
|             | UM*   | M‡   | UM    | M   |
| TGC   GCAAT | 21.0  | 25.7 | 4.4   | 6.0 |
| TGC   GCAAG | 14.3  | 10.2 | 2.7   | 4.5 |
| TGC   GCAAC | 14.9  | 21.2 | 4.9   | 5.9 |
| TGC   GCAA  | 4.7   | 7.8  | 1.3   | 1.8 |

Supplementary Table1C. Estimation of length of TRE and CRE motifs (40K array)

|             | JUN |    | JUND |    | ATF4 |    | CREB1 |    |
|-------------|-----|----|------|----|------|----|-------|----|
|             | UM* | M‡ | UM   | M  | UM   | M  | UM    | M  |
| TGAG TCAT   | 12  | 11 | 28   | 30 | 1    | 1  | 1     | 8  |
| TGAG TCAG   | 4   | 3  | 9    | 5  | 1    | 0  | 0     | 2  |
| TGAG TCAC   | 9   | 9  | 17   | 21 | 1    | 1  | 2     | 9  |
| TGAG TCAA   | 2   | 1  | 3    | 3  | 0    | 0  | -1    | 1  |
| TGAC TCAT   | 13  | 15 | 27   | 24 | 1    | 1  | 1     | 7  |
| TGAC TCAG   | 2   | 5  | 8    | 7  | 0    | -1 | -1    | 1  |
| TGAC TCAC   | 7   | 4  | 15   | 15 | 1    | 1  | 1     | 6  |
| TGAC TCAA   | 2   | 3  | 5    | 4  | 1    | 0  | 1     | 4  |
| GAC   GTCAT | 4   | 0  | 6    | 2  | 3    | 0  | 33    | 20 |
| GAC   GTCAG | 1   | 1  | 1    | 2  | 3    | 2  | 33    | 15 |
| GAC   GTCAC | 2   | 2  | 3    | 2  | 2    | 1  | 32    | 26 |
| GAC   GTCAA | 1   | 0  | 2    | 2  | 0    | 1  | 13    | 7  |

\*UM, Unmethylated; ‡ M, methylated

| Supplementary Table1D. P-values for 8-mers (40K and 180K arrays) |                   |                         |                        |                                 |                          |                   |                        |                   |                                |                                                             |
|------------------------------------------------------------------|-------------------|-------------------------|------------------------|---------------------------------|--------------------------|-------------------|------------------------|-------------------|--------------------------------|-------------------------------------------------------------|
| Fig                                                              | 8mer <sup>2</sup> | Score type <sup>3</sup> | Score_Met <sup>4</sup> | Score_Met_Adjusted <sup>5</sup> | Score_UnMet <sup>6</sup> | Diff <sup>7</sup> | Direction <sup>8</sup> | Pval <sup>9</sup> | TF(s) <sup>10</sup>            | "DNA binding following CG methylation was..." <sup>11</sup> |
| 1C                                                               | TTGCGCAA          | Zscores                 | 1286.52                | 592.83                          | 506.63                   | 86.20             | Met_Hi                 | 3.23E-02          | CEBPA                          | enhanced                                                    |
| 1D                                                               | TTGCGCAA          | Zscores                 | 953.23                 | 599.01                          | 583.88                   | 15.13             | Met_Hi                 | 1.83E-02          | CEBPB                          | enhanced                                                    |
| 1E                                                               | TTGCGCAA          | Zscores                 | 253.27                 | 272.06                          | 290.84                   | -18.78            | UnMet_Hi               | 2.20E-03          | CEBPD                          | inhibited                                                   |
| 1F                                                               | TGACGTCA          | Zscores                 | 54.60                  | 38.35                           | 187.10                   | -148.75           | UnMet_Hi               | 2.11E-28          | CREB1                          | inhibited                                                   |
| 1G                                                               | TGACGTCA          | Zscores                 | 2.47                   | 1.61                            | 13.86                    | -12.25            | UnMet_Hi               | 1.02E-76          | ATF4                           | inhibited                                                   |
| 1H                                                               | CGATGCAA          | Zscores                 | 112.03                 | 113.10                          | 22.92                    | 90.17             | Met_Hi                 | 1.35E-88          | CEBPB                          | enhanced                                                    |
| 1H                                                               | TGACGCAA          | Zscores                 | 77.95                  | 78.69                           | 160.58                   | -81.89            | UnMet_Hi               | 5.35E-96          | -GST ATF4                      | inhibited                                                   |
| S2A                                                              | TGACGTCA          | Zscores                 | 2.87                   | 2.05                            | 23.75                    | -21.71            | UnMet_Hi               | 8.72E-84          | JUN                            | inhibited                                                   |
| S2B                                                              | TGACGTCA          | Zscores                 | 4.05                   | 2.86                            | 30.52                    | -27.66            | UnMet_Hi               | 7.07E-81          | JUND                           | inhibited                                                   |
| S2C                                                              | TTGCGCAA          | Zscores                 | 224.86                 | 241.65                          | 273.65                   | -31.99            | UnMet_Hi               | 1.19E-03          | CEBPG                          | inhibited                                                   |
| 3C*                                                              | CTGACGCA          | Medians                 | 12513.67               | 7777.64                         | 10012.00                 | -2234.36          | Homo_Hi*               | 4.68E-03          | CEBPB                          | inhibited (hetero)*                                         |
| 3D*                                                              | CCGATGCA          | Medians                 | 12048.00               | 7796.14                         | 1295.33                  | 6500.81           | Hetero_Hi*             | 5.01E-03          | -GST ATF4 vs C/EBPb-GST (Met)* | enhanced (hetero)*                                          |
| 3D*                                                              | ATGACGCA          | Medians                 | 9376.50                | 6083.14                         | 21990.50                 | -15907.36         | Homo_Hi*               | 6.26E-29          | CEBPB                          | inhibited (hetero)*                                         |
| 3E                                                               | CCGATGCA          | Medians                 | 12048.00               | 12073.81                        | 3864.50                  | 8209.31           | Met_Hi                 | 3.97E-26          | -GST ATF4                      | enhanced                                                    |
| 3E                                                               | ATGACGCA          | Medians                 | 9376.50                | 9394.46                         | 9965.33                  | -570.87           | UnMet_Hi               | 1.78E-02          | CEBPB                          | inhibited                                                   |
| S5A                                                              | CGATGCAA          | Zscores                 | 22.29                  | 13.42                           | 2.96                     | 10.46             | Met_Hi                 | 1.66E-08          | ATF4-                          | enhanced                                                    |
| S5A                                                              | TGACGCAA          | Zscores                 | 3.56                   | 2.15                            | 33.99                    | -31.84            | UnMet_Hi               | 3.62E-97          | GST CEBPB                      | inhibited                                                   |
| S8A                                                              | ACGATGCA          | Medians                 | 6603.83                | 5687.49                         | 650.00                   | 5037.49           | Met_Hi                 | 4.69E-11          | ATF4-                          | enhanced                                                    |
| S8A                                                              | CTGACGCA          | Medians                 | 1363.50                | 1104.14                         | 5447.00                  | -4342.86          | UnMet_Hi               | 2.93E-15          | GST CEBPB                      | inhibited                                                   |

1

Figure in which the comparison is illustrated.

2

8mer being compared.

3

Type of 8mer score being compared. For 16x arrays, Zscores are used. For 4x arrays, the median signal intensity is used.

4

Raw score on the methylated array.

5

Adjusted score on the methylated array - the score resulting from a linear regression of the methylated scores onto the unmethylated scores (see Methods).

6

Raw score on the unmethylated array.

7

Difference between the adjusted methylated score and the unmethylated score.

8

Direction of the difference (e.g., "Met\_Hi" means the 8mer scored higher on the methylated array).

9

P-value of the difference (based on a Z-score transformation comparing to the expected mean and standard deviation of top-scoring 8mers on replicate unmethylated arrays - see Methods)

10

TF(s) tested on the array.

11

"Final verdict", based on the p-value.

\*comparison here is between a hetero and homo-dimeric complexes, instead of methylated vs unmethylated arrays

**Supplementary Table2: Z-score from 40K array for homodimers (CEBPB and ATF4) and heterodimers (CEBPB-GST|ATF4 and CEBPB|ATF4-GST) for canonical C/EBP, CRE, chimera and CGAT|G site**

|           |             | CEBPB-GST |     | ATF4-GST |    | CEBPB-GST ATF4 |     | ATF4-GST CEBPB |    |
|-----------|-------------|-----------|-----|----------|----|----------------|-----|----------------|----|
|           |             | UM*       | M‡  | UM       | M  | UM             | M   | UM             | M  |
| C/EBP     | TTGC   GCAA | 584       | 953 | 3        | 2  | 69             | 52  | 1              | 2  |
| CRE       | TGAC   GTCA | 7         | 8   | 14       | 2  | 34             | 21  | 15             | 3  |
| CGATG     | CGAT   GCAA | 4         | 4   | 1        | 0  | 23             | 112 | 3              | 22 |
| Chimera   | TGAC   GCAA | 86        | 119 | 3        | 3  | 161            | 78  | 34             | 4  |
| Chimera-1 | TGAT   GCAA | 47        | 45  | 1        | 2  | 178            | 183 | 39             | 26 |
| worst     | NNNNNNNN    | -4        | -3  | -4       | -3 | -3             | -3  | -4             | -3 |

\*UM, Unmethylated; ‡ M, methylated



Supplementary Table 3A: Ratio of fluorescence intensities for the best versus the worst bound 8-mers from 180K array

|                          | CEBPA-GST |    | CEBPB-GST |     | ATF4-GST |    | CEBPB-GST ATF4 |       | ATF4-GST CEBPB |      |
|--------------------------|-----------|----|-----------|-----|----------|----|----------------|-------|----------------|------|
|                          | UM*       | M‡ | UM*       | M‡  | UM       | M  | UM             | M     | UM             | M    |
| Ratio:<br>best/<br>worst | 45        | 44 | 267       | 191 | 22       | 16 | 181.4          | 156.1 | 126.2          | 71.8 |

Supplementary Table 3B: Fluorescence intensities (×1,000) from 180K array for homodimers (CEBPB and ATF4) and heterodimers (CEBPB-GST|ATF4 and CEBPB|ATF4-GST) for canonical CEBP, CRE, chimera and CGATG site

|           |                             | CEBPB-GST |      | ATF4-GST |     | CEBPB-GST ATF4 |      | ATF4-GST CEBPB |      |
|-----------|-----------------------------|-----------|------|----------|-----|----------------|------|----------------|------|
|           |                             | UM*       | M‡   | UM       | M   | UM             | M    | UM             | M    |
| C/EBP     | A <b>TTGC</b>   <b>GCAA</b> | 22.8      | 30.6 | 1.5      | 2.2 | 3.7            | 4.2  | 0.6            | 0.7  |
| CRE       | A <b>TGAC</b>   <b>GTCA</b> | 2.5       | 4.6  | 13.8     | 2.4 | 1.8            | 2.6  | 9.3            | 1.7  |
| CGATG     | C <b>CGAT</b>   <b>GCAA</b> | 0.8       | 1.3  | 1.3      | 1.9 | 3.9            | 12   | 1.1            | 11   |
| Chimera   | C <b>TGAC</b>   <b>GCAA</b> | 10.0      | 13.2 | 1.8      | 1.8 | 12.5           | 8.2  | 12.9           | 3.4  |
| Chimera-1 | C <b>TGAT</b>   <b>GCAA</b> | 8.4       | 8.9  | 1.9      | 2.1 | 15.8           | 13.8 | 13.1           | 14.6 |
| worst     | <b>NNNNNNNN</b> A           | 0.1       | 0.2  | 0.6      | 0.6 | 0.1            | 0.1  | 0.1            | 0.2  |

Supplementary Table 3C: Methylated 8-mer NCGAT|GCAA bound well by CEBPB|ATF4 heterodimer: fluorescence intensity (X1000) from 180K array

|                             | CEBPB-GST |     | ATF4-GST |     | CEBPB-GST ATF4 |      | ATF4-GST CEBPB |      |
|-----------------------------|-----------|-----|----------|-----|----------------|------|----------------|------|
|                             | UM*       | M‡  | UM       | M   | UM             | M    | UM             | M    |
| C <b>CGAT</b>   <b>GCAA</b> | 0.8       | 1.3 | 1.3      | 1.9 | 3.9            | 12   | 1.1            | 11   |
| A <b>CGAT</b>   <b>GCAA</b> | 0.9       | 1.9 | 1.3      | 1.8 | 3              | 11.6 | 1.3            | 13.1 |
| G <b>CGAT</b>   <b>GCAA</b> | 0.8       | 1.8 | 1.6      | 2.4 | 3.3            | 10.6 | 1.2            | 10.4 |
| T <b>CGAT</b>   <b>GCAA</b> | 0.7       | 1   | 1.8      | 1.7 | 2.2            | 5.9  | 1.4            | 4.6  |

\*UM, Unmethylated; ‡ M, methylated

Supplementary Table 4A. Genome wide cytosine methylation of mouse primary dermal fibroblasts

|     | CT strand   |                         |                        | GA strand   |                         |                        |
|-----|-------------|-------------------------|------------------------|-------------|-------------------------|------------------------|
|     | Total       | Unmethylated            | Methylated             | Total       | Unmethylated            | Methylated             |
| CpG | 20,198,742  | 5,120,127<br>(25.35%)   | 15,078,615<br>(74.65%) | 20,200,725  | 5,119,883<br>(25.35%)   | 15,080,842<br>(74.65%) |
| CHG | 104,729,135 | 104,668,326<br>(99.94%) | 60,809<br>(0.06%)      | 104,720,502 | 104,662,171<br>(99.94%) | 58,331<br>(0.06%)      |
| CHH | 353,973,395 | 353,791,950<br>(99.95%) | 181,445<br>(0.05%)     | 354,056,680 | 353,876,705<br>(99.95%) | 179,975<br>(0.05%)     |

Supplementary Table4B. Genome-wide methylation and CEBPB binding for certain sequences

| ATF4 |        | Motifs      | # Motifs in Genome | # with methylation coverage | Unmethylated motifs | Methylated motifs  | Bound by CEBPB |
|------|--------|-------------|--------------------|-----------------------------|---------------------|--------------------|----------------|
|      |        |             |                    |                             | (% bound by CEBPB)  | (% bound by CEBPB) | (% Methylated) |
| −    | 10-mer | ATTGC GCAAT | 119                | 115                         | 12 (83%)            | 103 (35%)          | 45 (80%)       |
|      | 8-mer  | TTGC GCAA   | 2,119              | 1,999                       | 220 (54%)           | 1,779 (11%)        | 306 (61%)      |
|      | 8-mer  | TTGT GCAA   | 81,910             | -                           | 81,910 (1.7%)       |                    | 1,413          |
|      | 7-mer  | CGAT GCA*   | 29,611             | 28,384                      | 4,323 (1.0%)        | 24,061 (0.1%)      | 59 (24%)       |
|      | 8-mer  | TGAT GCAA*  | 48148              | -                           | 48,148 (0.7%)       | -                  | 351            |
| +    | 10-mer | ATTGC GCAAT | 119                | 115                         | 12 (0.0%)           | 103 (9.7%)         | 10 (100%)      |
|      | 8-mer  | TTGC GCAA   | 2,119              | 1,999                       | 220 (1.4%)          | 1,779 (2.3%)       | 44 (93%)       |
|      | 8-mer  | TTGT GCAA   | 81,910             | --                          | 81,910 (0.2%)       | --                 | 136            |
|      | 7-mer  | CGAT GCA*   | 29,611             | 28,384                      | 4,323 (0.4%)        | 24,061 (0.1%)      | 46 (61%)       |
|      | 8-mer  | TGAT GCAA*  | 48,148             | --                          | 48,148 (0.5%)       | --                 | 264            |

Supplementary Table 4C. CREB1 binding to unmethylated and methylated CRE 8-mers (TGAC|GTCA) in mouse primary dermal fibroblasts

| TGAC GTCA       | Unmethylated | Methylated | Total  |
|-----------------|--------------|------------|--------|
| CREB1 Bound     | 141          | 0          | 141    |
| CREB1 not Bound | 4,691        | 9,465      | 14,156 |
| Total           | 4,832        | 9,465      | 14,297 |

Supplementary Table 5A. *In vivo* and *in vitro* CEBPB binding to unmethylated and methylated C/EBP like 9-mers

| 9-mers     | # 9-mers<br>in Genome | # 9-mers<br>with<br>methylation<br>coverage | Unmethylated 9-mers             |       |                |       | Methylated 9-mers               |       |             |       |
|------------|-----------------------|---------------------------------------------|---------------------------------|-------|----------------|-------|---------------------------------|-------|-------------|-------|
|            |                       |                                             | In vitro<br>(x10 <sup>3</sup> ) | Ratio | # (%<br>bound) | Ratio | In vitro<br>(x10 <sup>3</sup> ) | Ratio | # (% bound) | Ratio |
| TTGC GCAAT | 479                   | 446                                         | 21                              | 1     | 46 (74%)       | 1     | 25                              | 1     | 400 (17.5%) | 1     |
| TTGC GCAAC | 370                   | 354                                         | 14.9                            | 0.71  | 52 (63%)       | 0.85  | 21.2                            | 0.85  | 302 (17.8%) | 1.02  |
| TTGC GCAAG | 597                   | 574                                         | 14.3                            | 0.68  | 64 (47%)       | 0.64  | 10.2                            | 0.41  | 510 (8.6%)  | 0.49  |
| TTGC GCAAA | 674                   | 625                                         | 4.7                             | 0.22  | 51 (41%)       | 0.55  | 7.8                             | 0.31  | 574 (3.5%)  | 0.20  |

Supplementary Table 5B. CEBPB binding to unmethylated and methylated C/EBP like 10-mers in mouse primary dermal fibroblasts

| Motifs      | # in<br>Genome | # in Peak | %bound | Masked Genome  |                                   |                                 |                                  |
|-------------|----------------|-----------|--------|----------------|-----------------------------------|---------------------------------|----------------------------------|
|             |                |           |        | # in<br>Genome | # with<br>methylation<br>coverage | Unmethylated<br>(CEBPB binding) | Methylated<br>(CEBPB<br>binding) |
| ATTGC GCAAT | 119            | 45        | 38%    | 101            | 98                                | 11(82%)                         | 87(39%)                          |
| ATTGC GCAAC | 170            | 55        | 32%    | 127            | 125                               | 17(82%)                         | 108(28%)                         |
| GTTGC GCAAC | 76             | 27        | 36%    | 46             | 45                                | 12(75%)                         | 33(27%)                          |
| ATTGC GCAAG | 255            | 46        | 18%    | 164            | 163                               | 30(63%)                         | 133(17%)                         |
| CTTGC GCAAC | 210            | 45        | 21%    | 141            | 138                               | 29(66%)                         | 109(16%)                         |
| CTTGC GCAAG | 205            | 25        | 12%    | 143            | 142                               | 24(46%)                         | 118(8%)                          |
| ATTGC GCAAA | 316            | 33        | 10%    | 244            | 236                               | 28(46%)                         | 208(8%)                          |
| GTTGC GCAAA | 221            | 17        | 8%     | 153            | 148                               | 22(36%)                         | 126(5%)                          |
| CTTGC GCAAA | 353            | 16        | 5%     | 268            | 262                               | 34(21%)                         | 228(3%)                          |
| TTTGC GCAAA | 195            | 4         | 2%     | 150            | 139                               | 15(7%)                          | 124(2%)                          |

**Supplementary Table 6A. Enriched GO Terms for CEBPB bound genes with TGAT|GCAA motifs after ATF4 induction by thapsigargin**

|           | Term       |                                             | Count | P-Value | Fold Enrichment |
|-----------|------------|---------------------------------------------|-------|---------|-----------------|
| TGAT GCAA | GO:0006418 | tRNA aminoacylation for protein translation | 3     | 0.01    | 19.26           |
|           | GO:0043039 | tRNA aminoacylation                         | 3     | 0.01    | 19.26           |
|           | GO:0043038 | amino acid activation                       | 3     | 0.01    | 19.26           |

**Supplementary Table 6B. P-values based on fraction of CEBP ChIP-seq peaks vs non peaks containing K-mers with mCGAT|G before and after ATF4 induction**

| Kmers      | P-value  |
|------------|----------|
| mCGAT GCAA | 1.05E-03 |
| mCGAT GCA  | 6.52E-06 |
| mCGAT GC   | 9.49E-17 |
| mCGAT GT   | 2.11E-06 |
| mCGAT G    | 2.46E-28 |

**Supplementary Table 6C. Enriched GO Terms for CEBPB bound genes with CGAT|G motifs after ATF4 induction by thapsigargin**

| CGAT G       | Term       |                                    | Count | P-Value | Fold Enrichment |
|--------------|------------|------------------------------------|-------|---------|-----------------|
| Unmethylated | GO:0006915 | apoptosis                          | 6     | 0.048   | 2.97            |
|              | GO:0006468 | protein amino acid phosphorylation | 8     | 0.002   | 4.36            |
| Methylated   | GO:0006793 | phosphorus metabolic process       | 9     | 0.002   | 3.62            |
|              | GO:0006605 | protein targeting                  | 3     | 0.053   | 7.86            |

Supplementary Table 7: B-ZIP domain sequences used in this study

| C-terminal GST tag       | basic region                                      | leucine zipper                                             |
|--------------------------|---------------------------------------------------|------------------------------------------------------------|
| ATF4                     | PYDPPGVSLTAKVKTEKLDKKLKKMEQNKTAAATRYRQKKRAEQEALTG | ECKELEKKNEALKEKADSLAKEIQYLKDLIEEVRKARGKKRVP                |
| CREB1                    | VVMASSPALPTQPAEEAARKREVRLMKNREAAARECRRKKKEYVKCLEN | RVAVLENQNKTLLIEELKALKDLYCHKSD                              |
| JUN                      | MPGETPPLSPIDMESQERIKAEKRMRNRIAASKCRKRLERIARLEE    | KVKTLKAQNSELASTANMLREQVAQLKQKVMNHVNSGCQLMLTQQQLQ           |
| JUND                     | SFGDSPPLSPIDMDTQERIKAEKRLLRNRIAAASKCRKRLERISRLEE  | KVKTLKSQNTTELASTASLLREQVAQLKQKVLSHVNSGCQLLPQHQP            |
| CEBPA                    | GSGAGAGKAKKSVDKNSNEYRVRRERNNIAVRKSRDKAKQRNVETQQ   | KVLELTSDNDRLLRKRVEQLSRELDTLRGIFRQLPESSWSRPWATA             |
| CEBPB                    | PPAAPAKAKAKKTVDKLSDEYKMRRENNIAVRKSRDKAKMRNLETQH   | KVLELTAENERLQKKVEQLSRELSTLRNLFKQLPEPLLASAGHC               |
| CEBPD                    | PGTVREKGAGKRGPDGRGSPGYRQRRERNNIAVRKSRDKAKRRNQEMQQ | KLVELSAENEKLIHQVEQLTRDLAQLRQFFKKLPSPPFLPPTGADCR            |
| CEBPG                    | AVPPSKQSKKSSPMDRNSDEYRQRRERNNMAVKKSRLKSKQKAQDTLQ  | RVNQKKEENERLEAKIKLLTKELSVLKDLFLEHAHSLADNVQPISTETTATNSDNPQG |
| N-terminal $\phi$ 10 tag |                                                   |                                                            |
| ATF4                     | VAAKVKGKLDKKLKKMEQNKTAAATRYRQKKRAEQEALTG          | ECKELEKKNEALKEKADSLAKEIQYLKDLIEEVRKARGKKRVP                |
| CEBPB                    | KAKKTVDKLSDEYKMRRENNIAVRKSRDKAKMRNLETQH           | KVLELTAENERLQKKVEQLSRELSTLRNLFKQLPEPLLASAGHC               |
| Consensus                | -BB-BN--AA-B-R-BB-----L--                         | ----L-----L-----L-----L-----L                              |
